# Supplementary material for: Copper(i)-catalyzed asymmetric [3 + 3] annulation involving aziridines to construct tetrahydro-β-carbolines
Source: Royal Society of Chemistry journal article supplement (doi:10.1039/d0qo00742k), 2020-01-01
Supplement: d0qo00742k1.pdf [file d0qo00742k1.pdf]

## Supporting Information

### **Copper(I)-Catalyzed Asymmetric [3 + 3] Annulation Involving Aziridines to Construct Tetrahydro- $\beta$ -carbolines**

Chao Ye,<sup>b†</sup> Wu-Lin Yang,<sup>a,b†</sup> Yufei Zhai,<sup>a</sup> Hua Deng,<sup>b</sup> Xiaoyan Luo,<sup>\*b</sup> Guoyin Kai<sup>\*a</sup> and Wei-Ping Deng<sup>a,b</sup>

<sup>a</sup> College of Pharmacy, Zhejiang Chinese Medical University, Hangzhou 310053, Zhejiang, China. E-mail: kaiguoyin@163.com.

<sup>b</sup> Shanghai Key Laboratory of New Drug Design, School of Pharmacy, East China University of Science and Technology, 130 Meilong Road, Shanghai 200237, China. E-mail: xyluo@ecust.edu.cn.

† These authors contributed equally to this work.

## Contents

1. General information
2. Optimization study
3. Preparation and characterization data of chiral tetrahydro- $\beta$ -carbolines
4. References
5. <sup>1</sup>H NMR and <sup>13</sup>C NMR spectra
6. HPLC chromatograms

---

## 1. General information

<sup>1</sup>H NMR spectrum were recorded on a Bruker DPX 400 MHz spectrometer in CDCl<sub>3</sub>. Chemical shifts were reported in ppm with the internal TMS signal at 0.0 ppm as a standard. The spectra are interpreted as: s = singlet, d = doublet, t = triplet, m = multiplet, dd = doublet of doublets, td = triplet of doublets, dt = doublet of triplets, ddd = doublet of doublet of doublets, coupling constant (s) J are reported in Hz and relative integrations are reported. <sup>13</sup>C NMR (100 MHz) spectrum were recorded on a Bruker DPX 400 MHz spectrometer in CDCl<sub>3</sub>. Chemical shifts were reported in ppm with the internal chloroform signal at 77.06 ppm as a standard. Optical rotations were measured on an AUTOPOL V. Diastereomeric ratios were determined by analysis of <sup>1</sup>H NMR spectroscopy. Enantiomeric excesses were determined by analysis of HPLC traces, obtained by using Chiralpak IA columns with hexane and isopropanol or ethyl acetate as solvents. (Chiralpak IA columns were purchased from Daicel Chemical Industries, LTD.) Melting points were obtained in open capillary tubes using SGW X-4 micro melting point apparatus which were uncorrected. High-resolution mass spectra (HRMS) were recorded on a Waters GCT Premier mass spectrometer using EI-TOF (electron ionization-time of flight). Commercially available materials purchased from Adamas-beta, TCI or Energy Chemical and were used as received. Substituted 2-vinylindoles<sup>1</sup> and aziridines<sup>2</sup> were prepared according to the literature procedures.

## 2. Optimization study

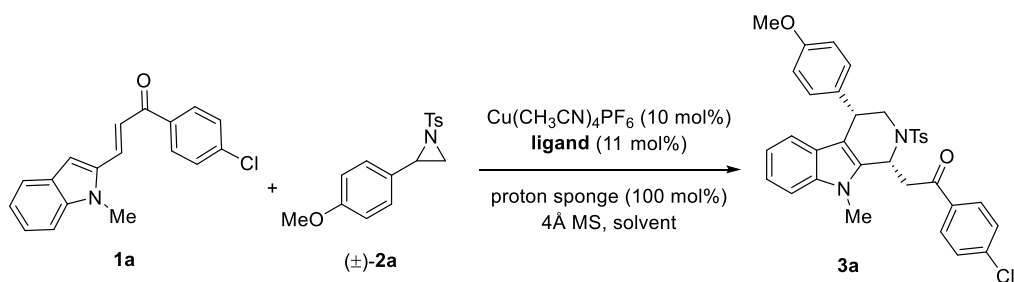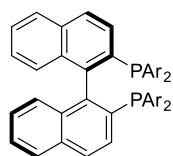

**L1:** Ar = C<sub>6</sub>H<sub>5</sub>  
**L2:** Ar = 3,5-Me<sub>2</sub>C<sub>6</sub>H<sub>3</sub>

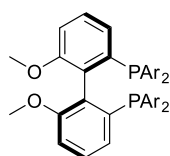

**L3:** Ar = C<sub>6</sub>H<sub>5</sub>  
**L4:** Ar = 3,5-(tBu)<sub>2</sub>-4-OMeC<sub>6</sub>H<sub>2</sub>

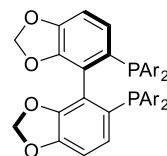

**L5:** Ar = C<sub>6</sub>H<sub>5</sub>  
**L6:** Ar = 3,5-(tBu)<sub>2</sub>-4-OMeC<sub>6</sub>H<sub>2</sub>

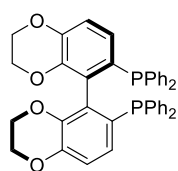

**L7**

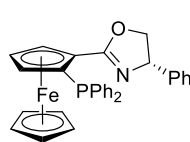

**L8**

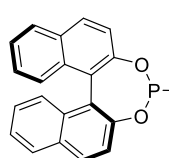

**L9**

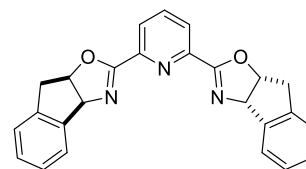

**L10**

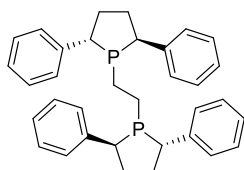

**L11**

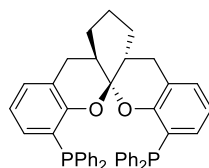

**L12**

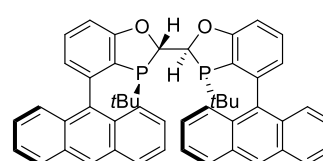

**L13**

| entry | ligand     | solvent | yield (%) <sup>[b]</sup> | dr <sup>[c]</sup> | ee (%) <sup>[d]</sup> |
|-------|------------|---------|--------------------------|-------------------|-----------------------|
| 1     | <b>L1</b>  | toluene | 60                       | 3.4:1             | 68                    |
| 2     | <b>L2</b>  | toluene | 62                       | 11.1:1            | 73                    |
| 3     | <b>L3</b>  | toluene | 38                       | 5.6:1             | 55                    |
| 4     | <b>L4</b>  | toluene | 84                       | >20:1             | 68                    |
| 5     | <b>L5</b>  | toluene | 47                       | 5:1               | 45                    |
| 6     | <b>L6</b>  | toluene | 80                       | >20:1             | 84                    |
| 7     | <b>L7</b>  | toluene | 57                       | 13:1              | 25                    |
| 8     | <b>L8</b>  | toluene | 27                       | >20:1             | -10                   |
| 9     | <b>L9</b>  | toluene | 34                       | 6:1               | -10                   |
| 10    | <b>L10</b> | toluene | 12                       | 20:1              | -10                   |
| 11    | <b>L11</b> | toluene | 38                       | 11.7:1            | 64                    |
| 12    | <b>L12</b> | toluene | 19                       | 10:1              | 11                    |

|                   |            |                                 |      |        |     |
|-------------------|------------|---------------------------------|------|--------|-----|
| 13                | <b>L13</b> | toluene                         | 17   | 9:1    | -33 |
| 14 <sup>[e]</sup> | <b>L6</b>  | toluene                         | 68   | >20:1  | 91  |
| 15 <sup>[f]</sup> | <b>L6</b>  | toluene                         | 93   | >20:1  | 90  |
| 16 <sup>[g]</sup> | <b>L6</b>  | toluene                         | 57   | >20:1  | 94  |
| 17 <sup>[h]</sup> | <b>L6</b>  | toluene                         | 75   | >20:1  | 93  |
| 18 <sup>[i]</sup> | <b>L6</b>  | toluene                         | N.P. | /      | /   |
| 19                | <b>L6</b>  | DCE                             | 67   | 12.5:1 | 92  |
| 20                | <b>L6</b>  | MeCN                            | N.P. | /      | /   |
| 21                | <b>L6</b>  | Mesitylene                      | 72   | >20:1  | 82  |
| 22                | <b>L6</b>  | CHCl <sub>3</sub>               | 66   | >20:1  | 88  |
| 23                | <b>L6</b>  | CH <sub>2</sub> Cl <sub>2</sub> | 63   | 13:1   | 89  |
| 24                | <b>L6</b>  | THF                             | N.P. | /      | /   |
| 25                | <b>L6</b>  | xylene                          | 74   | >20:1  | 82  |
| 26                | <b>L6</b>  | PhCF <sub>3</sub>               | 95   | 12:1   | 92  |
| 27 <sup>[g]</sup> | <b>L6</b>  | PhCF <sub>3</sub>               | 62   | >20:1  | 95  |
| 28 <sup>[h]</sup> | <b>L6</b>  | PhCF <sub>3</sub>               | 95   | >20:1  | 94  |
| 29 <sup>[i]</sup> | <b>L6</b>  | PhCF <sub>3</sub>               | N.P. | /      | /   |

[a] Unless others stated, reactions were performed with **1a** (0.10 mmol), **2a** (0.20 mmol) in 1.0 mL of solvent with activated powdered 4Å molecular sieves (100 mg) added at 65 °C for 24 h. [b] Isolated yield. [c] Determined by <sup>1</sup>H NMR analysis. [d] Determined by chiral HPLC analysis. [e] Reaction was conducted at 25 °C for 24 h. [f] Reaction was conducted at 25 °C for 12 h, then at 65 °C for 12 h. [g] Reaction was conducted at 15 °C for 24 h. [h] Reaction was conducted at 15 °C for 12 h, then at 65 °C for 12 h. [i] Reaction was conducted at 0 °C for 24 h. N.P. = no product.

### 3. Preparation and characterization data of chiral tetrahydro- $\beta$ -carbolines

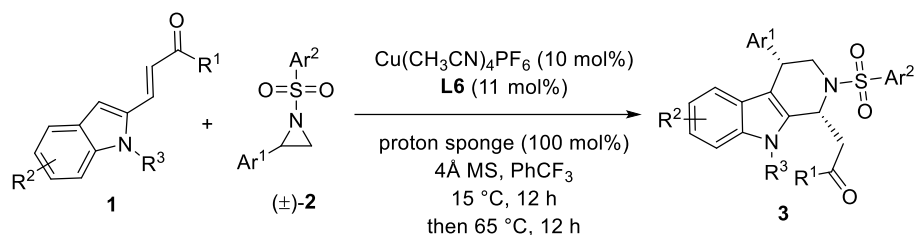

Under a nitrogen atmosphere,  $\text{Cu}(\text{CH}_3\text{CN})_4\text{PF}_6$  (0.01 mmol), ligand **L6** (0.011 mmol) and activated powdered 4Å molecular sieves (100 mg) were dissolved in 1.0 mL of dry  $\text{PhCF}_3$  and stirred at room temperature for about 30 min. Then, substituted 2-vinylindoles **1** (0.1 mmol), aziridines **2** (0.2 mmol), and proton sponge (21.4 mg, 0.1 mmol) were added to the resulting mixture, and the mixture was stirred at 15 °C for 12 h, then stirred at 65 °C for 12 h. The solvent was evaporated and the residue was purified by column chromatography on silica gel to afford products **3**.

#### 1-(4-Chlorophenyl)-2-((1*R*,4*S*)-4-(4-methoxyphenyl)-9-methyl-2-tosyl-2,3,4,9-tetrahydro-1*H*-pyrido[3,4-*b*]indol-1-yl)ethan-1-one (**3a**)

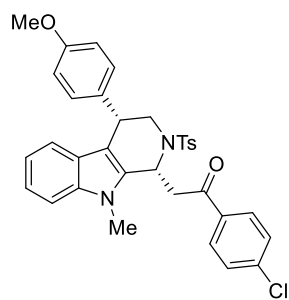

56.9 mg, 95% yield, light yellow solid, m.p. 164–166 °C;  $^1\text{H NMR}$  (400 MHz,  $\text{CDCl}_3$ )  $\delta$  7.79 (d,  $J = 8.6$  Hz, 2H), 7.58 (d,  $J = 8.3$  Hz, 2H), 7.41 (d,  $J = 8.6$  Hz, 2H), 7.25 (m, 1H), 7.17 – 7.11 (m, 3H), 7.02 (d,  $J = 8.1$  Hz, 2H), 6.89 – 6.82 (m, 3H), 6.66 (d,  $J = 7.9$  Hz, 1H), 6.00 (dd,  $J = 7.6, 2.9$  Hz, 1H), 4.24 – 4.14 (m, 2H), 3.81 (s, 3H), 3.72 (s, 3H), 3.71 – 3.66 (m, 1H), 3.21 – 3.07 (m, 2H), 2.23 (s, 3H);  $^{13}\text{C NMR}$  (100 MHz,  $\text{CDCl}_3$ )  $\delta$  195.1, 158.8, 143.4, 140.1, 137.5, 137.3, 135.1, 135.0, 133.2, 129.7 (2C), 129.4 (2C), 129.3 (2C), 129.0 (2C), 127.0 (2C), 125.8, 121.9, 120.2, 119.3, 114.1 (2C), 110.3, 108.9, 55.3, 48.4, 48.3, 43.9, 39.0, 30.0, 21.4; **HRMS** (EI,  $m/z$ ): calcd for  $\text{C}_{34}\text{H}_{31}\text{ClN}_2\text{O}_4\text{S} [\text{M}]^+$ : 598.1688, found: 598.1697;  $[\alpha]_D^{25} = +17.2$  ( $c$  1.00,  $\text{CH}_2\text{Cl}_2$ ); 94% ee, >20:1 dr; **HPLC** (Chiralpak IA, hexane/isopropanol = 70/30, 1.0 mL/min, 254 nm)  $t_R = 11.30$  min (major), 18.52 min (minor).

#### 1-(2-Chlorophenyl)-2-((1*R*,4*S*)-4-(4-methoxyphenyl)-9-methyl-2-tosyl-2,3,4,9-tetrahydro-1*H*-pyrido[3,4-*b*]indol-1-yl)ethan-1-one (**3b**)

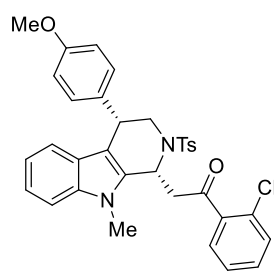

34.2 mg, 57% yield, light yellow solid, m.p. 133–135 °C;  $^1\text{H NMR}$  (400 MHz,  $\text{CDCl}_3$ )  $\delta$  7.71 – 7.64 (m, 2H), 7.47 – 7.43 (m, 1H), 7.42 – 7.37 (m, 2H), 7.34 – 7.30 (m, 1H), 7.27 – 7.24 (m, 1H), 7.15 – 7.06 (m, 5H), 6.86 – 6.79 (m, 3H), 6.62 (d,  $J = 7.9$  Hz, 1H), 5.96 (dd,  $J = 8.3, 3.1$  Hz, 1H), 4.15 (dd,  $J = 14.3, 6.1$  Hz, 1H), 4.05 (dd,  $J = 10.7, 6.1$  Hz, 1H), 3.79 (s, 3H), 3.75 (s, 3H), 3.73 – 3.67 (m, 1H), 3.34 (dd,  $J = 17.0, 3.2$  Hz, 1H), 3.13 (dd,  $J = 14.3, 10.8$  Hz, 1H), 2.26 (s, 3H);  $^{13}\text{C NMR}$  (100 MHz,  $\text{CDCl}_3$ )  $\delta$  199.1, 158.7, 143.5, 138.9, 137.4, 137.2, 134.9, 133.2, 132.3, 130.8, 130.4, 129.8, 129.5 (2C), 129.3 (2C), 127.2(4), 127.1(6) (2C), 125.8, 121.8, 120.1, 119.2,

114.1 (2C), 110.2, 108.9, 55.3, 48.5, 48.2, 48.1, 38.6, 30.0, 21.4; **HRMS** (EI, m/z): calcd for C<sub>34</sub>H<sub>31</sub>ClN<sub>2</sub>O<sub>4</sub>S [M]<sup>+</sup>: 598.1688, found: 598.1696; [α]<sub>D</sub><sup>25</sup> = +19.8 (c 1.00, CH<sub>2</sub>Cl<sub>2</sub>); 91% ee, >20:1 dr; **HPLC** (Chiralpak IA, hexane/ethyl acetate = 70/30, 1.0 mL/min, 254 nm) t<sub>R</sub> = 8.23 min (major), 11.00 min (minor).

**1-(3-Chlorophenyl)-2-((1*R*,4*S*)-4-(4-methoxyphenyl)-9-methyl-2-tosyl-2,3,4,9-tetrahydro-1*H*-pyrido[3,4-*b*]indol-1-yl)ethan-1-one (3c)**

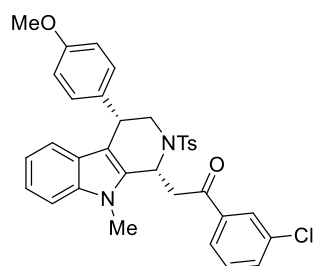

55.7 mg, 93% yield, light yellow oil; **<sup>1</sup>H NMR** (400 MHz, CDCl<sub>3</sub>) δ 7.77 (t, *J* = 1.9 Hz, 1H), 7.71 (dt, *J* = 7.8, 1.3 Hz, 1H), 7.59 (d, *J* = 8.3 Hz, 2H), 7.53 (ddd, *J* = 8.0, 2.2, 1.0 Hz, 1H), 7.37 (t, *J* = 7.9 Hz, 1H), 7.28 – 7.24 (m, 1H), 7.18 – 7.10 (m, 3H), 7.04 (d, *J* = 8.0 Hz, 2H), 6.91 – 6.83 (m, 3H), 6.67 (d, *J* = 7.9 Hz, 1H), 6.01 (dd, *J* = 7.7, 3.1 Hz, 1H), 4.26 – 4.18 (m, 2H), 3.81 (s, 3H), 3.72 (s, 3H), 3.69 – 3.62 (m, 1H), 3.22 – 3.07 (m, 2H), 2.23 (s, 3H); **<sup>13</sup>C NMR** (100 MHz, CDCl<sub>3</sub>) δ 195.0, 158.7, 143.4, 138.1, 137.5, 137.3, 135.1, 135.0, 133.5, 133.1, 130.0, 129.5 (2C), 129.3 (2C), 128.4, 127.0 (2C), 126.4, 125.8, 121.9, 120.2, 119.3, 114.1 (2C), 110.4, 108.9, 55.3, 48.4, 48.1, 44.0, 39.2, 30.0, 21.4; **HRMS** (EI, m/z): calcd for C<sub>34</sub>H<sub>31</sub>ClN<sub>2</sub>O<sub>4</sub>S [M]<sup>+</sup>: 598.1688, found: 598.1688; [α]<sub>D</sub><sup>25</sup> = +21.2 (c 1.00, CH<sub>2</sub>Cl<sub>2</sub>); 94% ee, 10:1 dr; **HPLC** (Chiralpak IA, hexane/ethyl acetate = 70/30, 1.0 mL/min, 254 nm) t<sub>R</sub> = 8.22 min (major), 12.43 min (minor).

**1-(4-Bromophenyl)-2-((1*R*,4*S*)-4-(4-methoxyphenyl)-9-methyl-2-tosyl-2,3,4,9-tetrahydro-1*H*-pyrido[3,4-*b*]indol-1-yl)ethan-1-one (3d)**

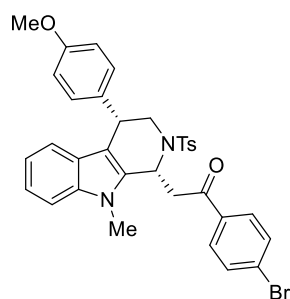

50.2 mg, 78% yield, light yellow solid, m.p. 140–142 °C; **<sup>1</sup>H NMR** (400 MHz, CDCl<sub>3</sub>) δ 7.75 – 7.67 (m, 2H), 7.61 – 7.54 (m, 3H), 7.27 (s, 1H), 7.28 – 7.24 (s, 1H), 7.17 – 7.10 (m, 3H), 7.02 (d, *J* = 8.0 Hz, 2H), 6.90 – 6.78 (m, 3H), 6.66 (d, *J* = 7.9 Hz, 1H), 6.00 (dd, *J* = 7.7, 3.1 Hz, 1H), 4.26 – 4.13 (m, 2H), 3.81 (s, 3H), 3.72 (s, 3H), 3.72 – 3.61 (m, 1H), 3.22 – 3.05 (m, 2H), 2.23 (s, 3H); **<sup>13</sup>C NMR** (100 MHz, CDCl<sub>3</sub>) δ 195.3, 158.7, 143.4, 137.5, 137.3, 135.3, 135.1, 133.1, 132.0 (2C), 129.8 (2C), 129.4 (2C), 129.3 (2C), 128.9, 127.0 (2C), 125.8, 121.8, 120.2, 119.3, 114.1 (2C), 110.3, 108.9, 55.3, 48.4, 48.3, 43.8, 39.0, 30.0, 21.4; **HRMS** (EI, m/z): calcd for C<sub>34</sub>H<sub>31</sub><sup>79</sup>BrN<sub>2</sub>O<sub>4</sub>S [M]<sup>+</sup>: 642.1182, found: 642.1184; calcd for C<sub>34</sub>H<sub>31</sub><sup>81</sup>BrN<sub>2</sub>O<sub>4</sub>S [M]<sup>+</sup>: 644.1162, found: 644.1168; [α]<sub>D</sub><sup>25</sup> = +24.2 (c 1.00, CH<sub>2</sub>Cl<sub>2</sub>); 94% ee, 6:1 dr; **HPLC** (Chiralpak IA, hexane/ethyl acetate = 70/30, 1.0 mL/min, 254 nm) t<sub>R</sub> = 9.45 min (major), 15.25 min (minor).

**4-((1*R*,4*S*)-4-(4-Methoxyphenyl)-9-methyl-2-tosyl-2,3,4,9-tetrahydro-1*H*-pyrido[3,4-*b*]indol-1-yl)acetyl)benzonitrile (3e)**

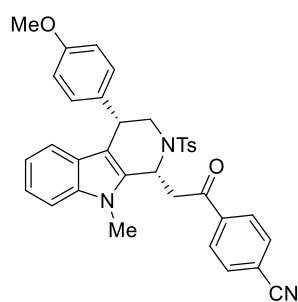

24.8 mg, 42% yield, light yellow oil;  $^1\text{H NMR}$  (400 MHz,  $\text{CDCl}_3$ )  $\delta$  7.96 (d,  $J = 8.3$  Hz, 2H), 7.79 – 7.72 (m, 2H), 7.59 (d,  $J = 8.3$  Hz, 2H), 7.28 – 7.24 (m, 1H), 7.17 – 7.09 (m, 3H), 7.05 (d,  $J = 8.2$  Hz, 2H), 6.85 (dd,  $J = 8.1, 5.8$  Hz, 3H), 6.65 (d,  $J = 7.7$  Hz, 1H), 5.96 (dd,  $J = 8.0, 2.9$  Hz, 1H), 4.20 (dd,  $J = 14.2, 6.0$  Hz, 1H), 4.08 (dd,  $J = 10.8, 6.0$  Hz, 1H), 3.81 (s, 3H), 3.79 – 3.75 (m, 1H), 3.73 (s, 3H), 3.22 – 3.13 (m, 2H), 2.24 (s, 3H);  $^{13}\text{C NMR}$  (100 MHz,  $\text{CDCl}_3$ )  $\delta$  195.3, 158.8, 143.6, 139.6, 137.5, 137.1, 134.6, 132.9, 132.6 (2C), 129.5 (2C), 129.3 (2C), 128.7 (2C), 127.0 (2C), 125.7, 122.0, 120.2, 119.4, 117.8, 116.7, 114.1 (2C), 110.4, 108.9, 55.3, 48.4, 48.3, 44.2, 38.8, 30.0, 21.4; **HRMS** (EI,  $m/z$ ): calcd for  $\text{C}_{35}\text{H}_{31}\text{N}_3\text{O}_4\text{S} [\text{M}]^+$ : 589.2030, found: 589.2036;  $[\alpha]_{\text{D}}^{25} = +53.5$  ( $c$  1.00,  $\text{CH}_2\text{Cl}_2$ ); 95% ee, 12.5:1 dr; **HPLC** (Chiralpak IA, hexane/ isopropanol = 70/30, 1.0 mL/min, 254 nm)  $t_{\text{R}} = 18.09$  min (major), 31.84 min (minor).

**2-((1*R*,4*S*)-4-(4-Methoxyphenyl)-9-methyl-2-tosyl-2,3,4,9-tetrahydro-1*H*-pyrido[3,4-*b*]indol-1-yl)-1-(*p*-tolyl)ethan-1-one (3f)**

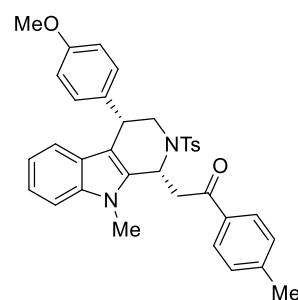

49.2 mg, 85% yield, light yellow solid, m.p. 167–169 °C;  $^1\text{H NMR}$  (400 MHz,  $\text{CDCl}_3$ )  $\delta$  7.75 (d,  $J = 8.2$  Hz, 2H), 7.59 (d,  $J = 8.3$  Hz, 2H), 7.27 – 7.21 (m, 3H), 7.18 – 7.10 (m, 3H), 7.00 (d,  $J = 8.0$  Hz, 2H), 6.88 – 6.81 (m, 3H), 6.66 (d,  $J = 7.9$  Hz, 1H), 6.04 (dd,  $J = 7.6, 3.3$  Hz, 1H), 4.25 – 4.17 (m, 2H), 3.81 (s, 3H), 3.71 (s, 3H), 3.70 – 3.65 (m, 1H), 3.22 – 3.09 (m, 2H), 2.41 (s, 3H), 2.20 (s, 3H);  $^{13}\text{C NMR}$  (100 MHz,  $\text{CDCl}_3$ )  $\delta$  195.6, 158.7, 144.5, 143.2, 137.4, 137.3, 135.5, 134.1, 133.3, 129.4 (2C), 129.4 (2C), 129.3 (2C), 128.5 (2C), 127.1 (2C), 125.8, 121.7, 120.1, 119.2, 114.1 (2C), 110.1, 108.9, 55.3, 48.4, 48.1, 43.8, 39.1, 30.0, 21.7, 21.4; **HRMS** (EI,  $m/z$ ): calcd for  $\text{C}_{35}\text{H}_{34}\text{N}_2\text{O}_4\text{S} [\text{M}]^+$ : 578.2234, found: 578.2238;  $[\alpha]_{\text{D}}^{25} = +31.9$  ( $c$  1.00,  $\text{CH}_2\text{Cl}_2$ ); 93% ee, 14:1 dr; **HPLC** (Chiralpak IA, hexane/ethyl acetate = 70/30, 1.0 mL/min, 254 nm)  $t_{\text{R}} = 9.93$  min (major), 13.94 min (minor).

**The X-ray data for compound 3f**

Compound **3f** with 96% ee was obtained by recrystallization from ethyl acetate and petroleum ether, which was suspended in hexane in a screw-top vial. Drops of DCE were added with shaking until all the compound has dissolved. The lid was then loosely screwed on the vial, and a single crystal was obtained by natural volatilization at room temperature. The data set was collected by a Bruker APEX-II CCD at 293(2) K equipped with micro-focus Mo radiation source ( $K\alpha = 0.71073$  Å). Applied with face-indexed numerical absorption correction, the structure solution was solved and refinement was processed by SHELXTL program package. Details of the X-ray experiments and crystal data are summarized below. CCDC 2007786 contains the supplementary crystallographic data, and can be obtained free of charge via [www.ccdc.cam.ac.uk/conts/retrieving.html](http://www.ccdc.cam.ac.uk/conts/retrieving.html).

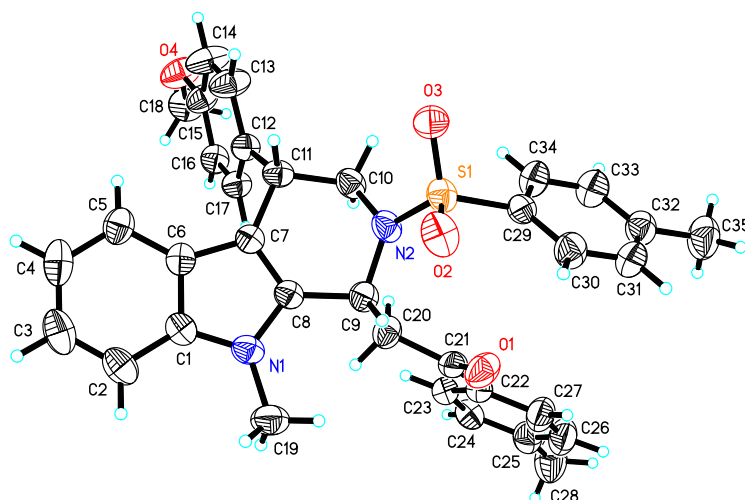

ellipsoid contour at 30% probability level

|                                 |                                                                 |                    |
|---------------------------------|-----------------------------------------------------------------|--------------------|
| Identification code             | mo_d8v20175_0m                                                  |                    |
| Empirical formula               | C <sub>35</sub> H <sub>34</sub> N <sub>2</sub> O <sub>4</sub> S |                    |
| Formula weight                  | 578.70                                                          |                    |
| Temperature                     | 293(2) K                                                        |                    |
| Wavelength                      | 0.71073 Å                                                       |                    |
| Crystal system                  | Monoclinic                                                      |                    |
| Space group                     | P 21                                                            |                    |
| Unit cell dimensions            | a = 8.9637(3) Å                                                 | α = 90°.           |
|                                 | b = 14.9790(6) Å                                                | β = 100.0870(10)°. |
|                                 | c = 11.5706(5) Å                                                | γ = 90°.           |
| Volume                          | 1529.54(10) Å <sup>3</sup>                                      |                    |
| Z                               | 2                                                               |                    |
| Density (calculated)            | 1.257 Mg/m <sup>3</sup>                                         |                    |
| Absorption coefficient          | 0.147 mm <sup>-1</sup>                                          |                    |
| F(000)                          | 612                                                             |                    |
| Crystal size                    | 0.200 x 0.160 x 0.130 mm <sup>3</sup>                           |                    |
| Theta range for data collection | 2.246 to 25.999°.                                               |                    |
| Index ranges                    | -11 ≤ h ≤ 11, -18 ≤ k ≤ 18, -13 ≤ l ≤ 14                        |                    |
| Reflections collected           | 15690                                                           |                    |
| Independent reflections         | 5948 [R(int) = 0.0276]                                          |                    |
| Completeness to theta = 25.242° | 98.8 %                                                          |                    |
| Absorption correction           | Semi-empirical from equivalents                                 |                    |
| Max. and min. transmission      | 0.7456 and 0.6430                                               |                    |
| Refinement method               | Full-matrix least-squares on F <sup>2</sup>                     |                    |
| Data / restraints / parameters  | 5948 / 1 / 384                                                  |                    |



|                                      |                                    |
|--------------------------------------|------------------------------------|
| Goodness-of-fit on $F^2$             | 1.028                              |
| Final R indices [ $I > 2\sigma(I)$ ] | $R1 = 0.0400$ , $wR2 = 0.0980$     |
| R indices (all data)                 | $R1 = 0.0517$ , $wR2 = 0.1087$     |
| Absolute structure parameter         | -0.03(2)                           |
| Extinction coefficient               | 0.054(12)                          |
| Largest diff. peak and hole          | 0.139 and -0.158 e.Å <sup>-3</sup> |

**2-((1*R*,4*S*)-4-(4-Methoxyphenyl)-9-methyl-2-tosyl-2,3,4,9-tetrahydro-1*H*-pyrido[3,4-*b*]indol-1-yl)-1-(*o*-tolyl)ethan-1-one (3g)**

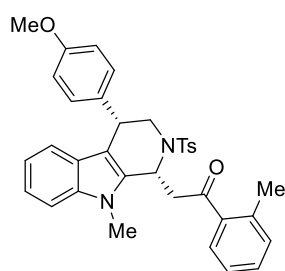

49.8 mg, 86% yield, light yellow oil;  $^1\text{H NMR}$  (400 MHz,  $\text{CDCl}_3$ )  $\delta$  7.63 (d,  $J = 8.3$  Hz, 2H), 7.51 (d,  $J = 7.7$  Hz, 1H), 7.38 (td,  $J = 7.5$ , 1.4 Hz, 1H), 7.28 – 7.24 (s, 1H), 7.25 – 7.18 (m, 2H), 7.16 – 7.08 (m, 3H), 7.04 (d,  $J = 8.1$  Hz, 2H), 6.89 – 6.81 (m, 3H), 6.64 (d,  $J = 8.0$  Hz, 1H), 6.02 (dd,  $J = 8.0$ , 3.0 Hz, 1H), 4.21 (dd,  $J = 14.1$ , 6.1 Hz, 1H), 4.13 (dd,  $J = 10.7$ , 6.1 Hz, 1H), 3.80 (s, 3H), 3.75 (s, 3H), 3.66 (dd,  $J = 16.7$ , 7.9 Hz, 1H), 3.22 – 3.09 (m, 2H), 2.53 (s, 3H), 2.22 (s, 3H);  $^{13}\text{C NMR}$  (100 MHz,  $\text{CDCl}_3$ )  $\delta$  199.3, 158.7, 143.4, 139.2, 137.4, 137.3, 137.0, 135.4, 133.3, 132.2, 131.9, 129.4 (2C), 129.3 (2C), 128.8, 127.1 (2C), 125.8(2), 125.7(6), 121.7, 120.1, 119.2, 114.1 (2C), 110.1, 108.9, 55.3, 48.3(2), 48.3(0), 46.7, 38.8, 30.0, 21.5, 21.4; **HRMS** (EI,  $m/z$ ): calcd for  $\text{C}_{35}\text{H}_{34}\text{N}_2\text{O}_4\text{S}$  [ $\text{M}$ ]<sup>+</sup>: 578.2234, found: 578.2233;  $[\alpha]_{\text{D}}^{25} = +19.0$  ( $c$  1.00,  $\text{CH}_2\text{Cl}_2$ ); 92% ee, 20:1 dr; **HPLC** (Chiralpak IA, hexane/ethyl acetate = 70/30, 1.0 mL/min, 254 nm)  $t_{\text{R}} = 7.47$  min (major), 10.87 min (minor).

**2-((1*R*,4*S*)-4-(4-Methoxyphenyl)-9-methyl-2-tosyl-2,3,4,9-tetrahydro-1*H*-pyrido[3,4-*b*]indol-1-yl)-1-(*m*-tolyl)ethan-1-one (3h)**

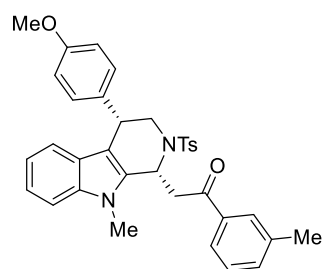

56.7 mg, 98% yield, light yellow oil;  $^1\text{H NMR}$  (400 MHz,  $\text{CDCl}_3$ )  $\delta$  7.66 – 7.58 (m, 4H), 7.38 (d,  $J = 7.6$  Hz, 1H), 7.32 (d,  $J = 8.0$  Hz, 1H), 7.27 – 7.23 (s, 1H), 7.18 – 7.10 (m, 3H), 7.02 (d,  $J = 8.0$  Hz, 2H), 6.88 – 6.82 (m, 3H), 6.66 (d,  $J = 7.8$  Hz, 1H), 6.05 (dd,  $J = 7.5$ , 3.3 Hz, 1H), 4.25 – 4.18 (m, 2H), 3.81 (s, 3H), 3.71 (s, 3H), 3.69 – 3.62 (m, 1H), 3.23 – 3.10 (m, 2H), 2.38 (s, 3H), 2.21 (s, 3H);  $^{13}\text{C NMR}$  (100 MHz,  $\text{CDCl}_3$ )  $\delta$  196.2, 158.7, 143.2, 138.5, 137.4, 137.3, 136.6, 135.5, 134.3, 133.3, 129.3(9) (2C), 129.3(5) (2C), 128.8, 128.6, 127.1 (2C), 125.8, 125.5, 121.7, 120.2, 119.2, 114.1 (2C), 110.1, 108.9, 55.3, 48.4, 48.0, 44.0, 39.1, 30.0, 21.3(9), 21.3(7); **HRMS** (EI,  $m/z$ ): calcd for  $\text{C}_{35}\text{H}_{34}\text{N}_2\text{O}_4\text{S}$  [ $\text{M}$ ]<sup>+</sup>: 578.2234, found: 578.2242;  $[\alpha]_{\text{D}}^{25} = +21.9$  ( $c$  1.00,  $\text{CH}_2\text{Cl}_2$ ); 91% ee, 14:1 dr; **HPLC** (Chiralpak IA, hexane/ethyl acetate = 70/30, 1.0 mL/min, 254 nm)  $t_{\text{R}} = 8.47$  min (major), 11.54 min (minor).

**1-(4-Methoxyphenyl)-2-((1*R*,4*S*)-4-(4-methoxyphenyl)-9-methyl-2-tosyl-2,3,4,9-tetrahydro-1*H*-pyrido[3,4-*b*]indol-1-yl)ethan-1-one (3i)**

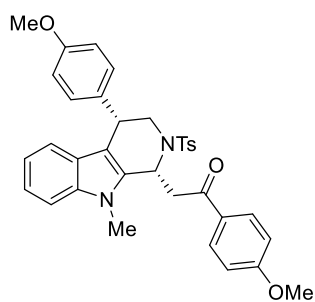

53.5 mg, 90% yield, light yellow solid, m.p. 172–174 °C; <sup>1</sup>H NMR (400 MHz, CDCl<sub>3</sub>) δ 7.83 (d, *J* = 8.9 Hz, 2H), 7.59 (d, *J* = 8.3 Hz, 2H), 7.28 – 7.22 (m, 1H), 7.17 – 7.10 (m, 3H), 7.00 (d, *J* = 8.1 Hz, 2H), 6.92 – 6.82 (m, 5H), 6.66 (d, *J* = 7.9 Hz, 1H), 6.06 – 6.01 (m, 1H), 4.25 – 4.16 (m, 2H), 3.86 (s, 3H), 3.81 (s, 3H), 3.72 (s, 3H), 3.70 – 3.63 (m, 1H), 3.24 – 3.04 (m, 2H), 2.21 (s, 3H); <sup>13</sup>C NMR (100 MHz, CDCl<sub>3</sub>) δ 194.5, 163.9, 158.7, 143.2, 137.4, 137.3, 135.5, 133.3, 130.7 (2C), 129.7, 129.3(5) (2C), 129.3(3) (2C), 127.0 (2C), 125.8, 121.7, 120.1, 119.2, 114.1 (2C), 113.8 (2C), 110.1, 108.9, 55.5, 55.3, 48.4, 48.3, 43.5, 39.1, 30.0, 21.4; HRMS (EI, m/z): calcd for C<sub>35</sub>H<sub>34</sub>N<sub>2</sub>O<sub>5</sub>S [M]<sup>+</sup>: 594.2183, found: 594.2190; [α]<sub>D</sub><sup>25</sup> = +51.1 (*c* 1.00, CH<sub>2</sub>Cl<sub>2</sub>); 94% ee, 11:1 dr; HPLC (Chiralpak IA, hexane/ethyl acetate = 70/30, 1.0 mL/min, 254 nm) t<sub>R</sub> = 12.75 min (major), 17.90 min (minor).

**2-((1*R*,4*S*)-4-(4-Methoxyphenyl)-9-methyl-2-tosyl-2,3,4,9-tetrahydro-1*H*-pyrido[3,4-*b*]indol-1-yl)-1-phenylethan-1-one (3j)**

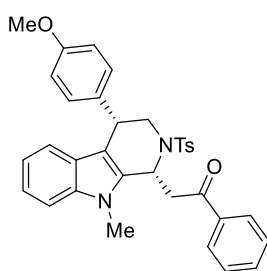

50.3 mg, 89% yield, light yellow solid, m.p. 124–126 °C; <sup>1</sup>H NMR (400 MHz, CDCl<sub>3</sub>) δ 7.85 (d, *J* = 7.2 Hz, 2H), 7.63 – 7.53 (m, 3H), 7.44 (t, *J* = 7.8 Hz, 2H), 7.28 – 7.23 (m, 1H), 7.18 – 7.10 (m, 3H), 7.00 (d, *J* = 8.0 Hz, 2H), 6.85 (d, *J* = 8.6 Hz, 3H), 6.66 (d, *J* = 7.9 Hz, 1H), 6.05 (dd, *J* = 7.6, 3.2 Hz, 1H), 4.25 – 4.17 (m, 2H), 3.81 (s, 3H), 3.76 – 3.68 (m, 4H), 3.22 – 3.08 (m, 2H), 2.20 (s, 3H); <sup>13</sup>C NMR (100 MHz, CDCl<sub>3</sub>) δ 196.0, 158.7, 143.3, 137.5, 137.3, 136.6, 135.4, 133.6, 133.3, 129.4 (2C), 129.3 (2C), 128.7 (2C), 128.3 (2C), 127.1 (2C), 125.8, 121.8, 120.2, 119.2, 114.1 (2C), 110.2, 108.9, 55.3, 48.4, 48.1, 43.9, 39.1, 30.0, 21.4; HRMS (EI, m/z): calcd for C<sub>34</sub>H<sub>32</sub>N<sub>2</sub>O<sub>4</sub>S [M]<sup>+</sup>: 564.2077, found: 564.2078; [α]<sub>D</sub><sup>25</sup> = +17.1 (*c* 1.00, CH<sub>2</sub>Cl<sub>2</sub>); 93% ee, 12.5:1 dr; HPLC (Chiralpak IA, hexane/ethyl acetate = 70/30, 1.0 mL/min, 254 nm) t<sub>R</sub> = 9.26 min (major), 13.62 min (minor).

**1-(Furan-2-yl)-2-((1*R*,4*S*)-4-(4-methoxyphenyl)-9-methyl-2-tosyl-2,3,4,9-tetrahydro-1*H*-pyrido[3,4-*b*]indol-1-yl)ethan-1-one (3k)**

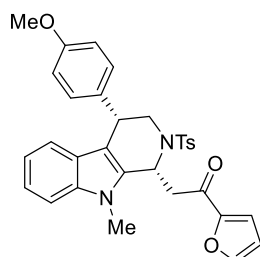

48.3 mg, 87% yield, light yellow solid, m.p. 125–127 °C; <sup>1</sup>H NMR (400 MHz, CDCl<sub>3</sub>) δ 7.61 – 7.55 (m, 3H), 7.28 – 7.25 (m, 1H), 7.19 – 7.10 (m, 4H), 7.06 (d, *J* = 8.1 Hz, 2H), 6.87 – 6.82 (m, 3H), 6.65 (d, *J* = 7.9 Hz, 1H), 6.53 (dd, *J* = 3.6, 1.7 Hz, 1H), 5.94 (dd, *J* = 8.9, 3.3 Hz, 1H), 4.20 – 4.12 (m, 2H), 3.81 (s, 3H), 3.77 (s, 3H), 3.55 (dd, *J* = 15.4, 8.8 Hz, 1H), 3.24 (dd, *J* = 16.1, 12.7 Hz, 1H), 3.09 (dd, *J* = 15.4, 3.3 Hz, 1H), 2.26 (s, 3H); <sup>13</sup>C NMR (100 MHz, CDCl<sub>3</sub>) δ 185.1, 158.7, 152.7, 146.7, 143.3, 137.4, 137.2, 135.0, 133.3, 129.4 (2C), 129.3 (2C), 127.1 (2C), 125.8, 121.8, 120.2, 119.2, 117.8, 114.1 (2C), 112.7, 110.3, 108.9, 55.3, 48.3, 48.0, 44.0, 38.9, 30.0, 21.4; HRMS (EI, m/z): calcd for C<sub>32</sub>H<sub>30</sub>N<sub>2</sub>O<sub>5</sub>S [M]<sup>+</sup>: 554.1870, found: 554.1878; [α]<sub>D</sub><sup>25</sup> = +28.6 (*c* 1.00, CH<sub>2</sub>Cl<sub>2</sub>); 91% ee, 14:1 dr; HPLC (Chiralpak IA, hexane/ isopropanol = 70/30, 1.0

mL/min, 254 nm)  $t_R$  = 12.82 min (major), 18.14 min (minor).

**1-Cyclohexyl-2-((1*R*,4*S*)-4-(4-methoxyphenyl)-9-methyl-2-tosyl-2,3,4,9-tetrahydro-1*H*-pyrido[3,4-*b*]indol-1-yl)ethan-1-one (3l)**

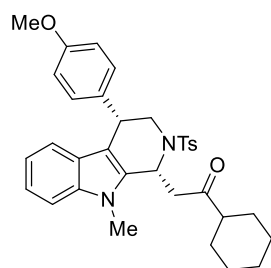

52.5 mg, 92% yield, light yellow solid, m.p. 147–149 °C;  $^1\text{H NMR}$  (400 MHz,  $\text{CDCl}_3$ )  $\delta$  7.66 (d,  $J$  = 8.3 Hz, 2H), 7.25 – 7.22 (m, 1H), 7.17 – 7.07 (m, 5H), 6.85 – 6.80 (m, 3H), 6.62 (d,  $J$  = 7.9 Hz, 1H), 5.82 (dd,  $J$  = 7.9, 3.0 Hz, 1H), 4.23 – 4.17 (m, 1H), 4.09 (dd,  $J$  = 10.8, 6.1 Hz, 1H), 3.80 (s, 3H), 3.66 (s, 3H), 3.14 (m, 2H), 2.70 (dd,  $J$  = 16.8, 3.1 Hz, 1H), 2.34 – 2.24 (m, 4H), 1.84 – 1.71 (m, 4H), 1.67 – 1.61 (m, 1H), 1.32 – 1.15 (m, 5H);  $^{13}\text{C NMR}$  (100 MHz,  $\text{CDCl}_3$ )  $\delta$  209.4, 158.7, 143.4, 137.4, 137.4, 135.4, 133.3, 129.4 (2C), 129.3 (2C), 127.1 (2C), 125.8, 121.7, 120.1, 119.2, 114.0 (2C), 109.9, 108.8, 55.3, 51.3, 48.2, 47.7, 46.1, 38.8, 29.8, 28.1, 27.8, 25.8, 25.6, 25.5, 21.4; **HRMS** (EI,  $m/z$ ): calcd for  $\text{C}_{34}\text{H}_{38}\text{N}_2\text{O}_4\text{S}$   $[\text{M}]^+$ : 570.2547, found: 570.2551;  $[\alpha]_{\text{D}}^{25}$  = +21.1 ( $c$  1.00,  $\text{CH}_2\text{Cl}_2$ ); 92% ee, 17:1 dr; **HPLC** (Chiralpak IA, hexane/ethyl acetate = 70/30, 1.0 mL/min, 254 nm)  $t_R$  = 6.97 min (major), 10.83 min (minor).

**2-((1*R*,4*S*)-9-Benzyl-4-(4-methoxyphenyl)-2-tosyl-2,3,4,9-tetrahydro-1*H*-pyrido[3,4-*b*]indol-1-yl)-1-phenylethan-1-one (3m)**

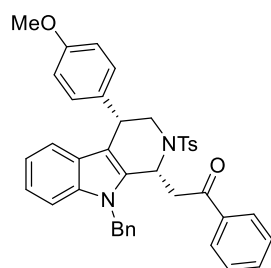

38.4 mg, 60% yield, light yellow oil;  $^1\text{H NMR}$  (400 MHz,  $\text{CDCl}_3$ )  $\delta$  7.68 (d,  $J$  = 7.3 Hz, 2H), 7.52 (t,  $J$  = 7.4 Hz, 1H), 7.45 (d,  $J$  = 8.3 Hz, 2H), 7.39 – 7.33 (m, 2H), 7.23 – 7.14 (m, 6H), 7.13 – 7.05 (m, 1H), 6.99 (dd,  $J$  = 10.7, 7.7 Hz, 4H), 6.88 (dd,  $J$  = 8.4, 3.1 Hz, 3H), 6.70 (d,  $J$  = 7.9 Hz, 1H), 5.97 (dd,  $J$  = 7.8, 2.9 Hz, 1H), 5.40 (d,  $J$  = 3.8 Hz, 2H), 4.27 – 4.16 (m, 2H), 3.82 (s, 3H), 3.58 (dd,  $J$  = 16.7, 7.7 Hz, 1H), 3.21 (dd,  $J$  = 14.0, 10.6 Hz, 1H), 2.96 (dd,  $J$  = 16.7, 3.0 Hz, 1H), 2.23 (s, 3H);  $^{13}\text{C NMR}$  (100 MHz,  $\text{CDCl}_3$ )  $\delta$  196.1, 158.7, 143.2, 137.4, 137.3, 137.2, 136.5, 135.4, 133.3, 133.2, 129.3(9) (2C), 129.3(6) (2C), 128.9 (2C), 128.5 (2C), 128.2 (2C), 127.5 (2C), 127.1 (2C), 126.2, 126.0, 122.1, 120.4, 119.4, 114.1 (2C), 111.1, 109.7, 55.3, 48.3, 48.1, 46.7, 44.1, 39.1, 21.4; **HRMS** (EI,  $m/z$ ): calcd for  $\text{C}_{40}\text{H}_{36}\text{N}_2\text{O}_4\text{S}$   $[\text{M}]^+$ : 640.2390, found: 640.2393;  $[\alpha]_{\text{D}}^{25}$  = +36.3 ( $c$  1.00,  $\text{CH}_2\text{Cl}_2$ ); 89% ee, 6:1 dr; **HPLC** (Chiralpak IA, hexane/ethyl acetate = 70/30, 1.0 mL/min, 254 nm)  $t_R$  = 8.84 min (major), 12.53 min (minor).

**2-((1*R*,4*S*)-4-(4-Methoxyphenyl)-5,9-dimethyl-2-tosyl-2,3,4,9-tetrahydro-1*H*-pyrido[3,4-*b*]indol-1-yl)-1-phenylethan-1-one (3n)**

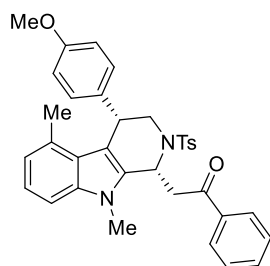

50.9 mg, 88% yield, light yellow oil;  $^1\text{H NMR}$  (400 MHz,  $\text{CDCl}_3$ )  $\delta$  7.87 (d,  $J$  = 7.8 Hz, 2H), 7.55 (t,  $J$  = 7.7 Hz, 3H), 7.44 (t,  $J$  = 7.7 Hz, 2H), 7.10 – 7.01 (m, 4H), 6.93 (d,  $J$  = 8.1 Hz, 2H), 6.82 (d,  $J$  = 8.6 Hz, 2H), 6.65 (d,  $J$  = 6.9 Hz, 1H), 5.95 (dd,  $J$  = 7.6, 3.6 Hz, 1H), 4.37 (dd,  $J$  = 9.5, 6.8 Hz, 1H), 4.14 (dd,  $J$  = 14.5, 6.8 Hz, 1H), 3.79 (s, 4H), 3.70 (s, 3H), 3.27 – 3.14 (m, 2H), 2.12 (s, 3H), 1.82 (s, 3H);  $^{13}\text{C NMR}$  (100 MHz,  $\text{CDCl}_3$ )  $\delta$  196.1, 158.5, 143.4, 137.7, 136.9, 136.6, 136.4, 135.4, 133.6, 130.9, 129.1 (2C), 128.7 (2C), 128.6 (2C), 128.3 (2C), 127.1 (2C), 125.2, 122.0, 121.2, 114.2 (2C), 109.9, 106.6, 55.3, 49.0, 48.5, 43.9, 39.1, 30.0, 21.3, 20.4; **HRMS** (EI,  $m/z$ ):

calcd for  $C_{35}H_{34}N_2O_4S$   $[M]^+$ : 578.2234, found: 578.2237;  $[\alpha]_D^{25} = +18.0$  ( $c$  1.00,  $CH_2Cl_2$ ); 93% ee, >20:1 dr; **HPLC** (Chiralpak IA, hexane/ethyl acetate = 70/30, 1.0 mL/min, 254 nm)  $t_R = 8.91$  min (major), 13.28 min (minor).

**2-((1*R*,4*S*)-6-Methoxy-4-(4-methoxyphenyl)-9-methyl-2-tosyl-2,3,4,9-tetrahydro-1*H*-pyrido[3,4-*b*]indol-1-yl)-1-phenylethan-1-one (3o)**

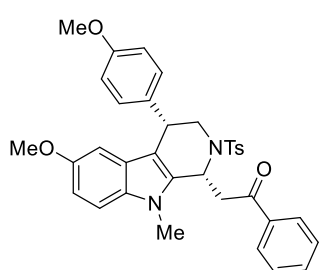

56.5 mg, 95% yield, light yellow oil, m.p. 146–148 °C;  $^1H$  NMR (400 MHz,  $CDCl_3$ )  $\delta$  7.87 – 7.81 (m, 2H), 7.63 – 7.53 (m, 3H), 7.43 (t,  $J = 7.7$  Hz, 2H), 7.17 – 7.11 (m, 3H), 7.00 (d,  $J = 8.0$  Hz, 2H), 6.88 – 6.83 (m, 2H), 6.78 (dd,  $J = 8.8, 2.5$  Hz, 1H), 6.11 (d,  $J = 2.4$  Hz, 1H), 6.03 (dd,  $J = 7.6, 3.3$  Hz, 1H), 4.25 – 4.16 (m, 2H), 3.80 (s, 3H), 3.73 – 3.66 (m, 4H), 3.54 (s, 3H), 3.22 – 3.08 (m, 2H), 2.21 (s, 3H);  $^{13}C$  NMR (100 MHz,  $CDCl_3$ )  $\delta$  196.0, 158.7, 153.6, 143.2, 137.3, 136.5, 136.0, 133.5, 133.1, 132.8, 129.4 (2C), 129.3 (2C), 128.7 (2C), 128.3 (2C), 127.0 (2C), 126.2, 114.1 (2C), 111.2, 109.7, 109.5, 102.7, 55.7, 55.3, 48.4, 48.1, 43.9, 39.1, 30.1, 21.4.; **HRMS** (EI,  $m/z$ ): calcd for  $C_{35}H_{34}N_2O_5S$   $[M]^+$ : 594.2183, found: 594.2186;  $[\alpha]_D^{25} = -10.4$  ( $c$  1.00,  $CH_2Cl_2$ ); 94% ee, 10:1 dr; **HPLC** (Chiralpak IA, hexane/ethyl acetate = 70/30, 1.0 mL/min, 254 nm)  $t_R = 11.09$  min (major), 15.22 min (minor).

**2-((1*R*,4*S*)-6-Bromo-4-(4-methoxyphenyl)-9-methyl-2-tosyl-2,3,4,9-tetrahydro-1*H*-pyrido[3,4-*b*]indol-1-yl)-1-phenylethan-1-one (3p)**

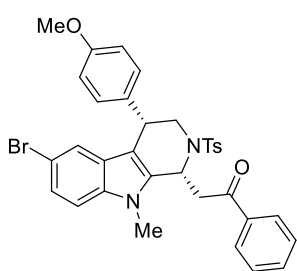

56.0 mg, 87% yield, light yellow solid, m.p. 167–169 °C;  $^1H$  NMR (400 MHz,  $CDCl_3$ )  $\delta$  7.87 – 7.79 (m, 2H), 7.61 – 7.53 (m, 3H), 7.43 (t,  $J = 7.7$  Hz, 2H), 7.20 (dd,  $J = 8.6, 1.9$  Hz, 1H), 7.11 (d,  $J = 8.8$  Hz, 3H), 6.99 (d,  $J = 8.1$  Hz, 2H), 6.86 (d,  $J = 8.6$  Hz, 2H), 6.78 (d,  $J = 1.9$  Hz, 1H), 6.04 (dd,  $J = 7.5, 3.3$  Hz, 1H), 4.22 – 4.11 (m, 2H), 3.82 (s, 3H), 3.74 – 3.66 (m, 4H), 3.20 – 3.05 (m, 2H), 2.20 (s, 3H);  $^{13}C$  NMR (100 MHz,  $CDCl_3$ )  $\delta$  195.8, 158.8, 143.4, 137.1, 136.7, 136.4, 136.1, 133.7, 132.7, 129.4 (2C), 129.1 (2C), 128.7 (2C), 128.3 (2C), 127.5, 127.0 (2C), 124.6, 122.4, 114.3 (2C), 112.6, 110.4, 109.8, 55.3, 48.4, 47.9, 43.7, 38.8, 30.1, 21.4; **HRMS** (EI,  $m/z$ ): calcd for  $C_{34}H_{31}^{79}BrN_2O_4S$   $[M]^+$ : 642.1182, found: 642.1190; calcd for  $C_{34}H_{31}^{81}BrN_2O_4S$   $[M]^+$ : 644.1162, found: 644.1161;  $[\alpha]_D^{25} = -33.7$  ( $c$  1.00,  $CH_2Cl_2$ ); 93% ee, 11:1 dr; **HPLC** (Chiralpak IA, hexane/ethyl acetate = 70/30, 1.0 mL/min, 254 nm)  $t_R = 9.56$  min (major), 15.28 min (minor).

**2-((1*R*,4*S*)-7-Chloro-4-(4-methoxyphenyl)-9-methyl-2-tosyl-2,3,4,9-tetrahydro-1*H*-pyrido[3,4-*b*]indol-1-yl)-1-phenylethan-1-one (3q)**

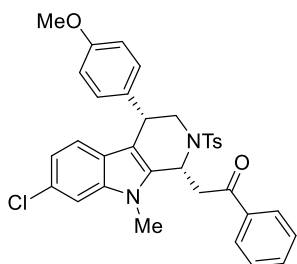

46.1 mg, 77% yield, light yellow oil;  $^1H$  NMR (400 MHz,  $CDCl_3$ )  $\delta$  7.86 – 7.81 (m, 2H), 7.60 – 7.55 (m, 3H), 7.43 (t,  $J = 7.7$  Hz, 2H), 7.24 (d,  $J = 1.8$  Hz, 1H), 7.12 (d,  $J = 8.6$  Hz, 2H), 7.01 (d,  $J = 8.1$  Hz, 2H), 6.85 (d,  $J = 8.6$  Hz, 2H), 6.80 (dd,  $J = 8.4, 1.8$  Hz, 1H), 6.55 (d,  $J = 8.5$  Hz, 1H), 6.04 (dd,  $J = 7.6, 3.2$  Hz, 1H), 4.25 – 4.16 (m, 2H), 3.81 (s, 3H), 3.73 – 3.66 (m, 4H), 3.19 – 3.07 (m, 2H), 2.21 (s, 3H);  $^{13}C$  NMR (100 MHz,  $CDCl_3$ )  $\delta$  195.8, 158.8, 143.4,

137.9, 137.2, 136.4, 136.2, 133.6, 132.9, 129.4 (2C), 129.3 (2C), 128.7 (2C), 128.3 (2C), 127.8, 127.1 (2C), 124.4, 120.9, 119.9, 114.2 (2C), 110.5, 109.1, 55.3, 48.3, 47.9, 43.7, 39.0, 30.1, 21.4; **HRMS** (EI, m/z): calcd for C<sub>34</sub>H<sub>31</sub>ClN<sub>2</sub>O<sub>4</sub>S [M]<sup>+</sup>: 598.1688, found: 598.1691; [α]<sub>D</sub><sup>25</sup> = +18.8 (c 1.00, CH<sub>2</sub>Cl<sub>2</sub>); 91% ee, 10:1 dr; **HPLC** (Chiralpak IA, hexane/ethyl acetate = 70/30, 1.0 mL/min, 254 nm) t<sub>R</sub> = 8.86 min (major), 15.49 min (minor).

**2-((1*R*,4*S*)-4-(4-Methoxyphenyl)-8,9-dimethyl-2-tosyl-2,3,4,9-tetrahydro-1*H*-pyrido[3,4-*b*]indol-1-yl)-1-phenylethan-1-one (3r)**

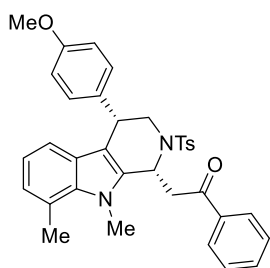

52.7 mg, 91% yield, light yellow solid, m.p. 130–132 °C; **<sup>1</sup>H NMR** (400 MHz, CDCl<sub>3</sub>) δ 7.84 (d, *J* = 7.3 Hz, 2H), 7.63 – 7.54 (m, 3H), 7.43 (t, *J* = 7.7 Hz, 2H), 7.13 (d, *J* = 8.6 Hz, 2H), 7.01 (d, *J* = 8.0 Hz, 2H), 6.88 – 6.79 (m, 3H), 6.69 (t, *J* = 7.5 Hz, 1H), 6.48 (d, *J* = 7.9 Hz, 1H), 6.02 (dd, *J* = 7.9, 3.0 Hz, 1H), 4.24 – 4.15 (m, 2H), 3.96 (s, 3H), 3.80 (s, 3H), 3.72 (dd, *J* = 16.7, 7.8 Hz, 1H), 3.21 – 3.06 (m, 2H), 2.73 (s, 3H), 2.21 (s, 3H); **<sup>13</sup>C NMR** (100 MHz, CDCl<sub>3</sub>) δ 196.1, 158.6, 143.3, 137.3, 136.6, 136.5, 136.0, 133.5, 133.4, 129.4 (2C), 129.3 (2C), 128.7 (2C), 128.3 (2C), 127.1 (2C), 126.7, 124.9, 120.9, 119.3, 118.3, 114.1 (2C), 110.3, 55.3, 48.3, 48.1, 43.8, 39.1, 33.1, 21.4, 20.3; **HRMS** (EI, m/z): calcd for C<sub>35</sub>H<sub>34</sub>N<sub>2</sub>O<sub>4</sub>S [M]<sup>+</sup>: 578.2234, found: 578.2237; [α]<sub>D</sub><sup>25</sup> = +42.0 (c 1.00, CH<sub>2</sub>Cl<sub>2</sub>); 94% ee, 11:1 dr; **HPLC** (Chiralpak IA, hexane/ethyl acetate = 70/30, 1.0 mL/min, 254 nm) t<sub>R</sub> = 9.20 min (major), 13.87 min (minor).

**2-((1*R*,4*S*)-2-((4-Bromophenyl)sulfonyl)-4-(4-methoxyphenyl)-9-methyl-2,3,4,9-tetrahydro-1*H*-pyrido[3,4-*b*]indol-1-yl)-1-(4-chlorophenyl)ethan-1-one (3s)**

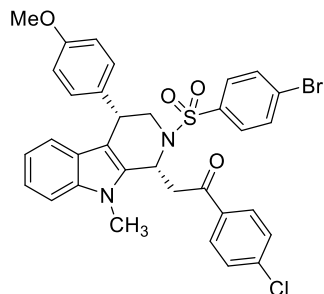

57.8 mg, 87% yield, light yellow solid, m.p. 171–173 °C; **<sup>1</sup>H NMR** (400 MHz, CDCl<sub>3</sub>) δ 7.78 – 7.71 (m, 2H), 7.58 – 7.53 (m, 2H), 7.43 – 7.34 (m, 4H), 7.29 – 7.23 (m, 1H), 7.23 – 7.09 (m, 3H), 6.89 – 6.83 (m, 3H), 6.68 (d, *J* = 7.92 Hz, 1H), 6.00 (dd, *J* = 8.07, 2.83 Hz, 1H), 4.29 – 4.17 (m, 2H), 3.80 (s, 3H), 3.71 (s, 3H), 3.68 (d, *J* = 2.32 Hz, 1H), 3.25 – 3.14 (m, 1H), 3.09 (dd, *J* = 16.67, 2.94 Hz, 1H); **<sup>13</sup>C NMR** (100 MHz, CDCl<sub>3</sub>) δ 194.9, 158.9, 140.5, 139.5, 137.5, 134.8, 134.7, 132.9, 132.1 (2C), 129.7 (2C), 129.4 (2C), 129.2 (2C), 128.6 (2C), 127.6, 125.7, 122.1, 120.3, 119.5, 114.2 (2C), 110.4, 109.0, 55.4, 48.6, 48.4, 43.6, 39.4, 30.1.; **HRMS** (EI, m/z): calcd for C<sub>33</sub>H<sub>28</sub><sup>79</sup>BrClN<sub>2</sub>O<sub>4</sub>S [M]<sup>+</sup>: 662.0636, found: 662.0643; calcd for C<sub>33</sub>H<sub>28</sub><sup>81</sup>BrClN<sub>2</sub>O<sub>4</sub>S [M]<sup>+</sup>: 664.0616, found: 664.0613; [α]<sub>D</sub><sup>25</sup> = +33.5 (c 0.20, CH<sub>2</sub>Cl<sub>2</sub>); 94% ee, 5:1 dr; **HPLC** (Chiralpak IA, hexane/isopropanol = 70/30, 1.0 mL/min, 254 nm) t<sub>R</sub> = 12.44 min (major), 22.88 min (minor).

**1-(4-Chlorophenyl)-2-((1*R*,4*S*)-9-methyl-4-(*p*-tolyl)-2-tosyl-2,3,4,9-tetrahydro-1*H*-pyrido[3,4-*b*]indol-1-yl)ethan-1-one (3t)**

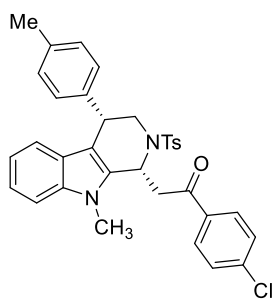

52.4 mg, 90% yield, light yellow solid, m.p. 183-185 °C;  $^1\text{H NMR}$  (400 MHz,  $\text{CDCl}_3$ )  $\delta$  7.81 – 7.76 (m, 2H), 7.57 (d,  $J$  = 8.21 Hz, 2H), 7.43 – 7.36 (m, 2H), 7.29 – 7.22 (m, 1H), 7.18 – 7.07 (m, 5H), 7.01 (d,  $J$  = 8.08 Hz, 2H), 6.89 – 6.80 (m, 1H), 6.66 (d,  $J$  = 7.90 Hz, 1H), 6.00 (dd,  $J$  = 7.78, 3.11 Hz, 1H), 4.27 – 4.14 (m, 2H), 3.73 (s, 3H), 3.71 – 3.66 (m, 1H), 3.24 – 3.08 (m, 2H), 2.35 (s, 3H), 2.22 (s, 3H);  $^{13}\text{C NMR}$  (100 MHz,  $\text{CDCl}_3$ )  $\delta$  195.2, 143.5, 140.2, 138.2, 137.6, 137.3, 136.9, 135.2, 135.0, 129.8 (2C), 129.5(3) (2C), 129.5(1) (2C), 129.1 (2C), 128.8, 128.3 (2C), 127.1 (2C), 121.9, 120.3, 119.4, 110.2, 109.0, 48.5, 48.4, 43.9, 39.5, 30.1, 21.5, 21.3; **HRMS** (EI,  $m/z$ ): calcd for  $\text{C}_{34}\text{H}_{31}\text{ClN}_2\text{O}_3\text{S}$   $[\text{M}]^+$ : 582.1738, found: 582.1747;  $[\alpha]_{\text{D}}^{25} = +30.0$  ( $c$  0.20,  $\text{CH}_2\text{Cl}_2$ ); 87% ee, 10:1 dr; **HPLC** (Chiralpak IA, hexane/isopropanol = 70/30, 1.0 mL/min, 254 nm)  $t_{\text{R}} = 9.15$  min (major), 13.02 min (minor).

**1-(4-Chlorophenyl)-2-((1R,4S)-4-(4-chlorophenyl)-9-methyl-2-tosyl-2,3,4,9-tetrahydro-1H-pyrido[3,4-b]indol-1-yl)ethan-1-one (3u)**

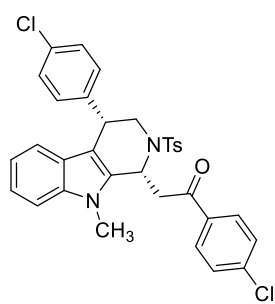

36.2 mg, 60% yield, light yellow solid, m.p. 225-227 °C;  $^1\text{H NMR}$  (400 MHz,  $\text{CDCl}_3$ )  $\delta$  7.78 (d,  $J$  = 8.3 Hz, 2H), 7.57 (d,  $J$  = 8.0 Hz, 2H), 7.40 (d,  $J$  = 8.3 Hz, 2H), 7.30 – 7.24 (m, 3H), 7.20 – 7.10 (m, 3H), 7.02 (d,  $J$  = 8.0 Hz, 2H), 6.91 – 6.82 (m, 1H), 6.66 – 6.59 (m, 1H), 6.01 (dd,  $J$  = 7.7, 3.0 Hz, 1H), 4.21 (dt,  $J$  = 10.8, 6.0 Hz, 2H), 3.72 (s, 3H), 3.66 (d,  $J$  = 7.6 Hz, 1H), 3.22 – 3.03 (m, 2H), 2.22 (s, 3H);  $^{13}\text{C NMR}$  (100 MHz,  $\text{CDCl}_3$ )  $\delta$  195.0, 143.6, 140.3, 139.8, 137.6, 137.2, 135.4, 134.9, 133.0, 129.8 (2C), 129.8 (2C), 129.5 (2C), 129.1 (2C), 129.0 (2C), 127.1 (2C), 125.6, 122.1, 120.0, 119.5, 109.5, 109.1, 48.3, 48.3, 43.8, 39.5, 30.1, 21.5; **HRMS** (EI,  $m/z$ ): calcd for  $\text{C}_{33}\text{H}_{28}\text{Cl}_2\text{N}_2\text{O}_3\text{S}$   $[\text{M}]^+$ : 602.1192, found: 602.1201;  $[\alpha]_{\text{D}}^{25} = +37.0$  ( $c$  0.20,  $\text{CH}_2\text{Cl}_2$ ); 96% ee, 12:1 dr; **HPLC** (Chiralpak IA, hexane/isopropanol = 70/30, 1.0 mL/min, 254 nm)  $t_{\text{R}} = 11.30$  min (major), 17.83 min (minor).

**1-(4-Chlorophenyl)-2-((1R,4R)-4-(2-methoxyphenyl)-9-methyl-2-tosyl-2,3,4,9-tetrahydro-1H-pyrido[3,4-b]indol-1-yl)ethan-1-one (3v)**

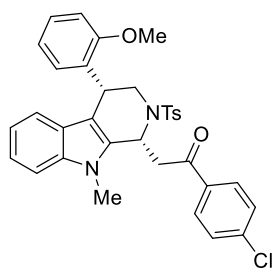

28.8 mg, 48% yield, light yellow solid, m.p. 175–177 °C;  $^1\text{H NMR}$  (400 MHz,  $\text{CDCl}_3$ )  $\delta$  7.83 (d,  $J$  = 8.5 Hz, 2H), 7.59 (d,  $J$  = 8.1 Hz, 2H), 7.41 (d,  $J$  = 8.5 Hz, 2H), 7.27 (d,  $J$  = 1.8 Hz, 1H), 7.24 (d,  $J$  = 5.6 Hz, 1H), 7.13 (t,  $J$  = 7.5 Hz, 1H), 7.03 – 6.92 (m, 4H), 6.87 – 6.79 (m, 2H), 6.67 (d,  $J$  = 7.9 Hz, 1H), 5.97 (dd,  $J$  = 7.8, 3.4 Hz, 1H), 4.53 (dd,  $J$  = 10.7, 6.2 Hz, 1H), 4.39 (dd,  $J$  = 14.3, 6.2 Hz, 1H), 3.88 (s, 3H), 3.74 (s, 3H), 3.70 (t,  $J$  = 7.0 Hz, 1H), 3.21 – 3.09 (m, 2H), 2.19 (s, 3H);  $^{13}\text{C NMR}$  (100 MHz,  $\text{CDCl}_3$ )  $\delta$  195.3, 157.6, 143.3, 140.1, 137.4, 137.2, 135.3, 135.1, 129.8 (2C), 129.3 (2C), 129.0 (2C), 128.9, 128.9, 128.1, 127.0 (2C), 125.7, 121.7, 120.7, 120.3, 119.1, 110.6, 109.5, 108.9, 55.6, 48.6, 46.0, 43.9, 32.4, 30.0, 21.4; **HRMS** (EI,  $m/z$ ): calcd for  $\text{C}_{34}\text{H}_{31}\text{ClN}_2\text{O}_4\text{S}$   $[\text{M}]^+$ : 598.1688, found: 598.1690;  $[\alpha]_{\text{D}}^{25} = +17.8$  ( $c$  1.00,  $\text{CH}_2\text{Cl}_2$ ); 60% ee, 20:1 dr; **HPLC** (Chiralpak IA, hexane/isopropanol = 70/30, 1.0 mL/min, 254 nm)  $t_{\text{R}} = 9.72$  min (major), 19.97 min (minor).

**1-(4-Chlorophenyl)-2-((1*R*,4*S*)-4-(3-methoxyphenyl)-9-methyl-2-tosyl-2,3,4,9-tetrahydro-1*H*-pyrido[3,4-*b*]indol-1-yl)ethan-1-one (3w)**

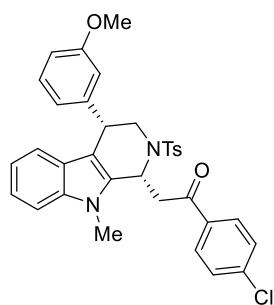

30.0 mg, 50% yield, light yellow solid, m.p. 191–193 °C; <sup>1</sup>H NMR (400 MHz, CDCl<sub>3</sub>) δ 7.79 (d, *J* = 8.6 Hz, 2H), 7.58 (d, *J* = 8.2 Hz, 2H), 7.40 (d, *J* = 8.6 Hz, 2H), 7.28 – 7.23 (m, 2H), 7.14 (t, *J* = 7.6 Hz, 1H), 7.02 (d, *J* = 8.1 Hz, 2H), 6.87 – 6.78 (m, 4H), 6.69 (d, *J* = 7.9 Hz, 1H), 6.01 (dd, *J* = 7.8, 3.1 Hz, 1H), 4.28 – 4.16 (m, 2H), 3.78 (s, 3H), 3.72 (s, 3H), 3.71 – 3.66 (m, 1H), 3.22 (dd, *J* = 13.5, 10.2 Hz, 1H), 3.11 (dd, *J* = 16.5, 3.2 Hz, 1H), 2.22 (s, 3H); <sup>13</sup>C NMR (100 MHz, CDCl<sub>3</sub>) δ 195.0, 159.9, 143.5, 142.9, 140.1, 137.5, 137.2, 135.1, 134.9, 129.7,

129.7 (2C), 129.4 (2C), 129.0 (2C), 127.0 (2C), 125.7, 121.9, 120.7, 120.2, 119.3, 114.5, 112.1, 109.8, 108.9, 55.3, 48.3, 48.2, 43.8, 39.9, 30.0, 21.4; HRMS (EI, m/z): calcd for C<sub>34</sub>H<sub>31</sub>ClN<sub>2</sub>O<sub>4</sub>S [M]<sup>+</sup>: 598.1688, found: 598.1692; [ $\alpha$ ]<sub>D</sub><sup>25</sup> = +22.3 (*c* 1.00, CH<sub>2</sub>Cl<sub>2</sub>); 69% ee, 10:1 dr; HPLC (Chiralpak IA, hexane/isopropanol = 70/30, 1.0 mL/min, 254 nm) t<sub>R</sub> = 11.15 min (major), 18.38 min (minor).

---

## 4. References

- [1] S. K. Davidsen, G. W. Phillips, S. F. Martin, *Org. Synth.*, 1987, **65**, 119.
- [2] C.-P. Yu, Y. Tang, L. Cha, S. Milikisiyants, T. I. Smirnova, A. I. Smirnov, Y. Guo, W.-C. Chang, *J. Am. Chem. Soc.*, 2018, **140**, 15190.



## 5. $^1\text{H}$ NMR and $^{13}\text{C}$ NMR spectra

### $^1\text{H}$ NMR of **3a** in $\text{CDCl}_3$

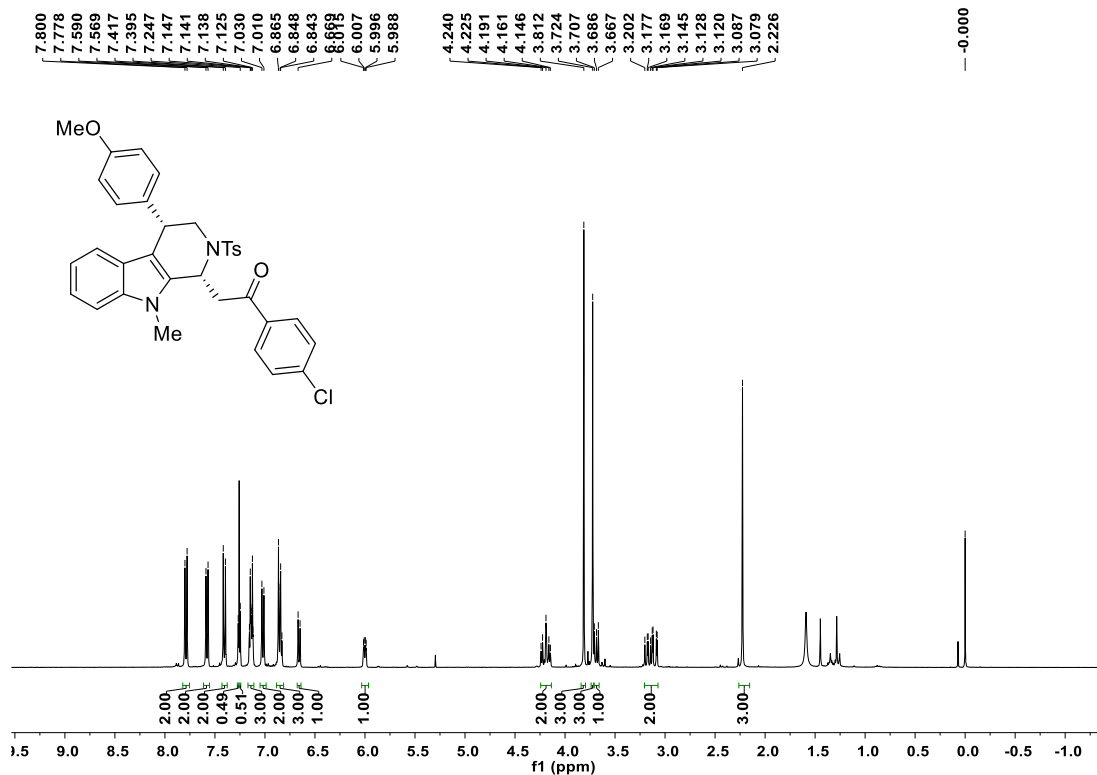

### $^{13}\text{C}$ NMR of **3a** in $\text{CDCl}_3$

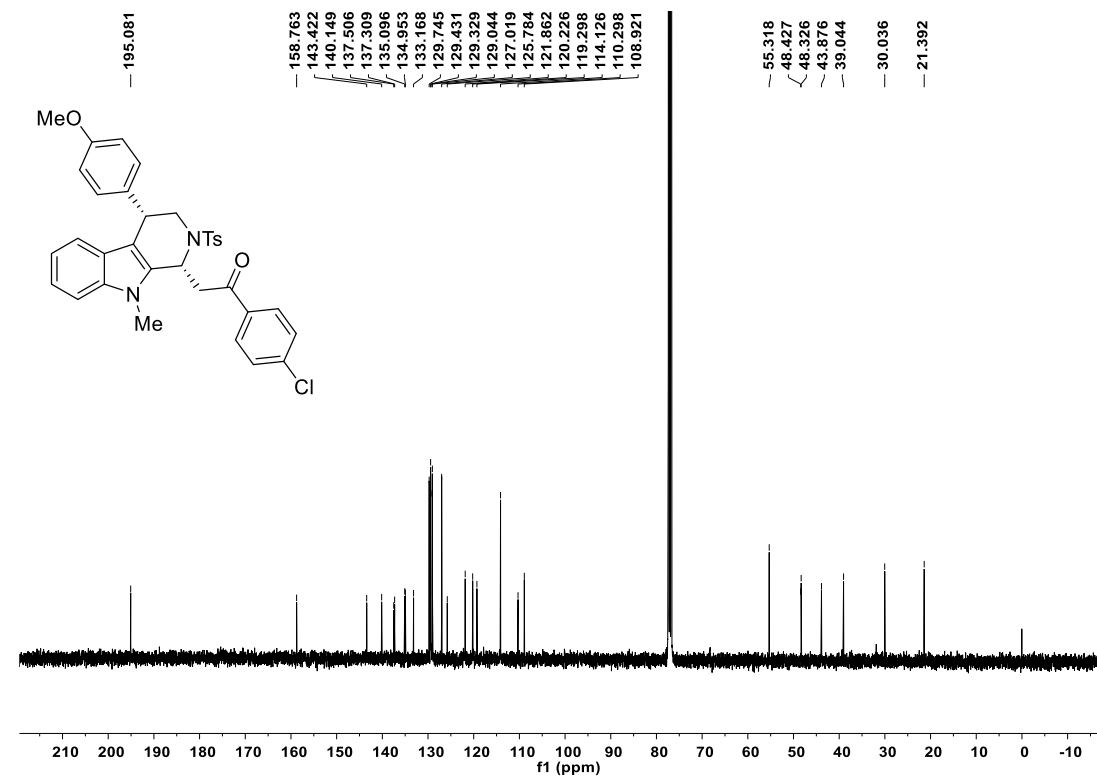

### $^1\text{H}$ NMR of **3b** in $\text{CDCl}_3$

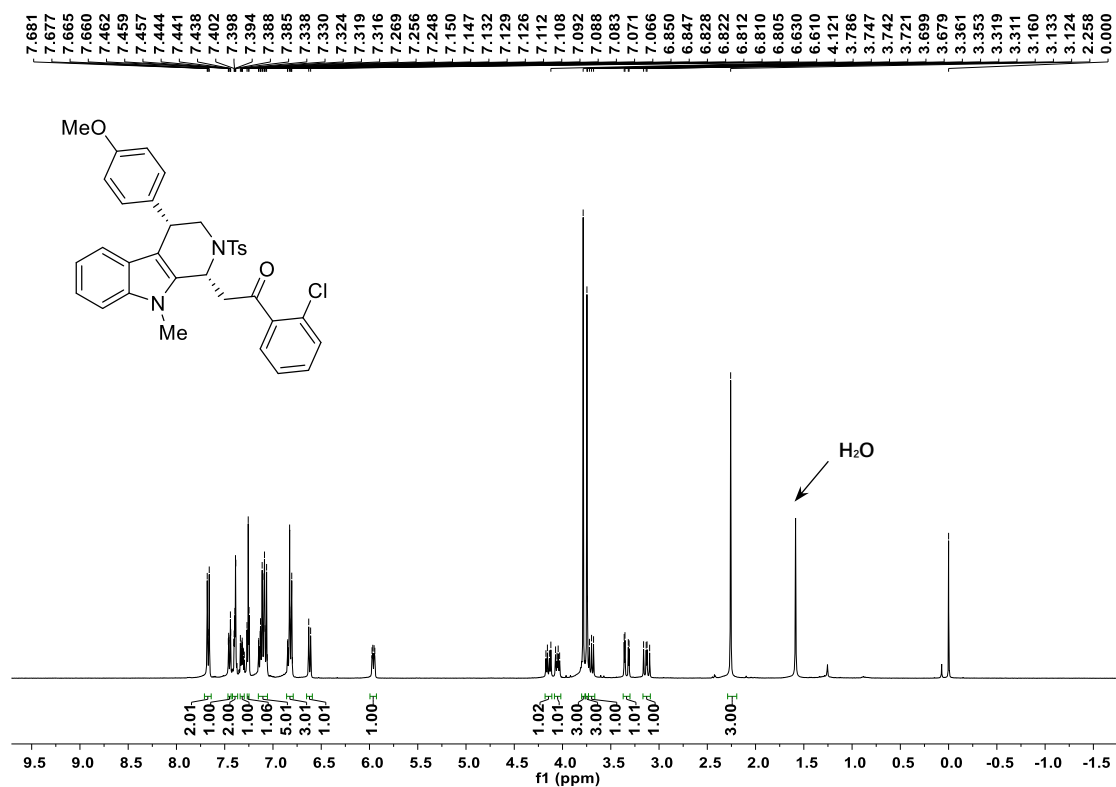

### $^{13}\text{C}$ NMR of **3b** in $\text{CDCl}_3$

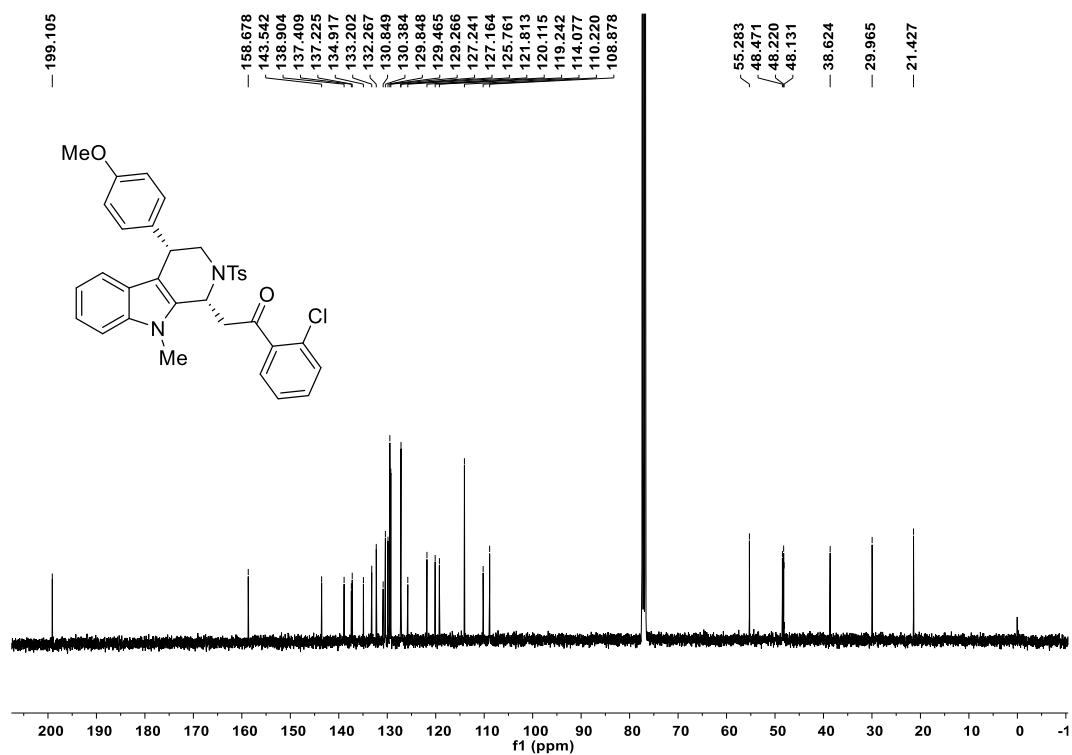

$^1\text{H}$  NMR of **3c** in  $\text{CDCl}_3$  (a mixture of diastereomers, 10:1 dr)

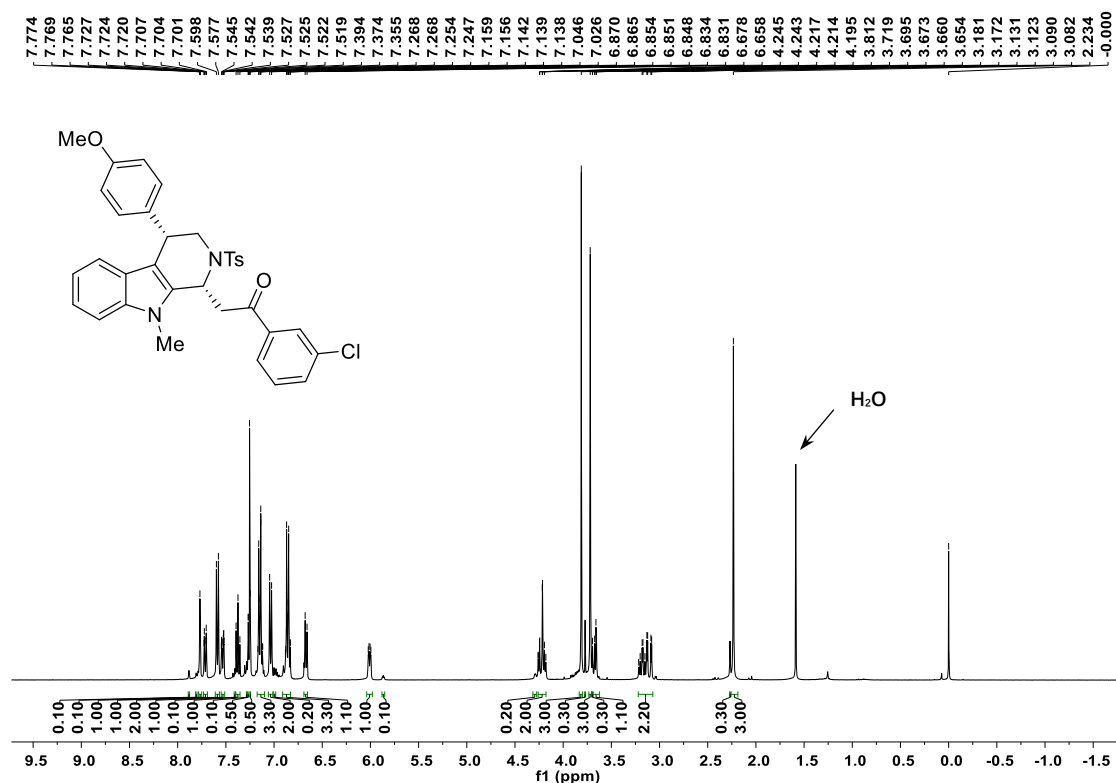

$^{13}\text{C}$  NMR of **3c** in  $\text{CDCl}_3$  (a mixture of diastereomers, 10:1 dr)

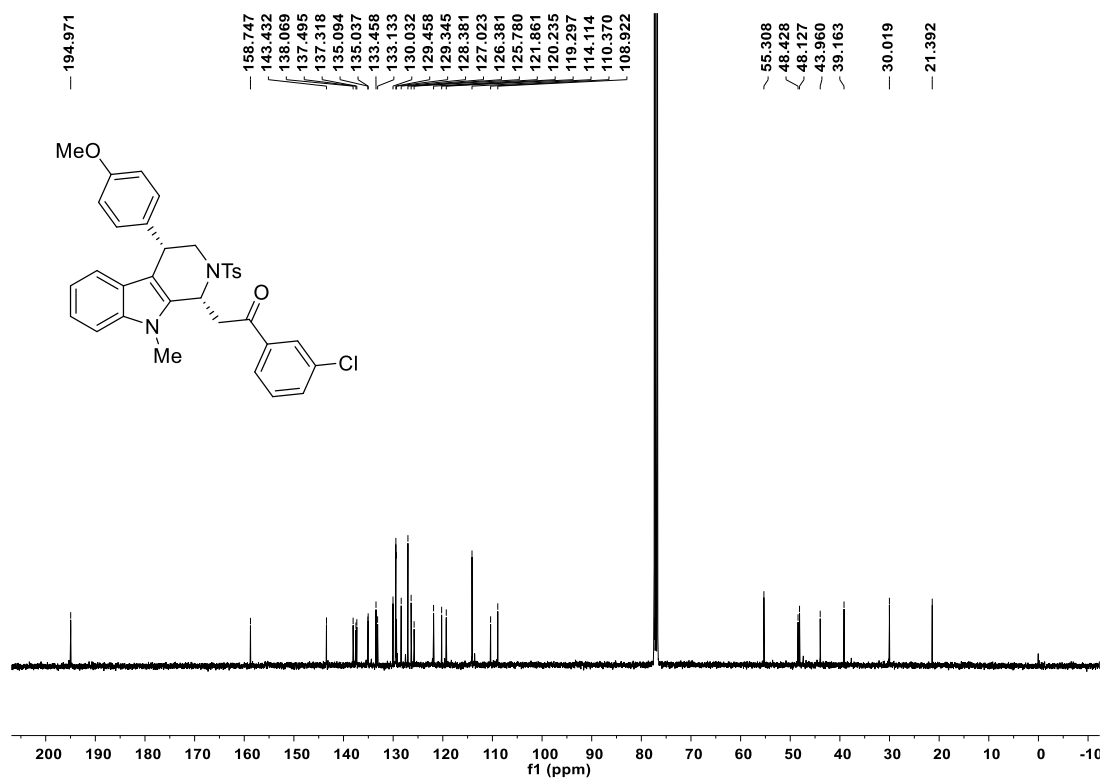

$^1\text{H}$  NMR of **3d** in  $\text{CDCl}_3$  (a mixture of diastereomers, 6:1 dr)

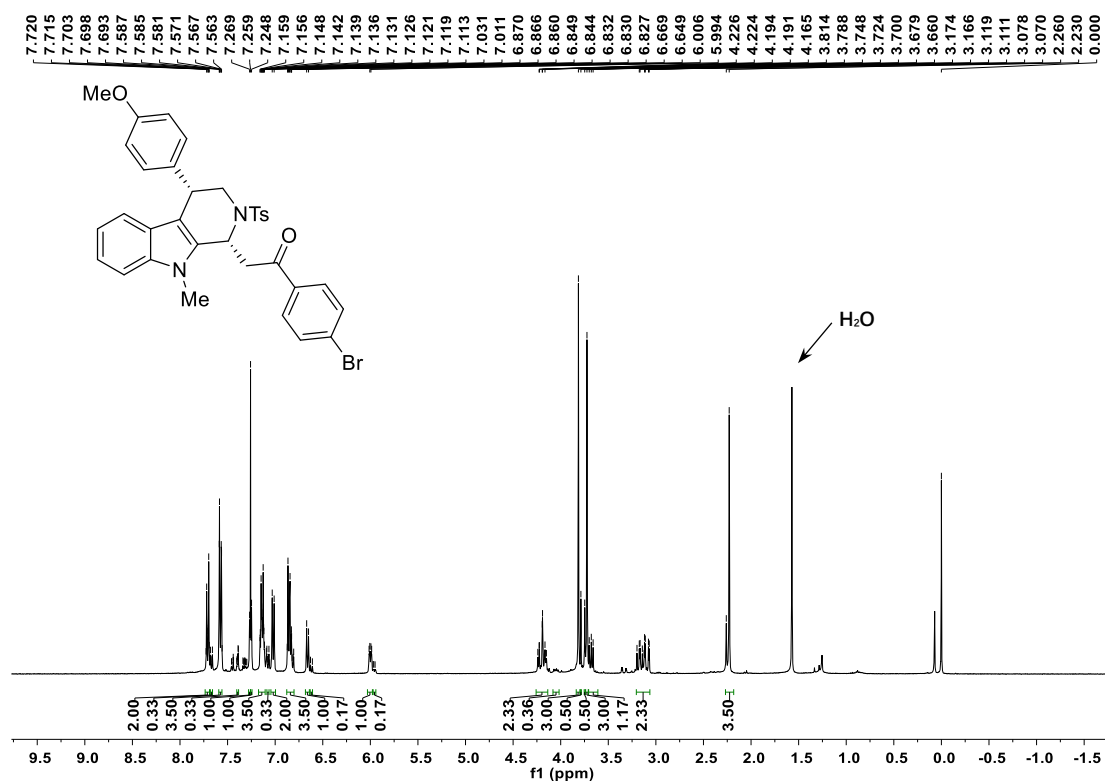

$^{13}\text{C}$  NMR of **3d** in  $\text{CDCl}_3$  (a mixture of diastereomers, 6:1 dr)

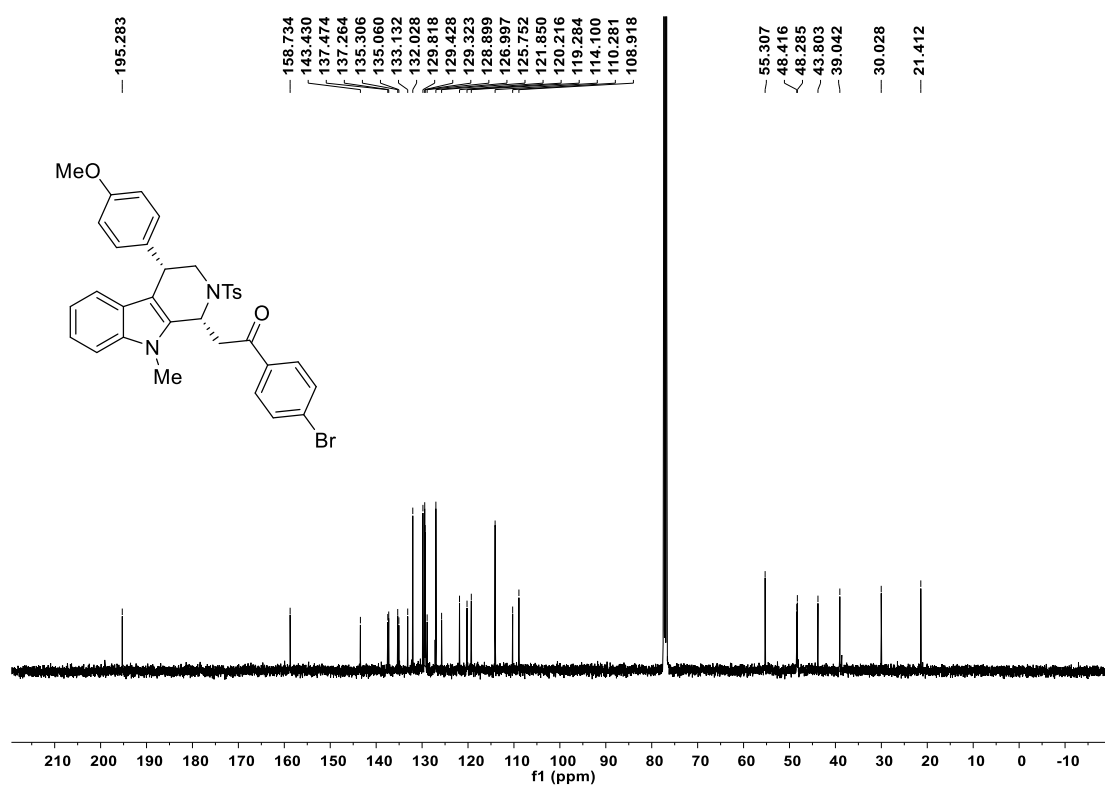

$^1\text{H}$  NMR of **3e** in  $\text{CDCl}_3$  (a mixture of diastereomers, 12.5:1 dr)

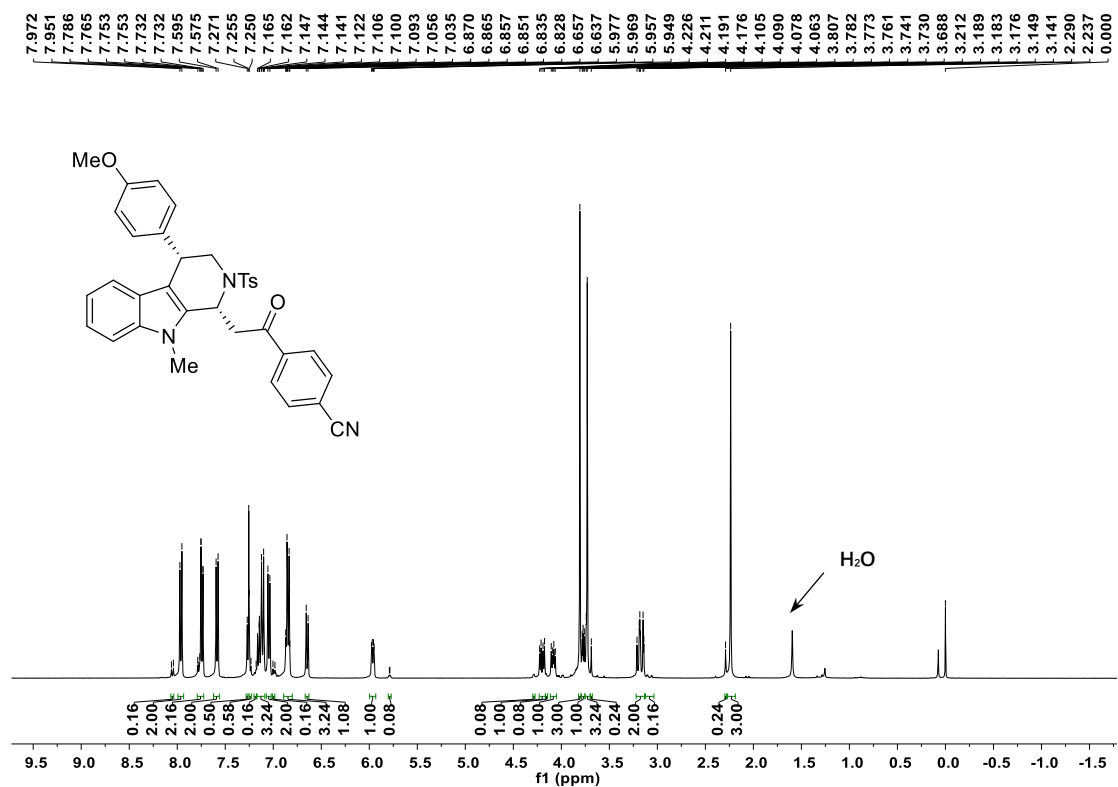

$^{13}\text{C}$  NMR of **3e** in  $\text{CDCl}_3$  (a mixture of diastereomers, 12.5:1 dr)

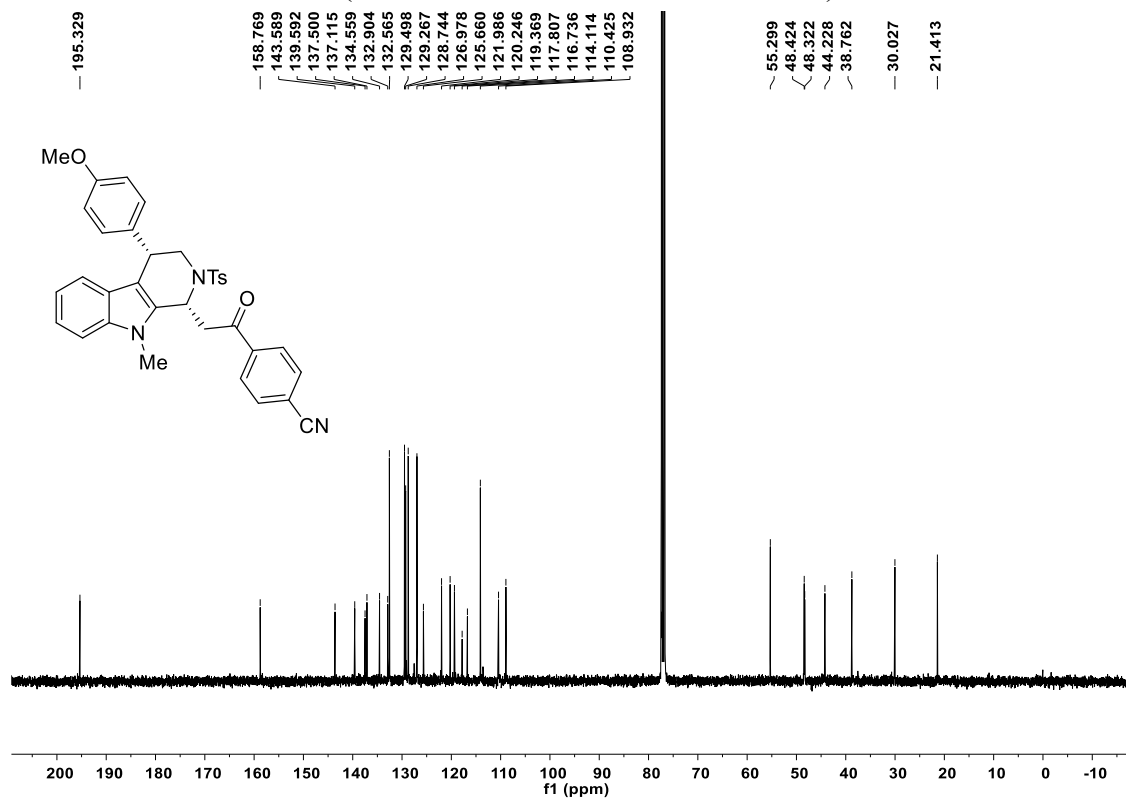

$^1\text{H}$  NMR of **3f** in  $\text{CDCl}_3$  (a mixture of diastereomers, 14:1 dr)

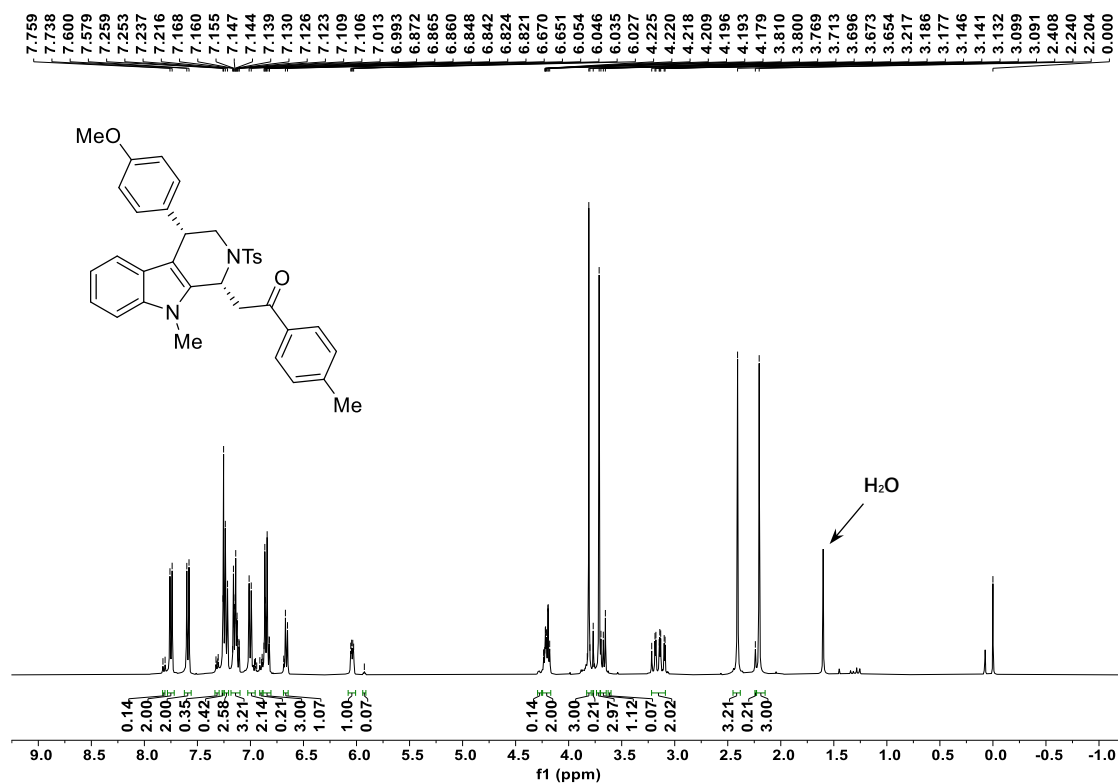

$^{13}\text{C}$  NMR of **3f** in  $\text{CDCl}_3$  (a mixture of diastereomers, 14:1 dr)

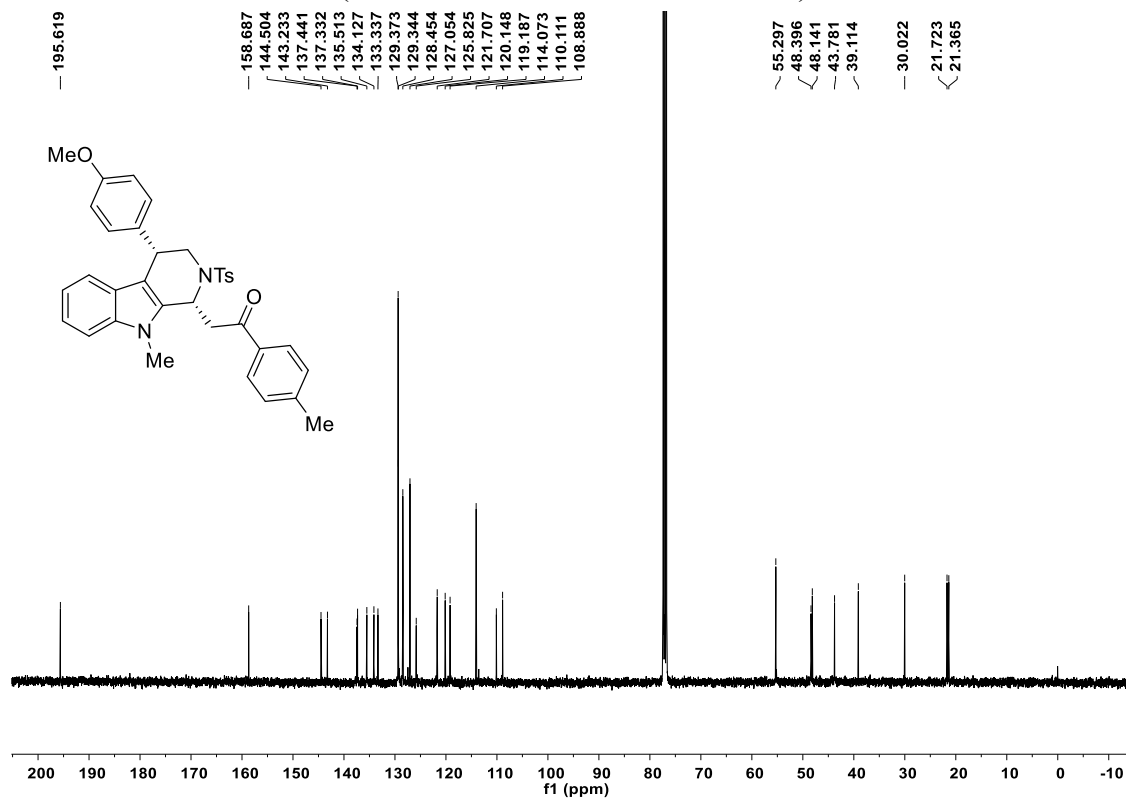

$^1\text{H}$  NMR of **3g** in  $\text{CDCl}_3$  (a mixture of diastereomers, 20:1 dr)

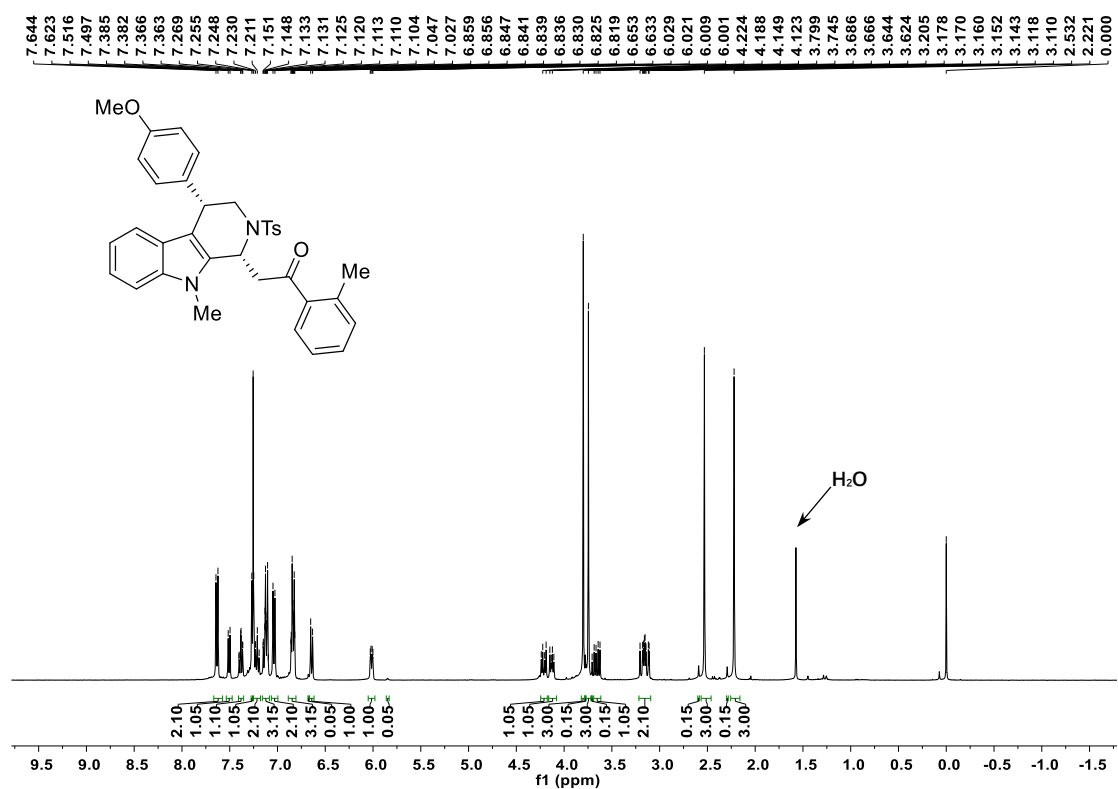

$^{13}\text{C}$  NMR of **3g** in  $\text{CDCl}_3$  (a mixture of diastereomers, 20:1 dr)

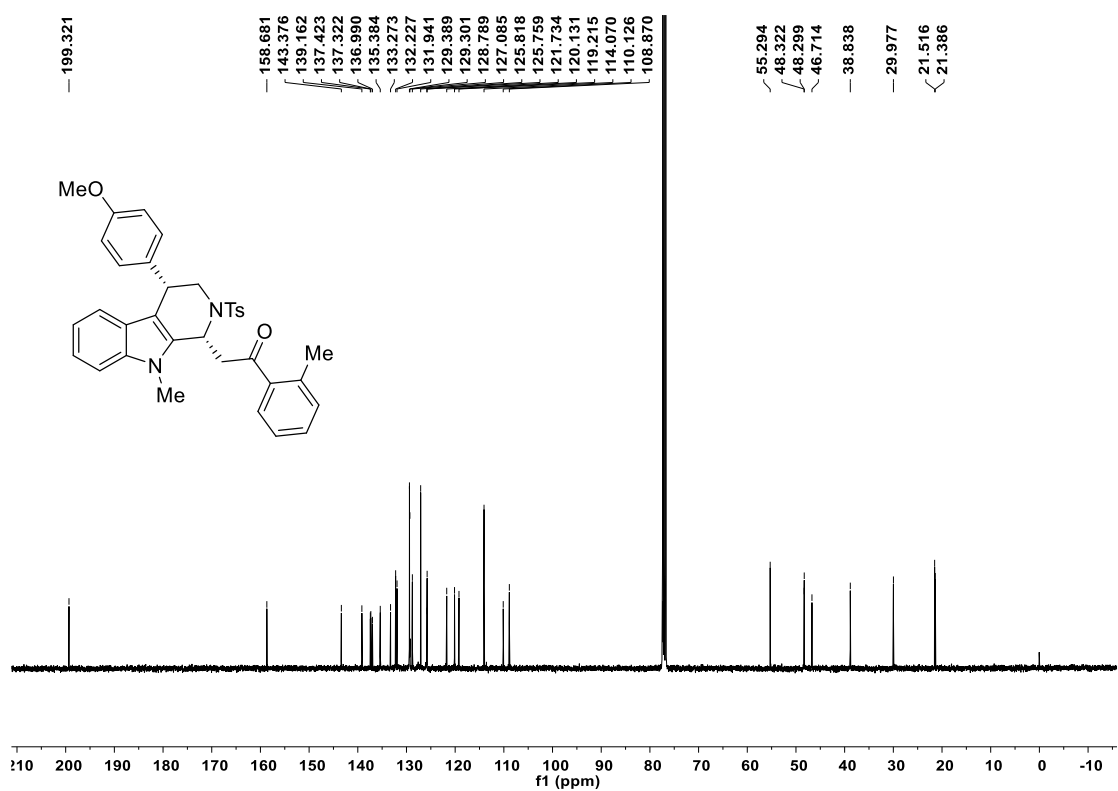

<sup>1</sup>H NMR of **3h** in CDCl<sub>3</sub> (a mixture of diastereomers, 14:1 dr)

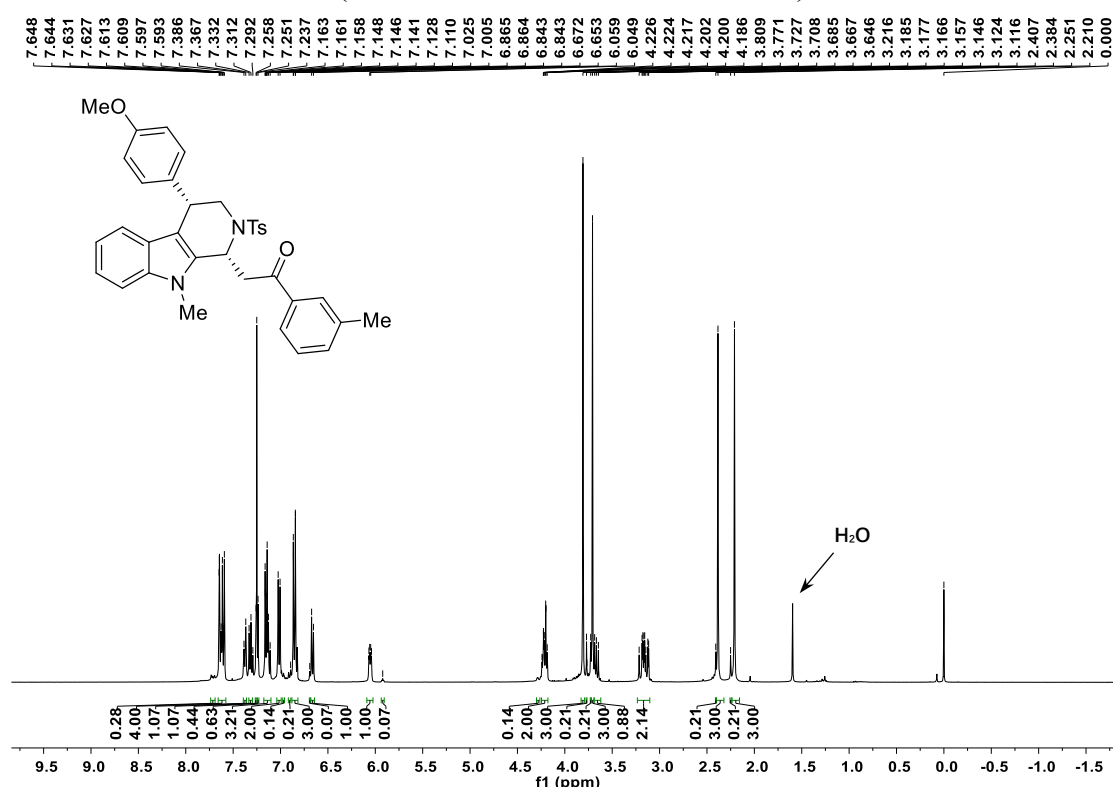

<sup>13</sup>C NMR of **3h** in CDCl<sub>3</sub> (a mixture of diastereomers, 14:1 dr)

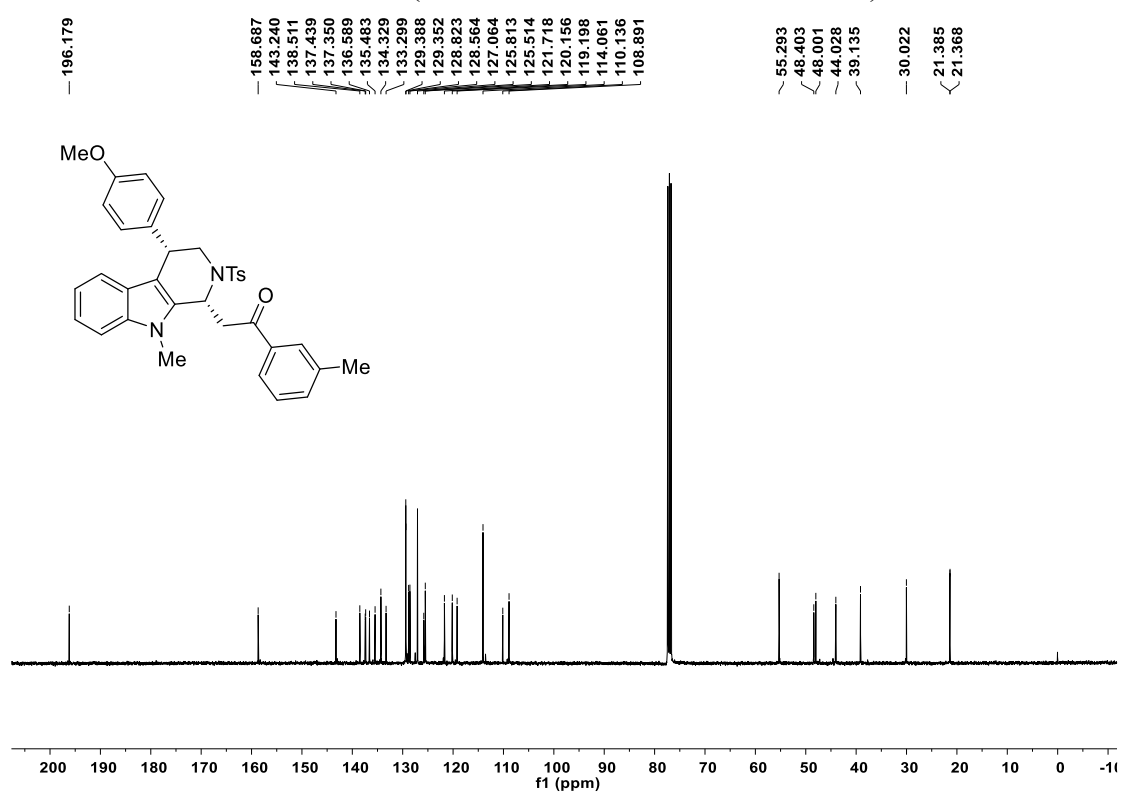



$^1\text{H}$  NMR of **3i** in  $\text{CDCl}_3$  (a mixture of diastereomers, 11:1 dr)

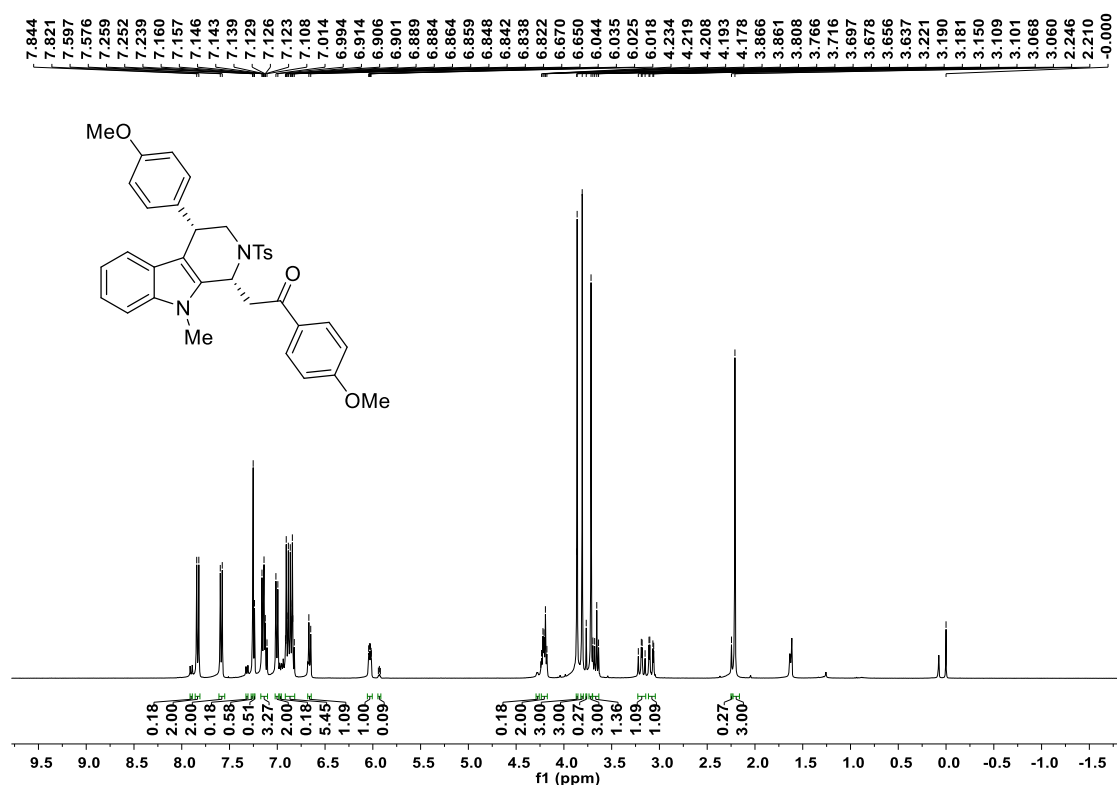

$^{13}\text{C}$  NMR of **3i** in  $\text{CDCl}_3$  (a mixture of diastereomers, 11:1 dr)

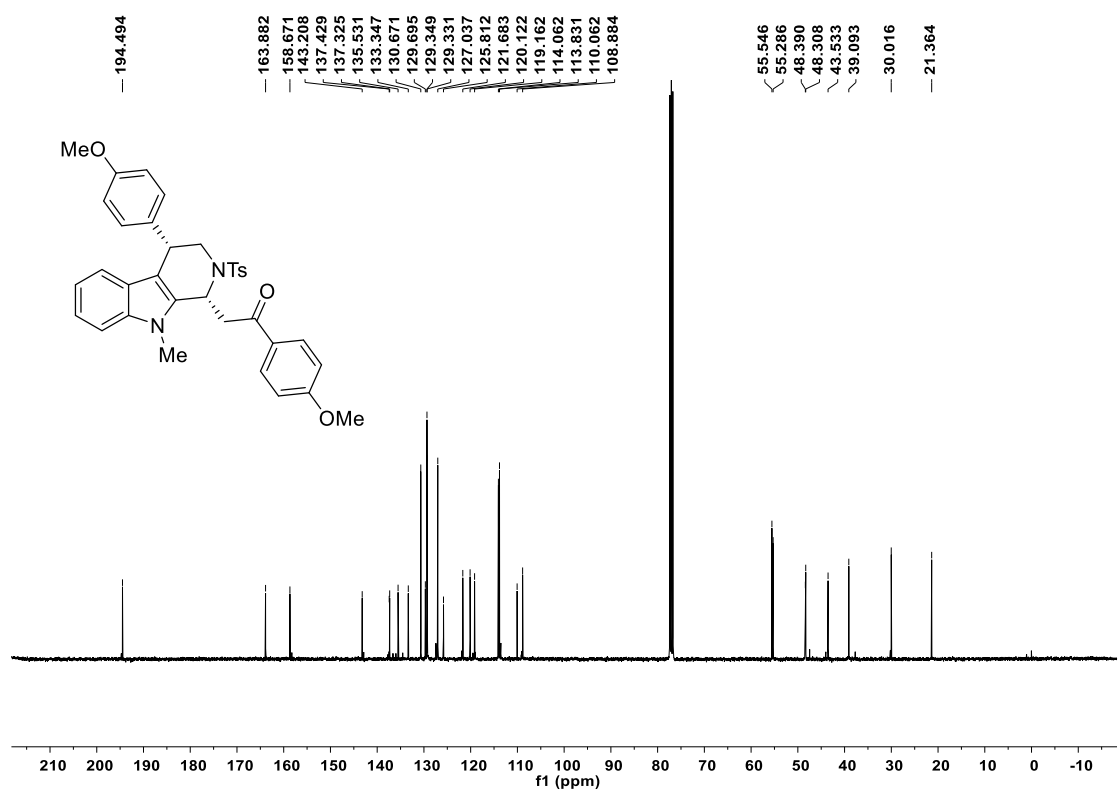

$^1\text{H}$  NMR of **3j** in  $\text{CDCl}_3$  (a mixture of diastereomers, 12.5:1 dr)

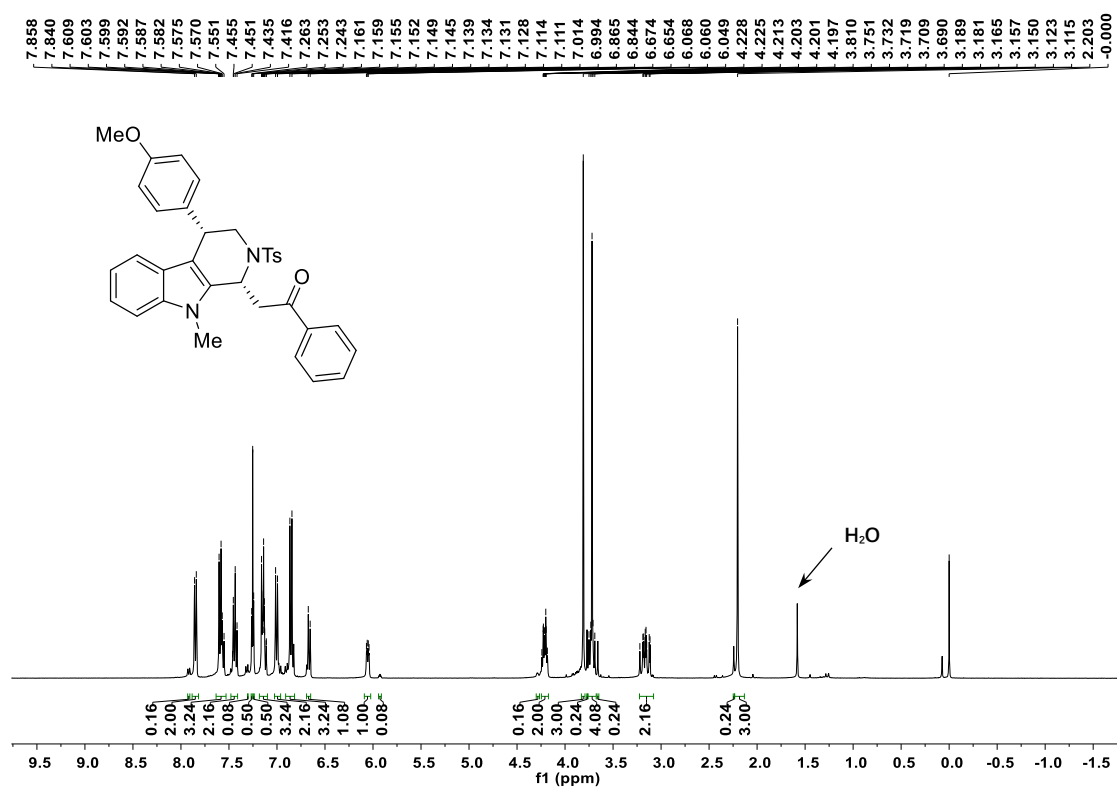

$^{13}\text{C}$  NMR of **3j** in  $\text{CDCl}_3$  (a mixture of diastereomers, 12.5:1 dr)

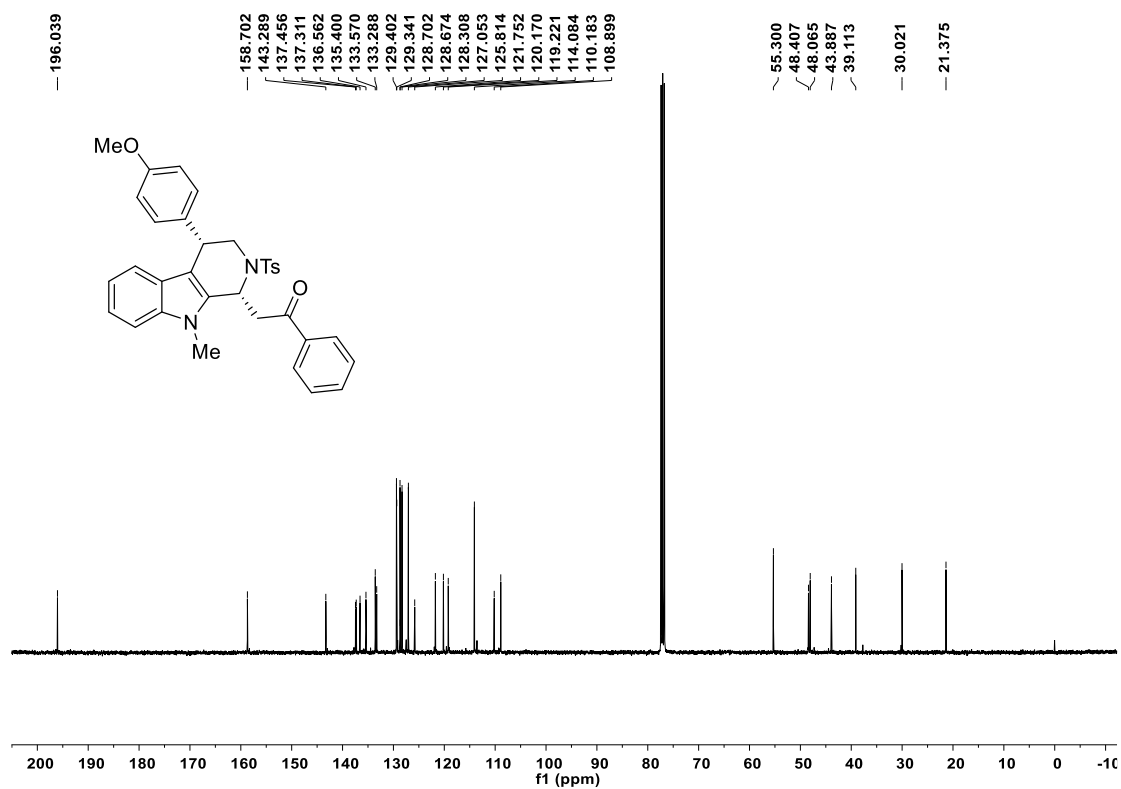

$^1\text{H}$  NMR of **3k** in  $\text{CDCl}_3$  (a mixture of diastereomers, 14:1 dr)

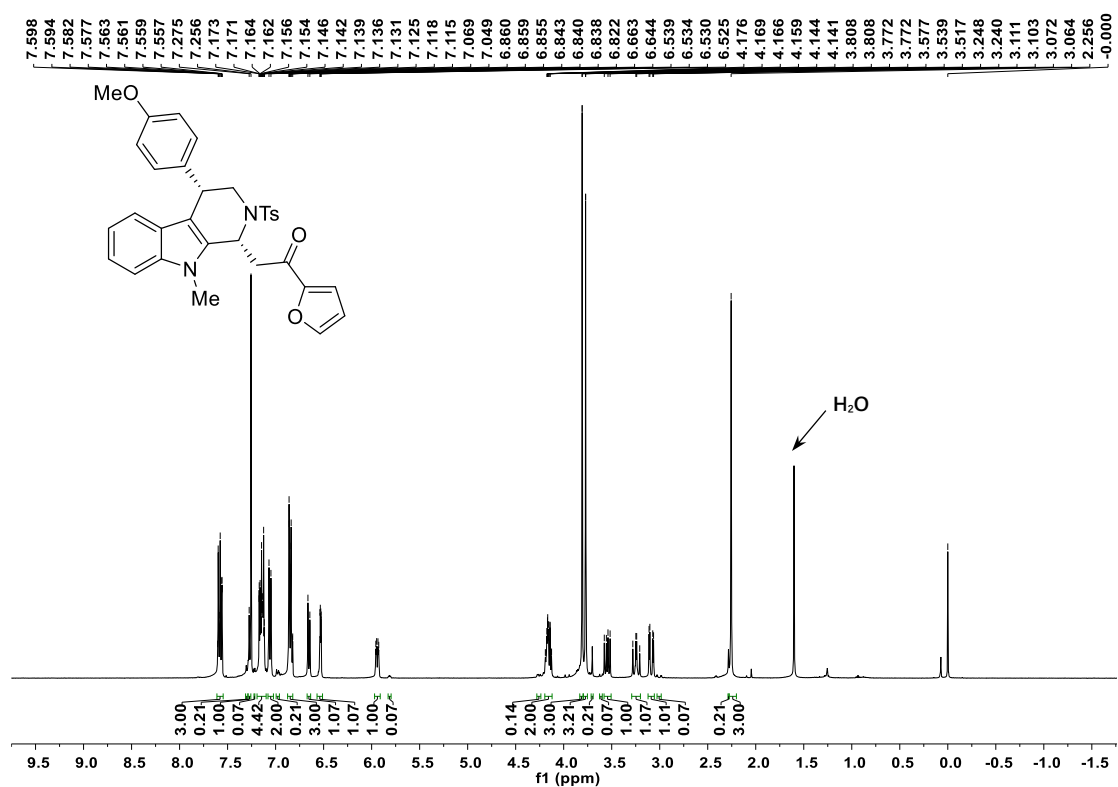

$^{13}\text{C}$  NMR of **3k** in  $\text{CDCl}_3$  (a mixture of diastereomers, 14:1 dr)

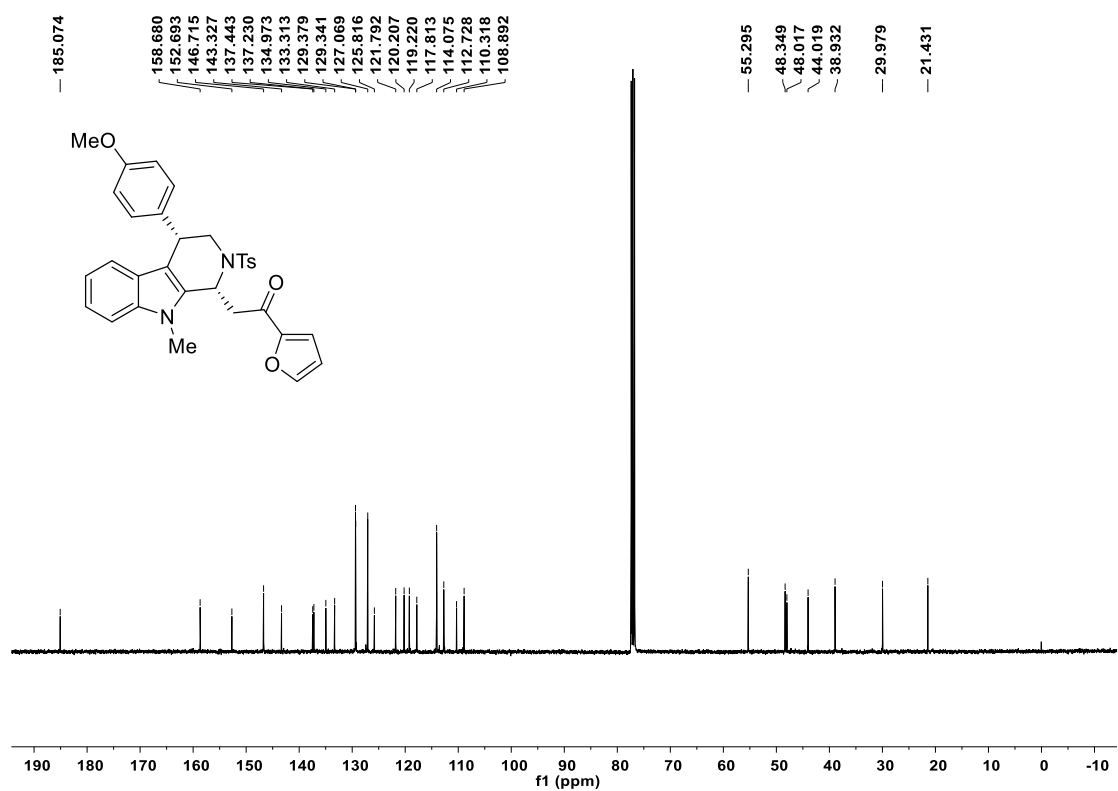

$^1\text{H}$  NMR of **31** in  $\text{CDCl}_3$  (a mixture of diastereomers, 17:1 dr)

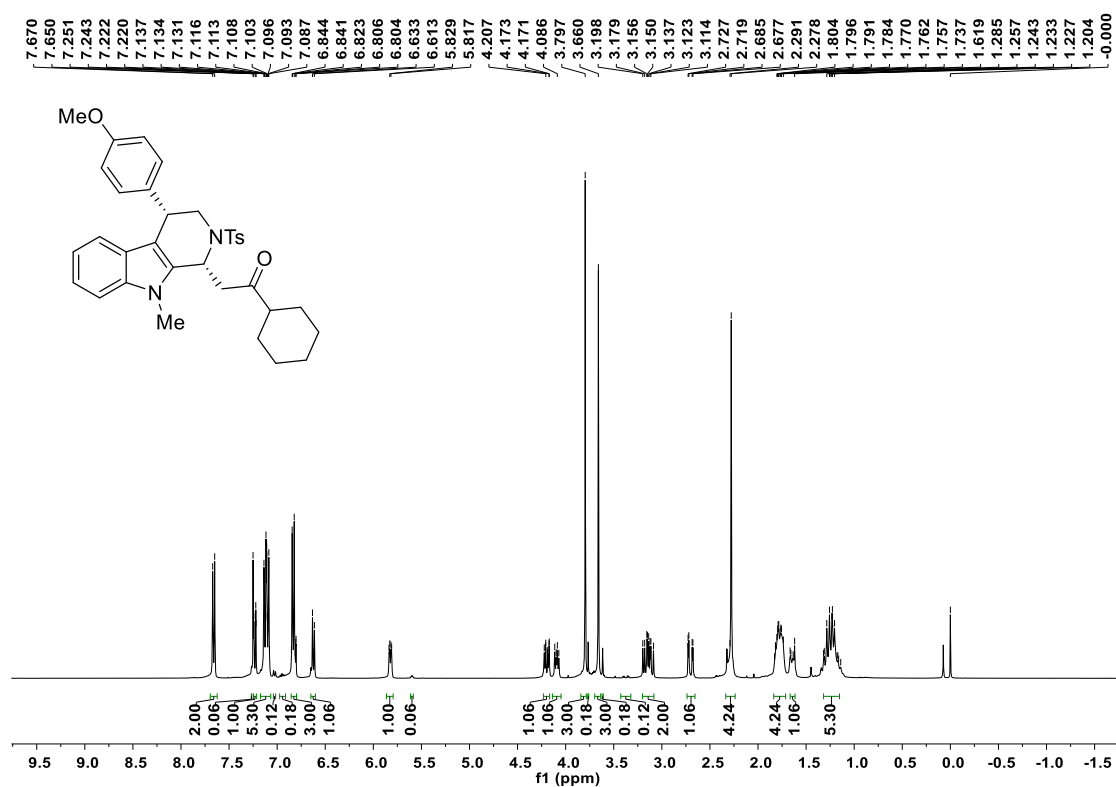

$^{13}\text{C}$  NMR of **31** in  $\text{CDCl}_3$  (a mixture of diastereomers, 17:1 dr)

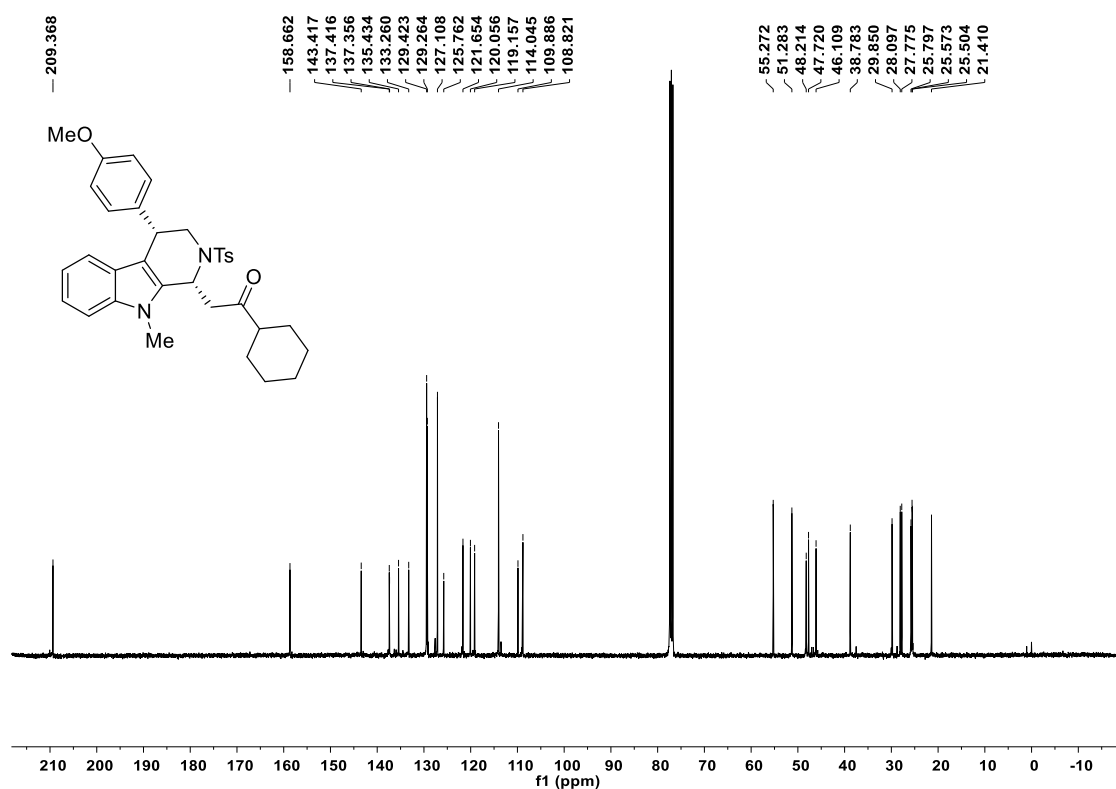

$^1\text{H}$  NMR of **3m** in  $\text{CDCl}_3$  (a mixture of diastereomers, 6:1 dr)

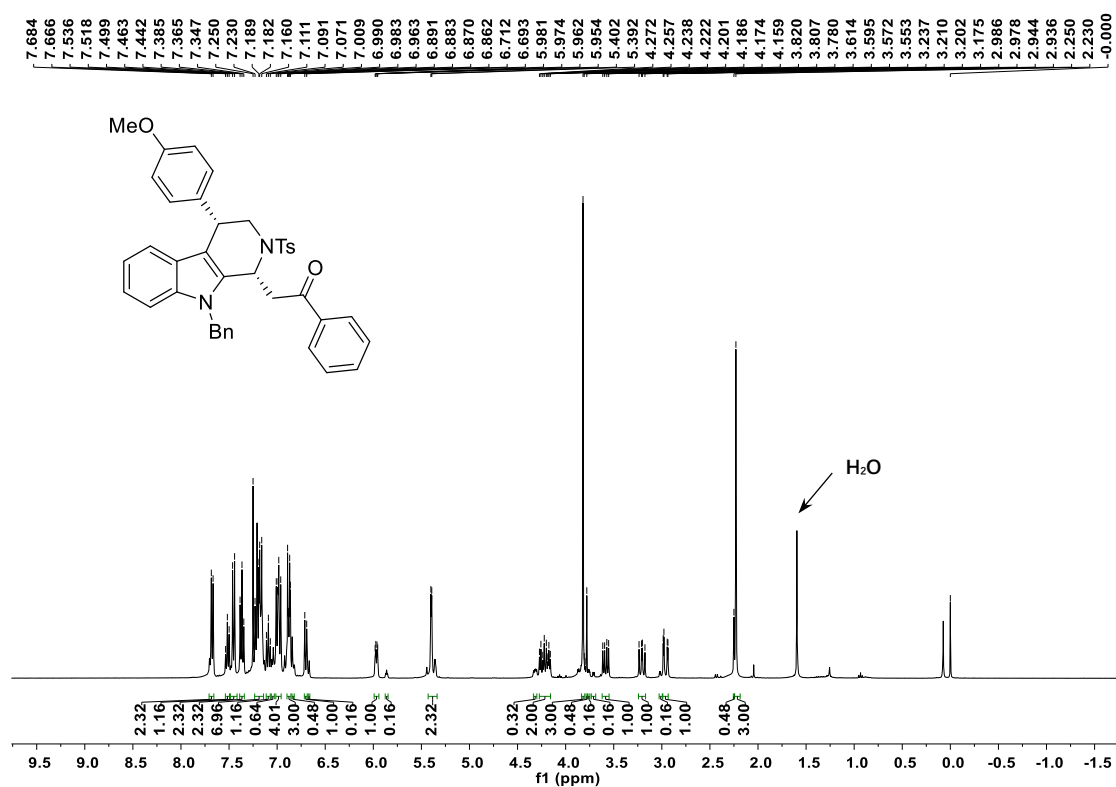

$^{13}\text{C}$  NMR of **3m** in  $\text{CDCl}_3$  (a mixture of diastereomers, 6:1 dr)

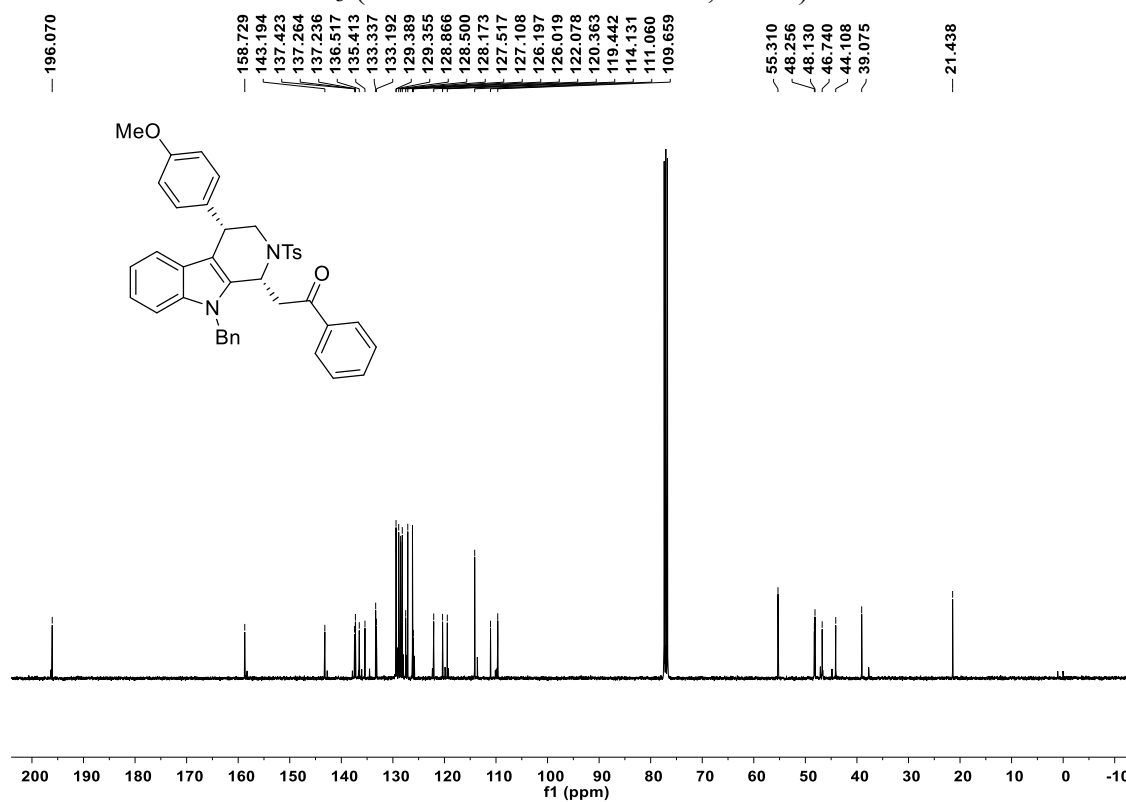

$^1\text{H}$  NMR of **3n** in  $\text{CDCl}_3$

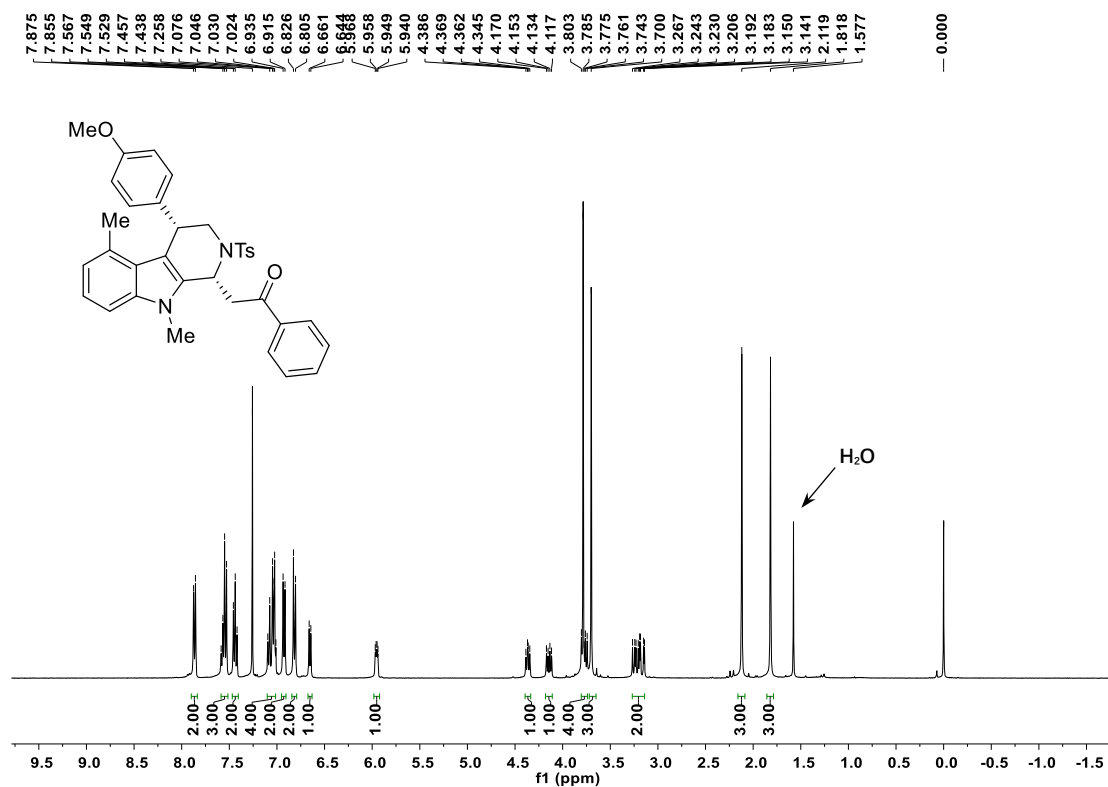

$^{13}\text{C}$  NMR of **3n** in  $\text{CDCl}_3$

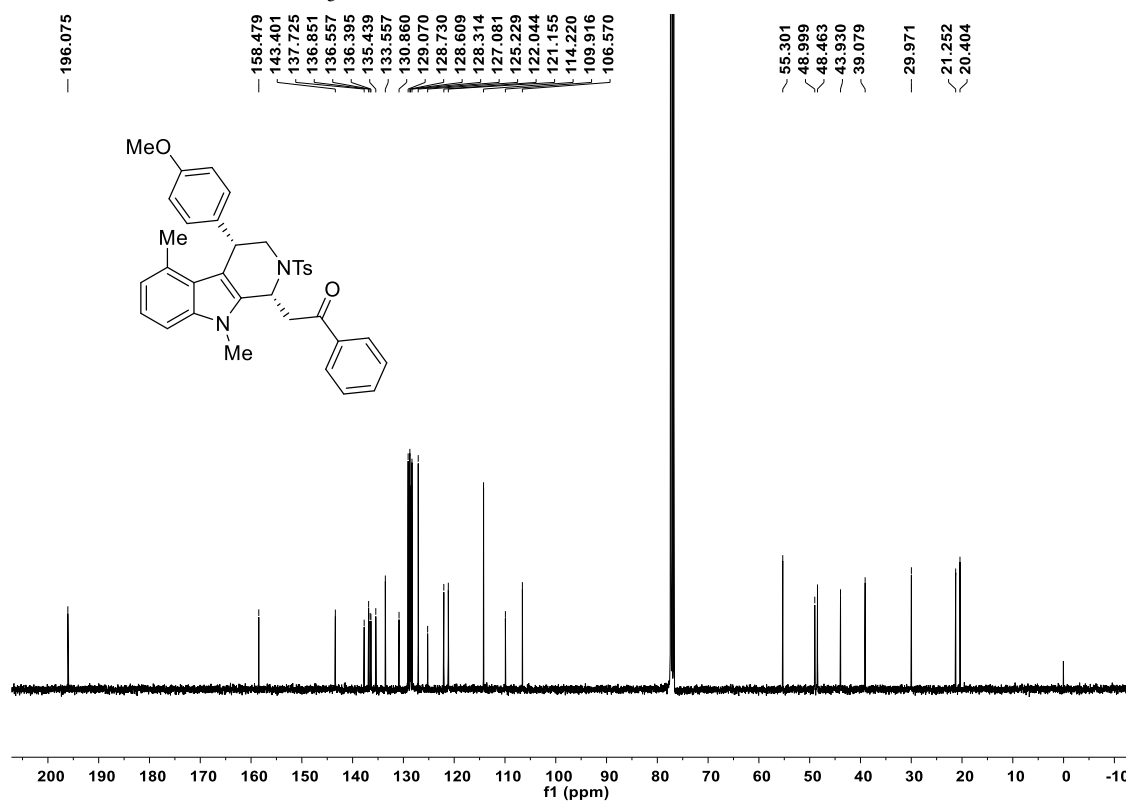

$^1\text{H}$  NMR of **3o** in  $\text{CDCl}_3$  (a mixture of diastereomers, 10:1 dr)

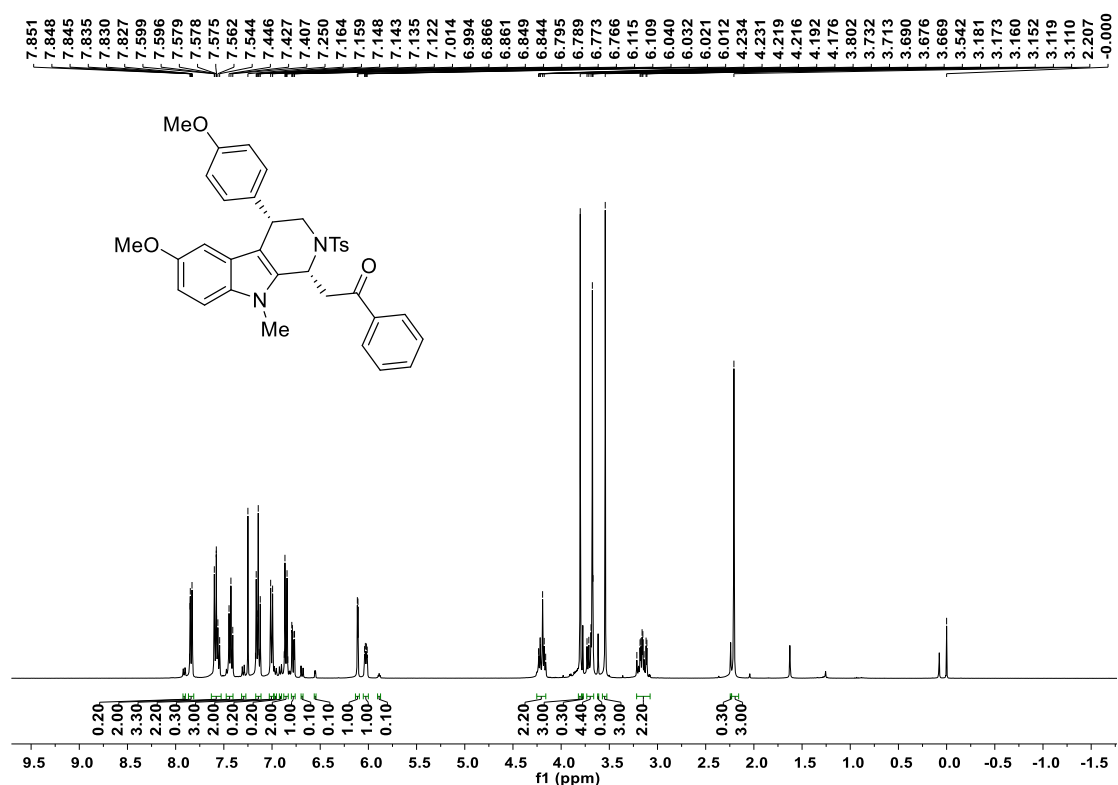

$^{13}\text{C}$  NMR of **3o** in  $\text{CDCl}_3$  (a mixture of diastereomers, 10:1 dr)

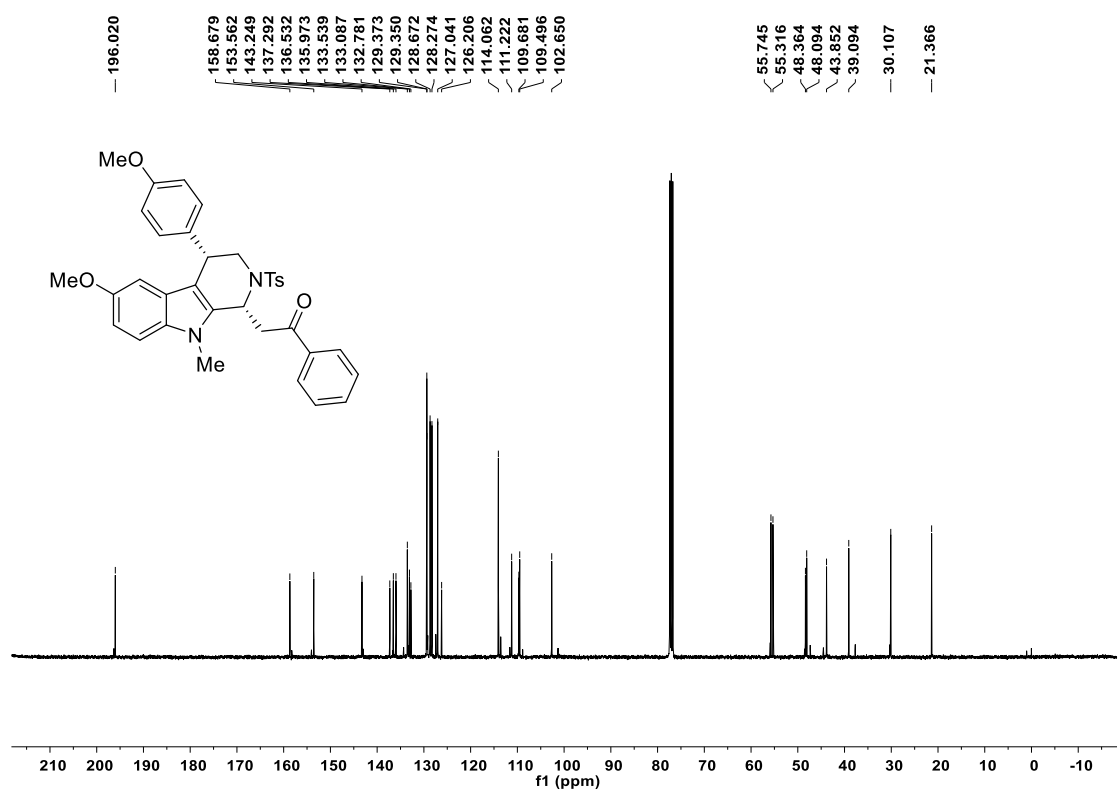

$^1\text{H}$  NMR of **3p** in  $\text{CDCl}_3$  (a mixture of diastereomers, 11:1 dr)

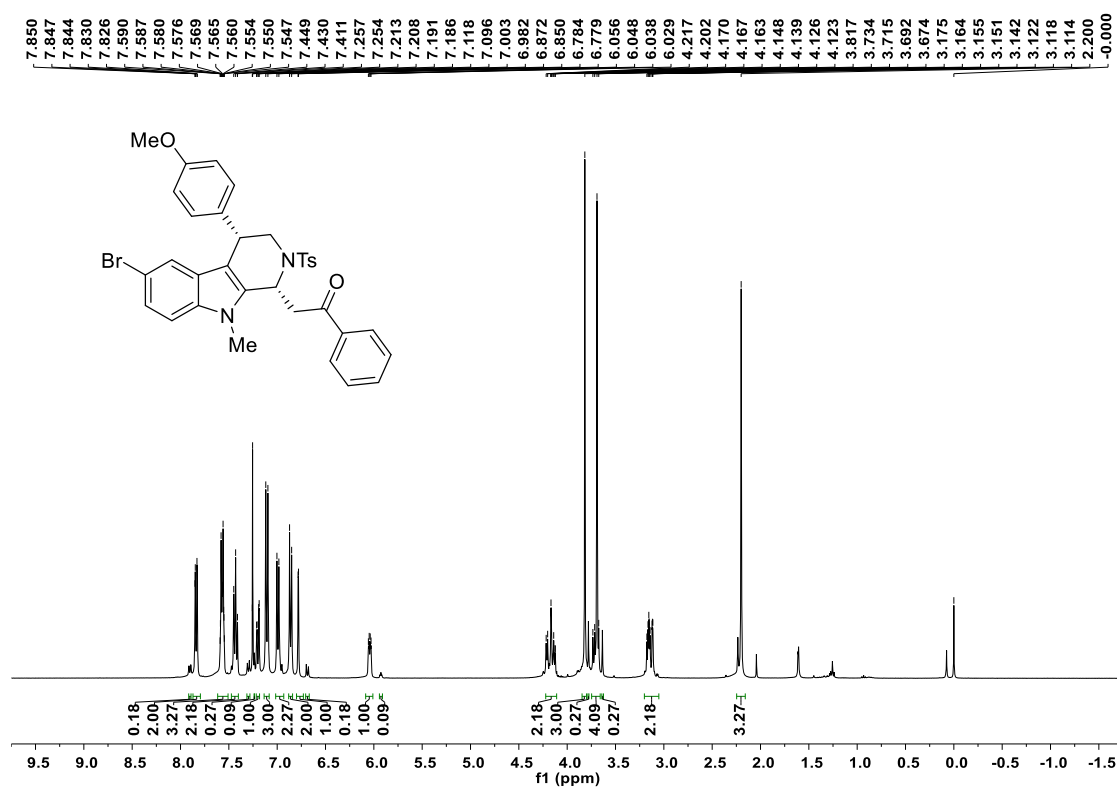

$^{13}\text{C}$  NMR of **3p** in  $\text{CDCl}_3$  (a mixture of diastereomers, 11:1 dr)

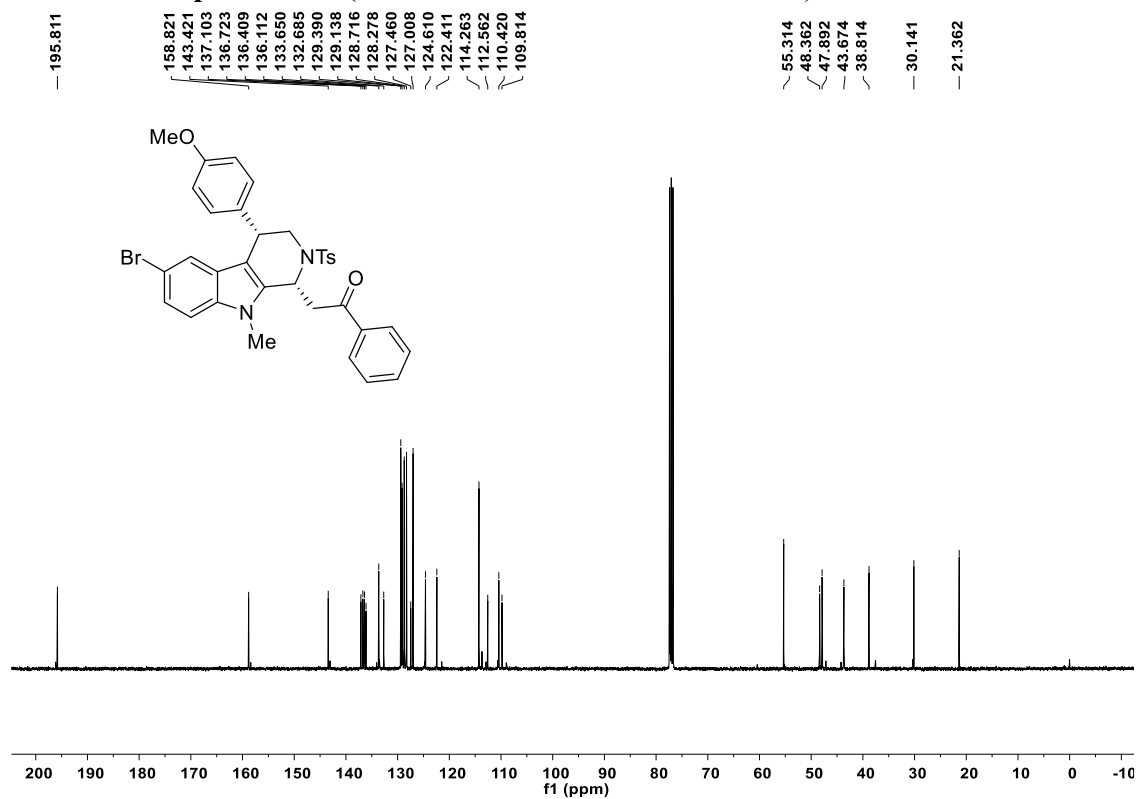



$^1\text{H}$  NMR of **3q** in  $\text{CDCl}_3$  (a mixture of diastereomers, 10:1 dr)

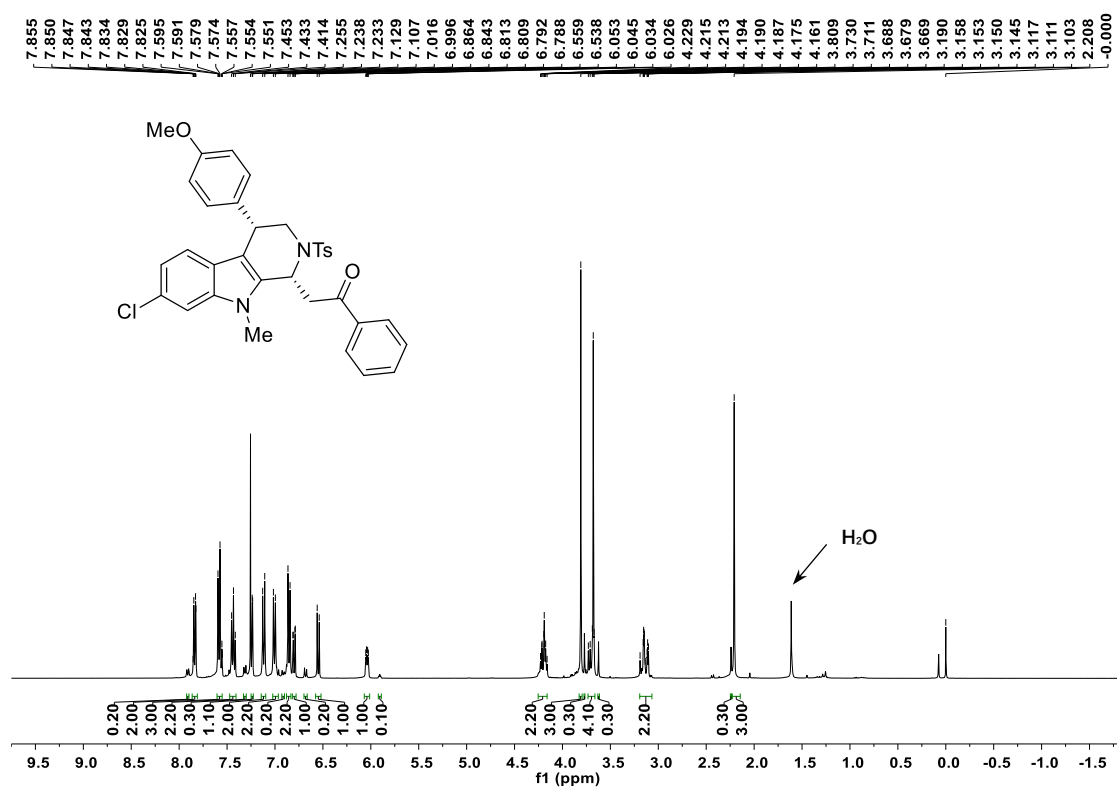

$^{13}\text{C}$  NMR of **3q** in  $\text{CDCl}_3$  (a mixture of diastereomers, 10:1 dr)

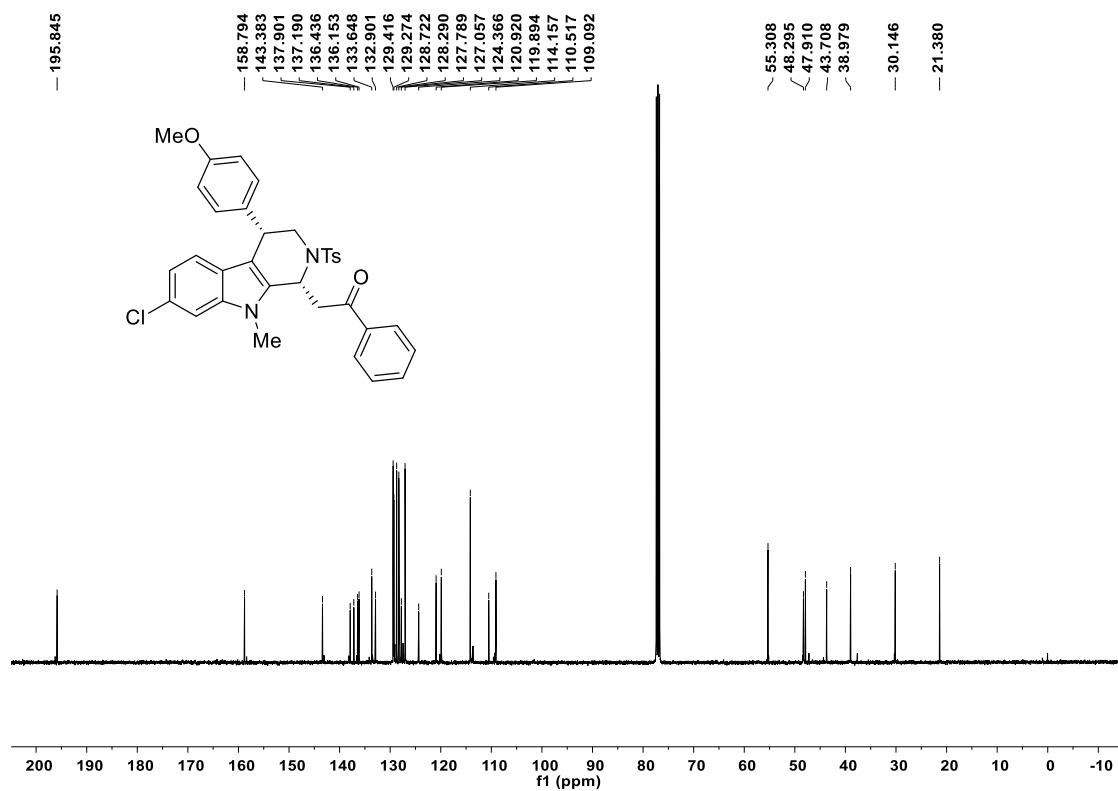

$^1\text{H}$  NMR of **3r** in  $\text{CDCl}_3$  (a mixture of diastereomers, 11:1 dr)

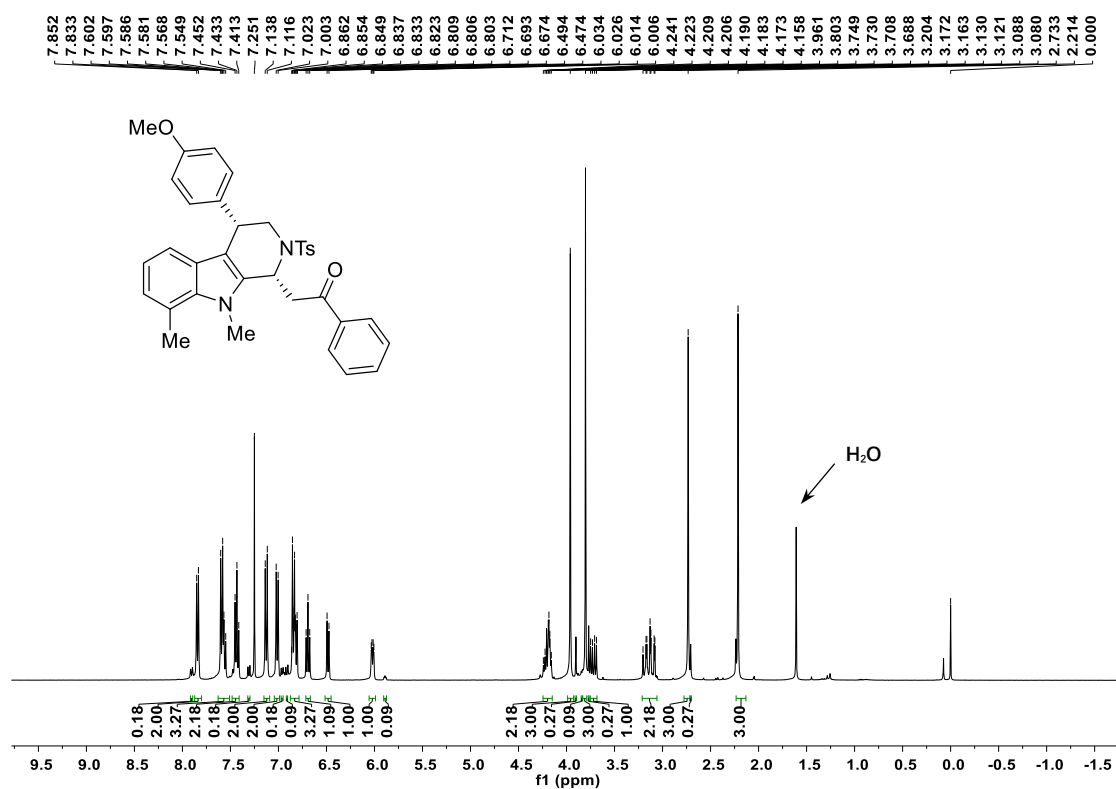

$^{13}\text{C}$  NMR of **3r** in  $\text{CDCl}_3$  (a mixture of diastereomers, 11:1 dr)

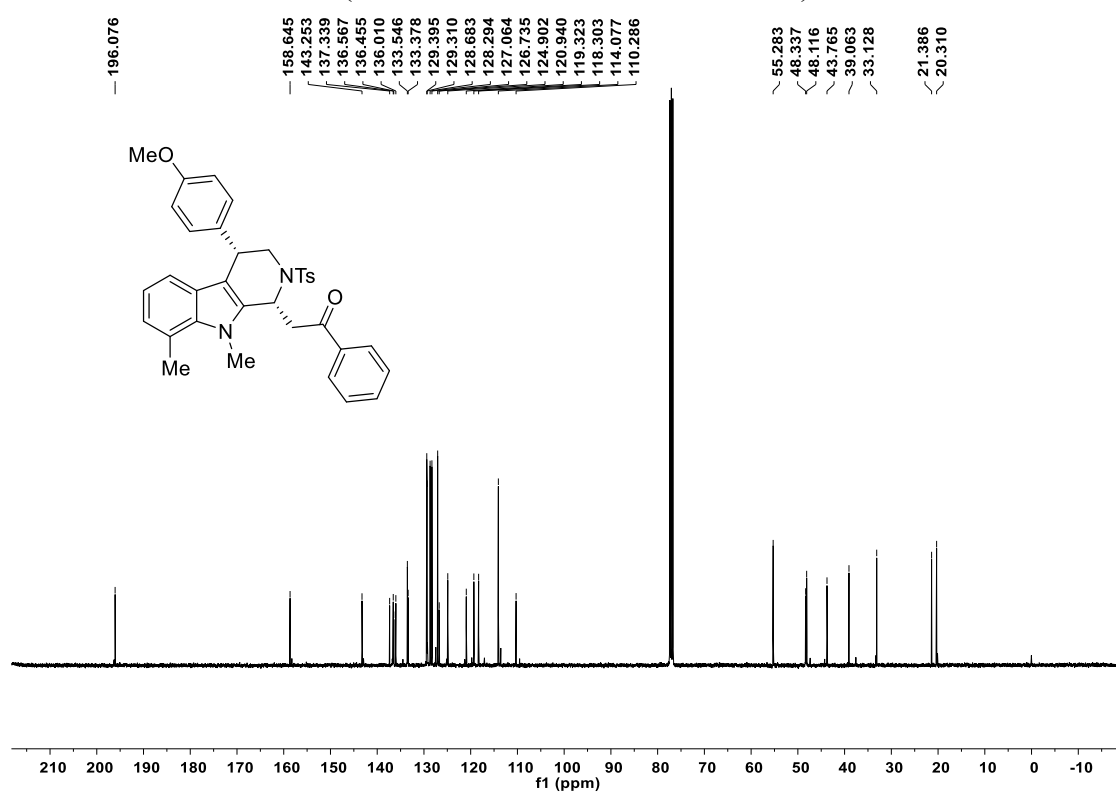

$^1\text{H}$  NMR of **3s** in  $\text{CDCl}_3$  (a mixture of diastereomers, 5:1 dr)

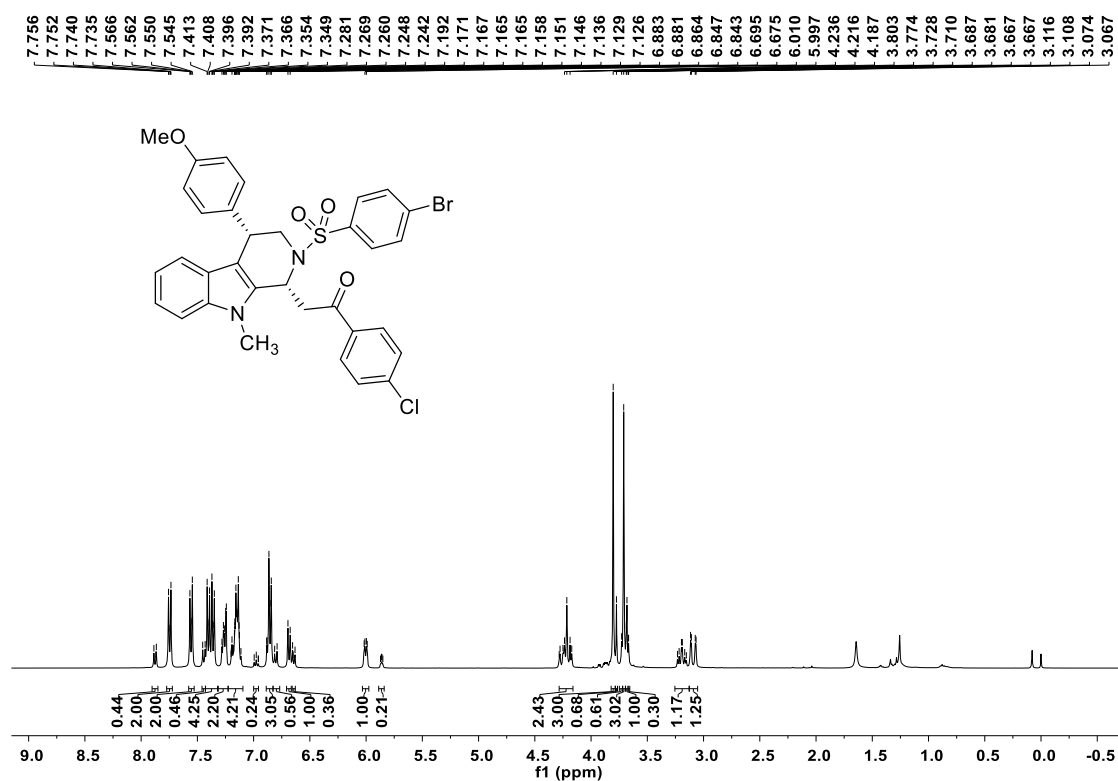

$^{13}\text{C}$  NMR of **3s** in  $\text{CDCl}_3$  (a mixture of diastereomers, 5:1 dr)

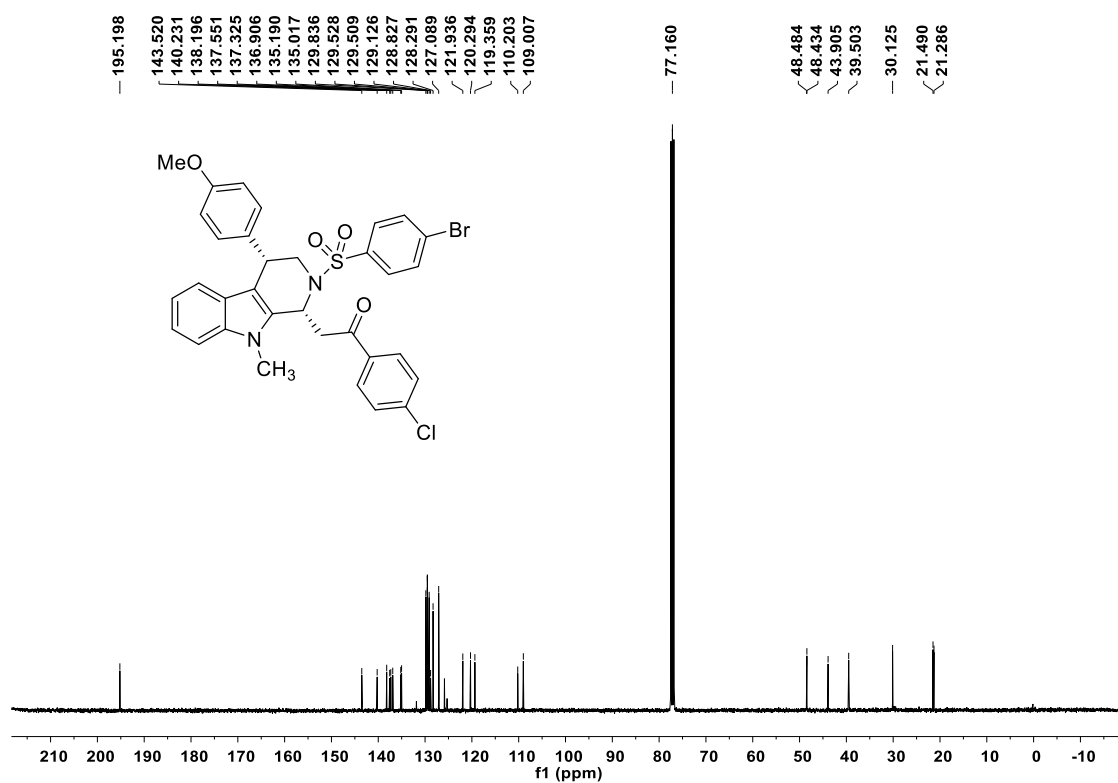

<sup>1</sup>H NMR of **3t** in CDCl<sub>3</sub>

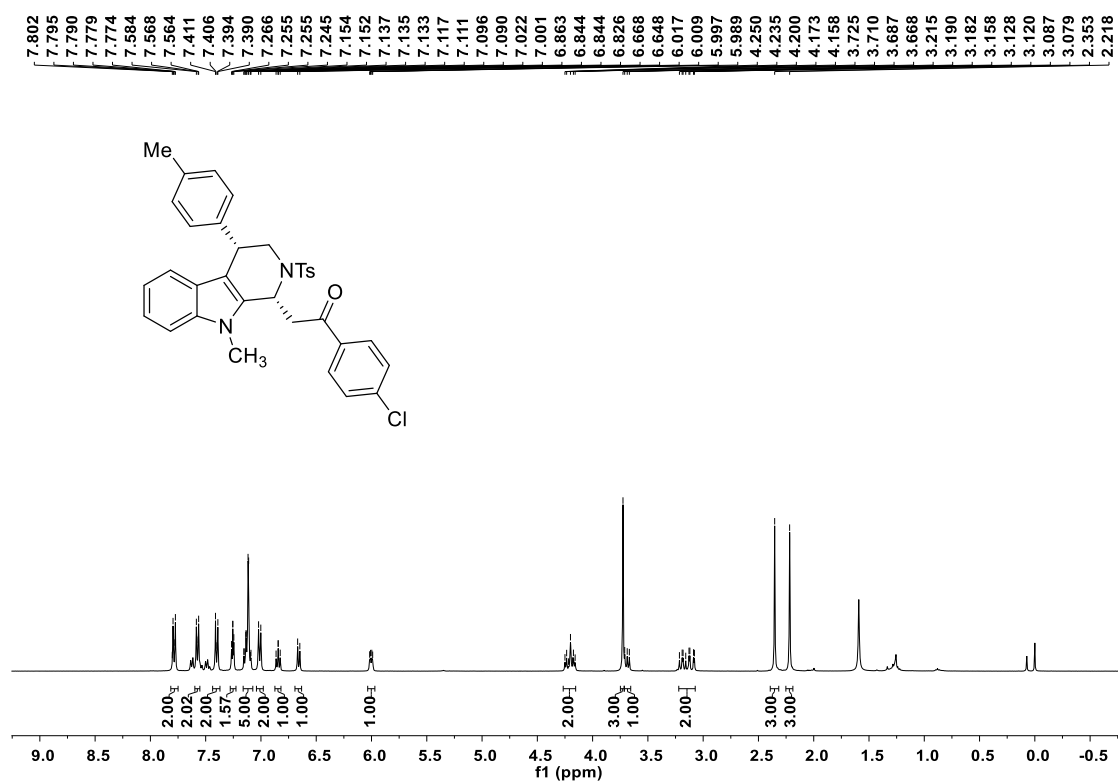

<sup>13</sup>C NMR of **3t** in CDCl<sub>3</sub>

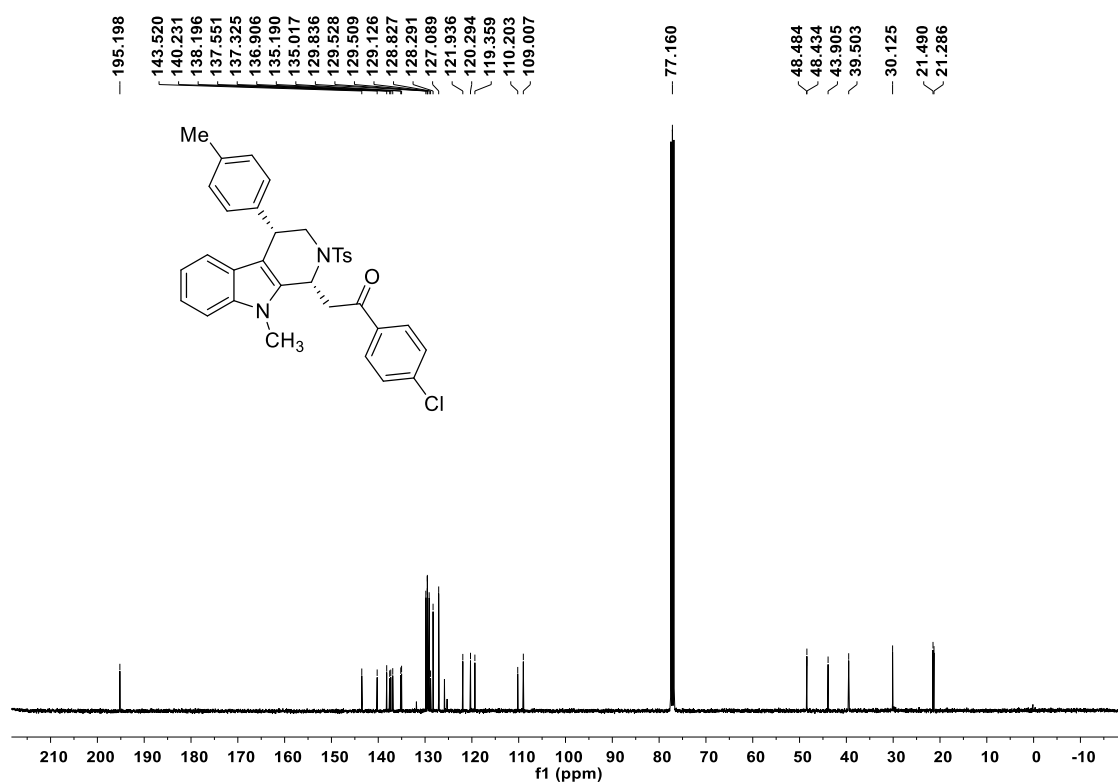

$^1\text{H}$  NMR of **3u** in  $\text{CDCl}_3$  (a mixture of diastereomers, 12:1 dr)

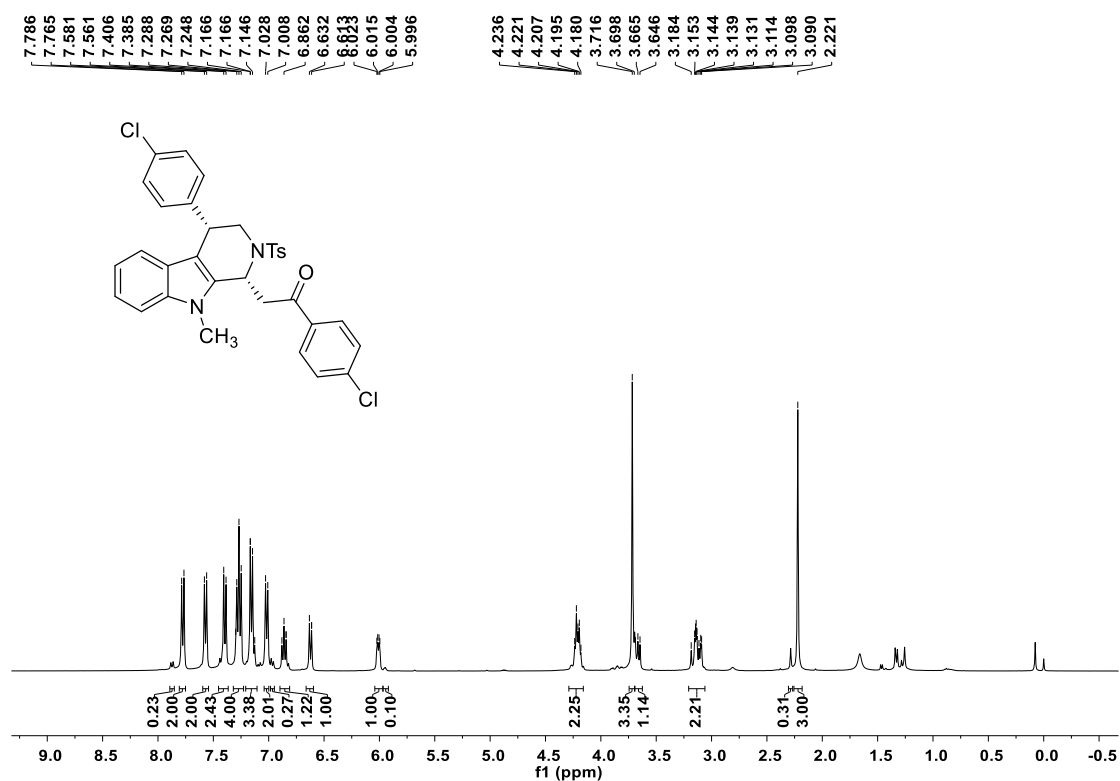

$^{13}\text{C}$  NMR of **3u** in  $\text{CDCl}_3$  (a mixture of diastereomers, 12:1 dr)

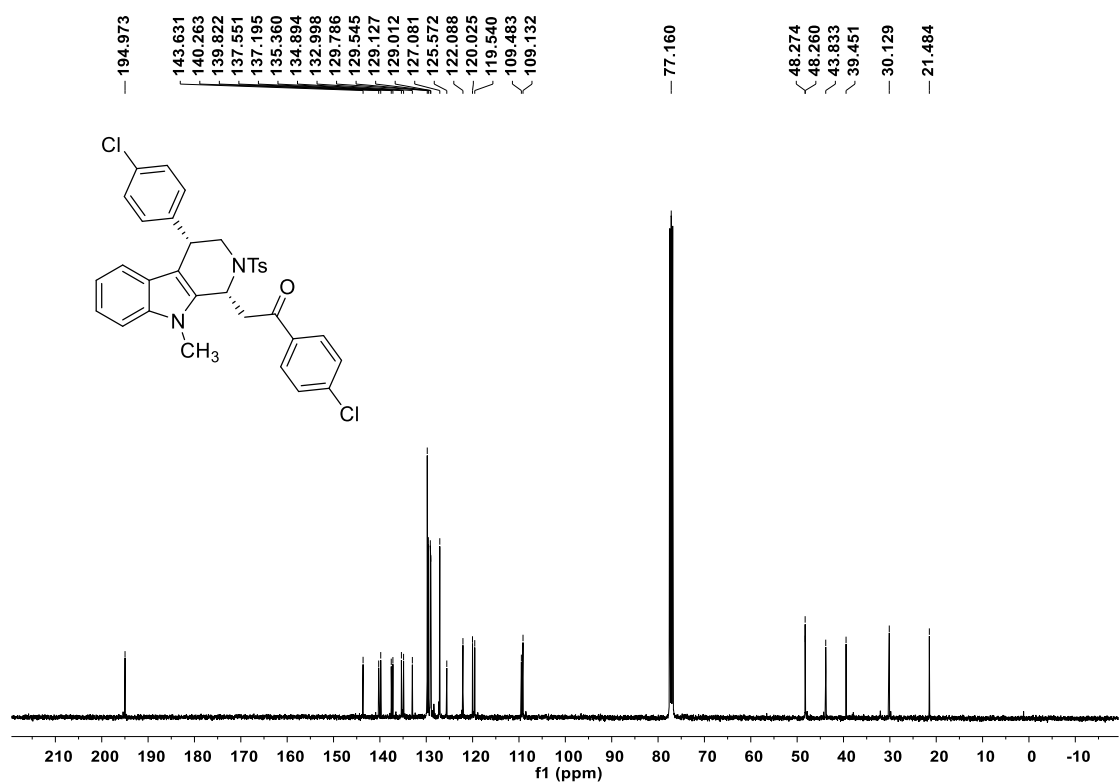

<sup>1</sup>H NMR of **3v** in CDCl<sub>3</sub> (a mixture of diastereomers, 20:1 dr)

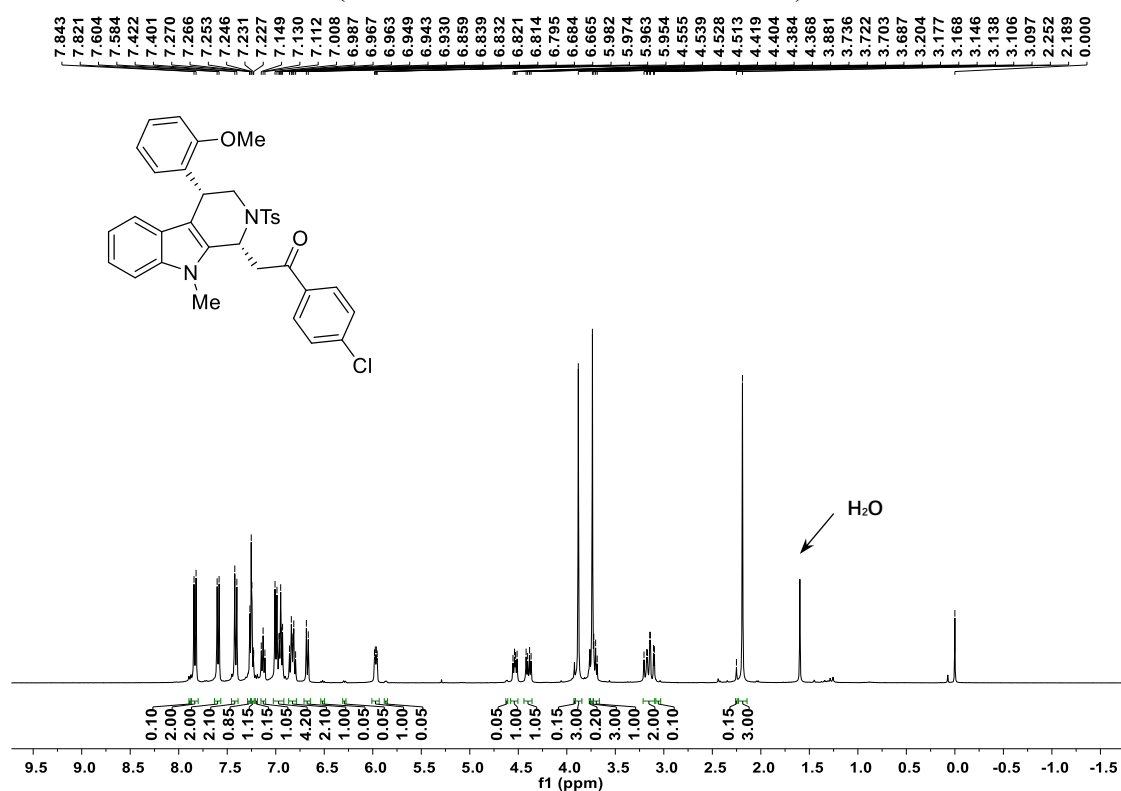

<sup>13</sup>C NMR of **3v** in CDCl<sub>3</sub> (a mixture of diastereomers, 20:1 dr)

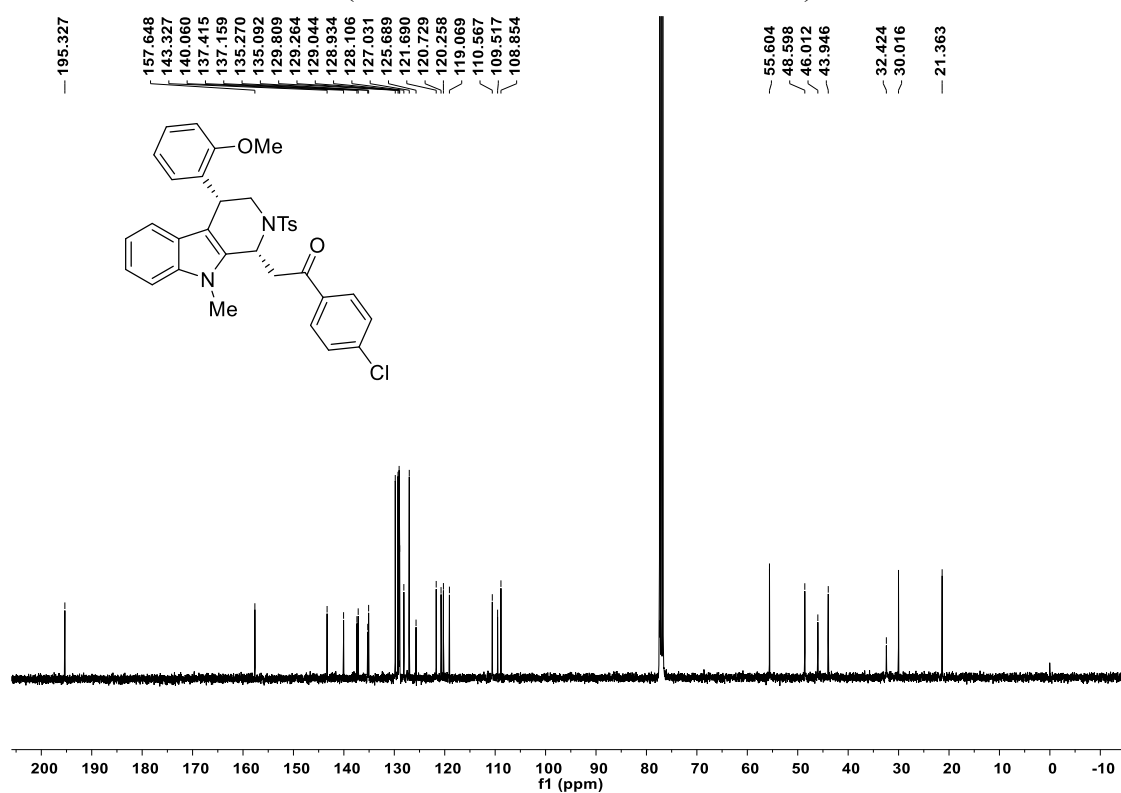

$^1\text{H}$  NMR of **3w** in  $\text{CDCl}_3$  (a mixture of diastereomers, 10:1 dr)

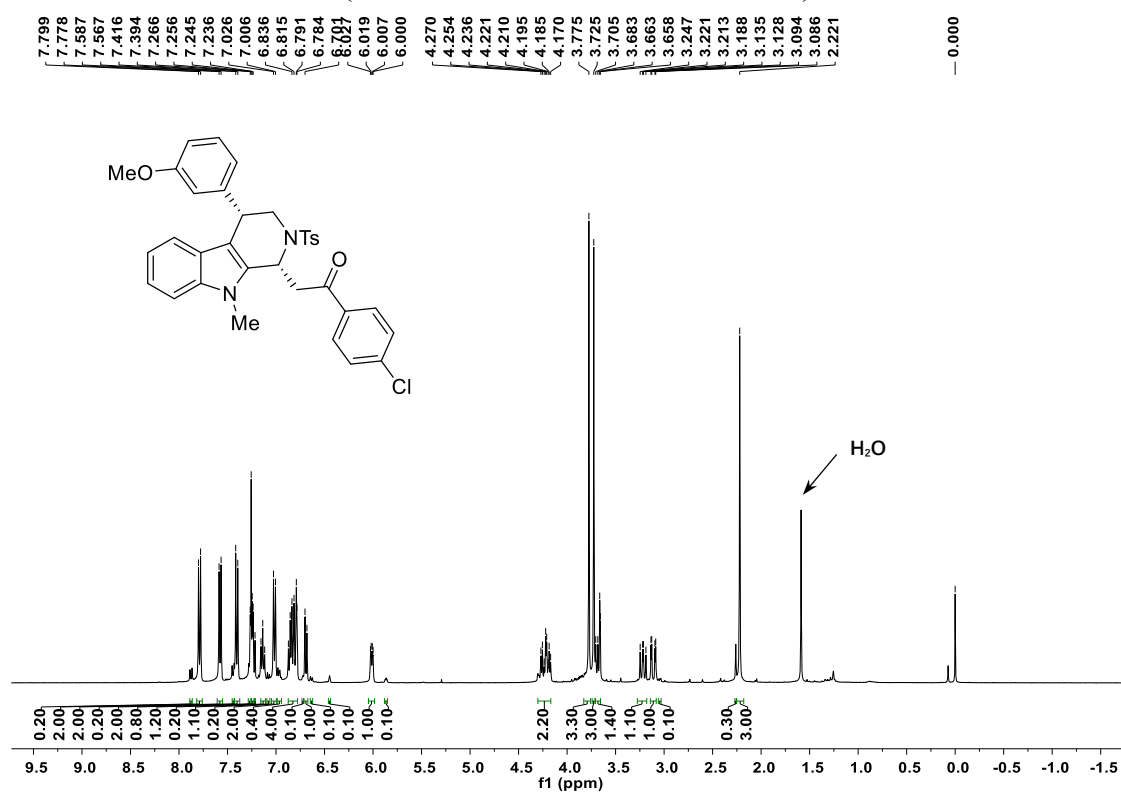

$^{13}\text{C}$  NMR of **3w** in  $\text{CDCl}_3$  (a mixture of diastereomers, 10:1 dr)

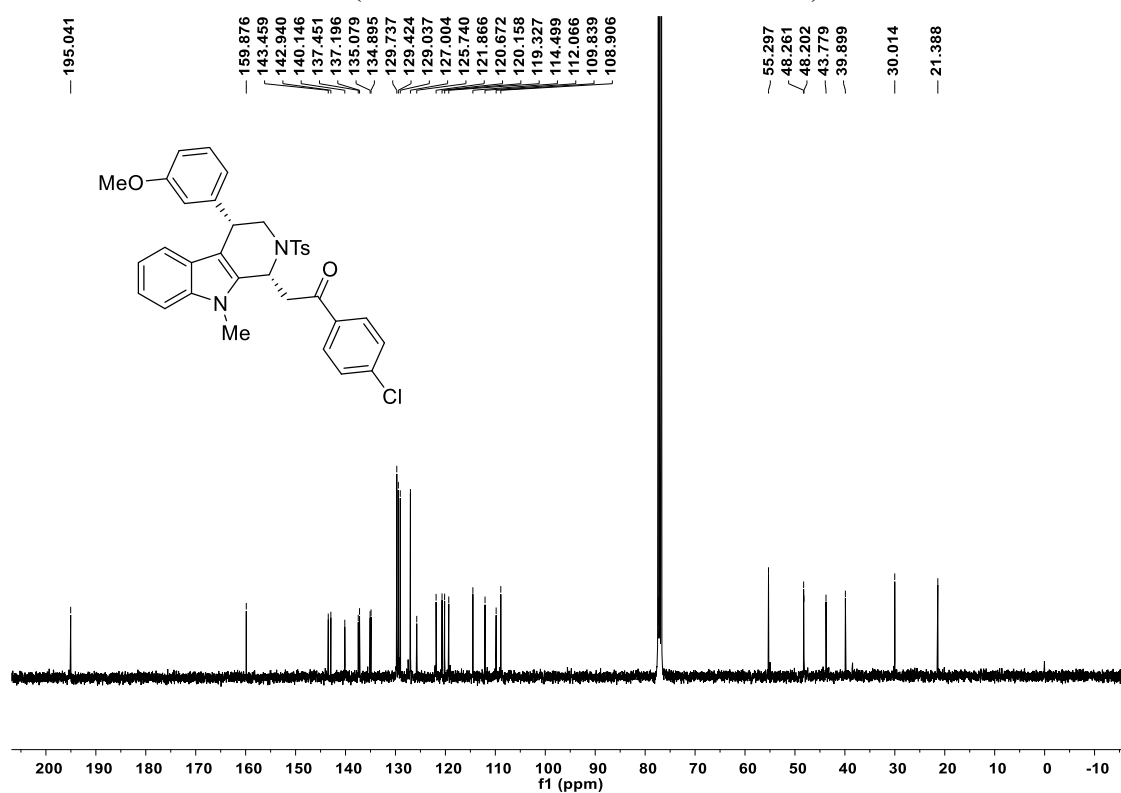

## 6. HPLC chromatograms

HPLC chromatogram of compound **3a** (94% ee)

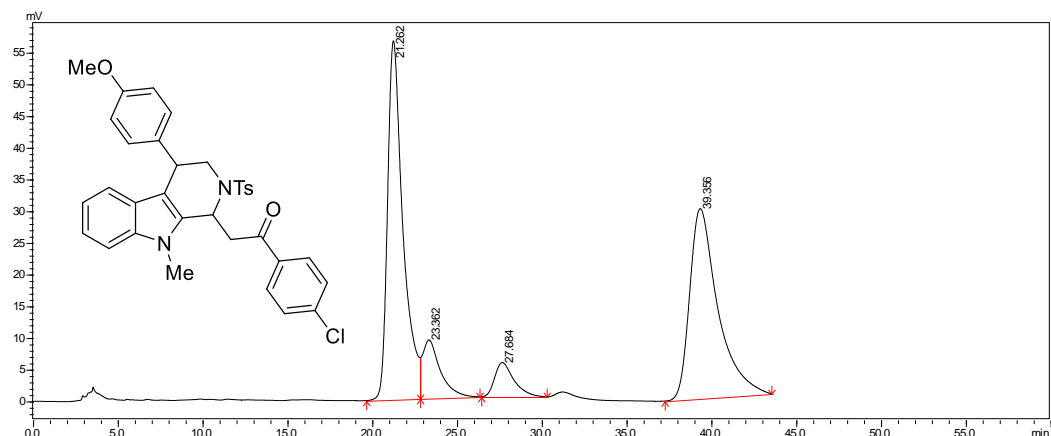

|   | Ret Time (min) | Height ( $\mu$ V) | Area ( $\mu$ V.sec) | Area (%) |
|---|----------------|-------------------|---------------------|----------|
| 1 | 21.262         | 56589             | 3572754             | 43.845   |
| 2 | 23.362         | 9229              | 686093              | 8.420    |
| 3 | 27.684         | 5401              | 424928              | 5.215    |
| 4 | 39.356         | 29961             | 3464855             | 42.521   |

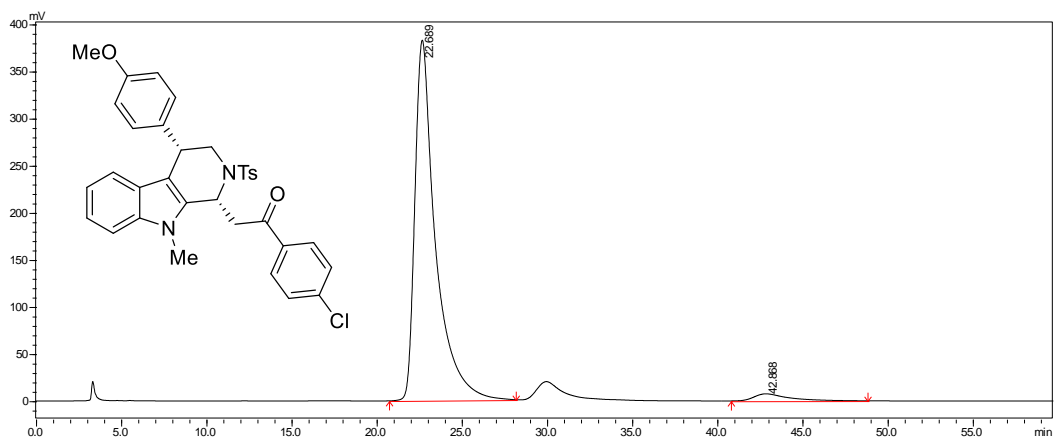

|   | Ret Time (min) | Height ( $\mu$ V) | Area ( $\mu$ V.sec) | Area (%) |
|---|----------------|-------------------|---------------------|----------|
| 1 | 22.689         | 382602            | 32072955            | 96.808   |
| 2 | 42.868         | 7523              | 1057681             | 3.192    |



HPLC chromatogram of compound **3b** (91% ee)

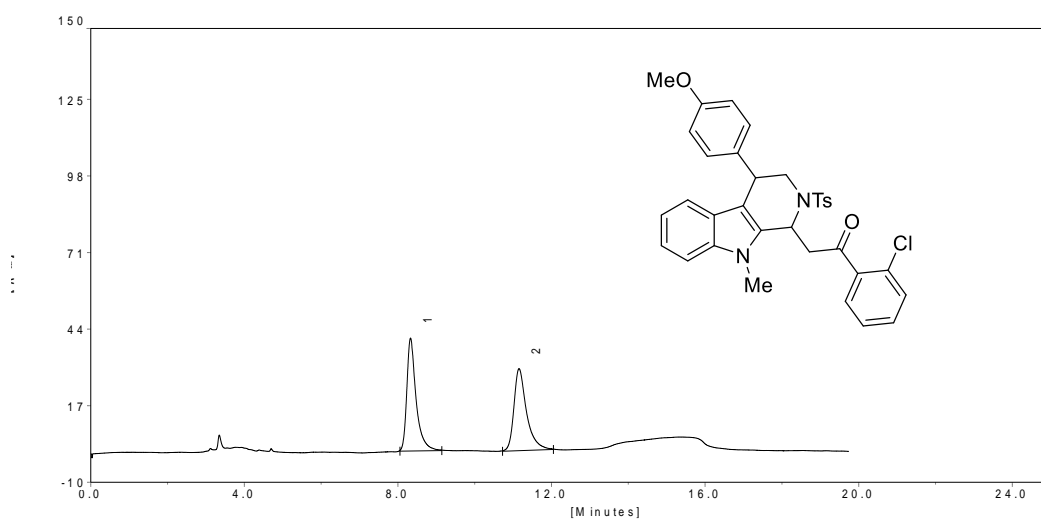

|   | Ret Time (min) | Height ( $\mu\text{V}$ ) | Area ( $\mu\text{V}\cdot\text{sec}$ ) | Area (%) |
|---|----------------|--------------------------|---------------------------------------|----------|
| 1 | 8.32833        | 39.68                    | 658.64                                | 50.4002  |
| 2 | 11.15500       | 28.79                    | 648.18                                | 49.5998  |

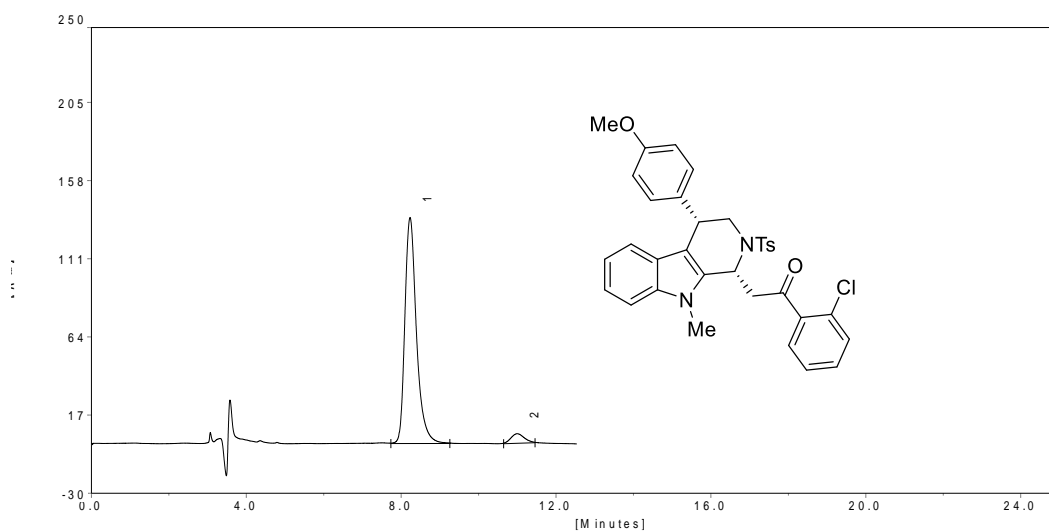

|   | Ret Time (min) | Height ( $\mu\text{V}$ ) | Area ( $\mu\text{V}\cdot\text{sec}$ ) | Area (%) |
|---|----------------|--------------------------|---------------------------------------|----------|
| 1 | 8.23083        | 135.66                   | 2797.19                               | 95.7101  |
| 2 | 10.99667       | 5.49                     | 125.38                                | 4.2899   |

HPLC chromatogram of compound **3c** (94% ee)

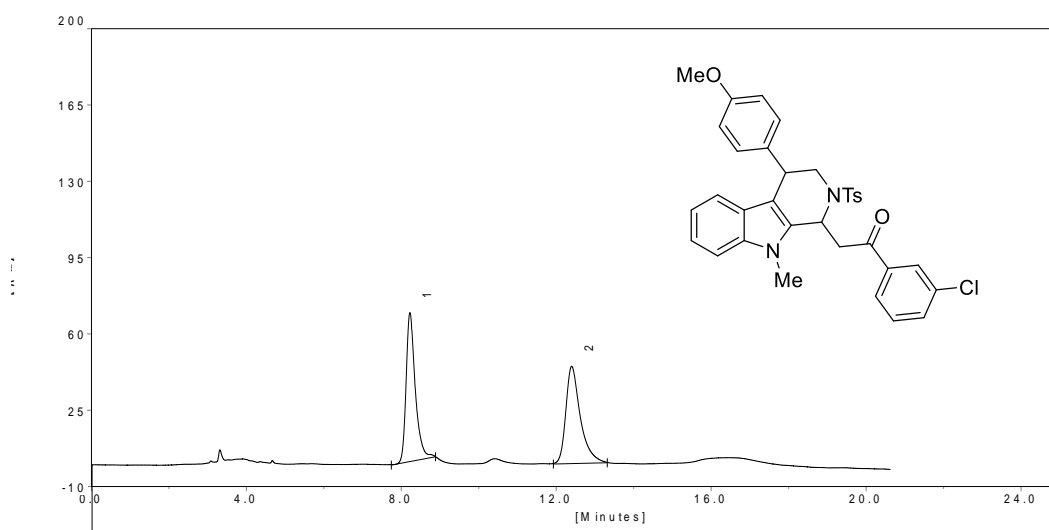

|   | Ret Time (min) | Height ( $\mu\text{V}$ ) | Area ( $\mu\text{V}\cdot\text{sec}$ ) | Area (%) |
|---|----------------|--------------------------|---------------------------------------|----------|
| 1 | 8.22167        | 68.12                    | 1106.63                               | 49.2063  |
| 2 | 12.39750       | 44.42                    | 1142.33                               | 50.7937  |

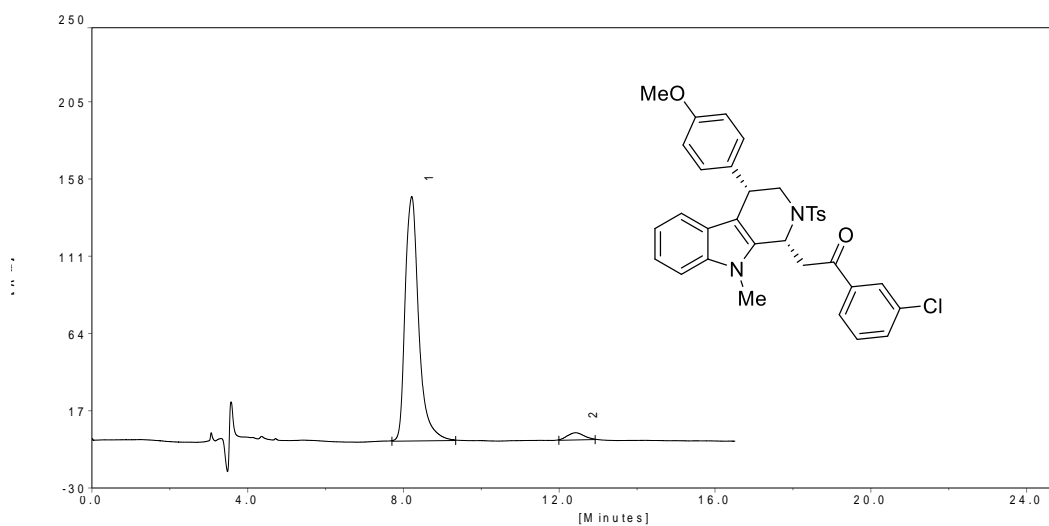

|   | Ret Time (min) | Height ( $\mu\text{V}$ ) | Area ( $\mu\text{V}\cdot\text{sec}$ ) | Area (%) |
|---|----------------|--------------------------|---------------------------------------|----------|
| 1 | 8.21500        | 148.50                   | 3582.91                               | 96.8629  |
| 2 | 12.42667       | 4.1                      | 116.04                                | 3.1371   |

HPLC chromatogram of compound **3d** (94% ee)

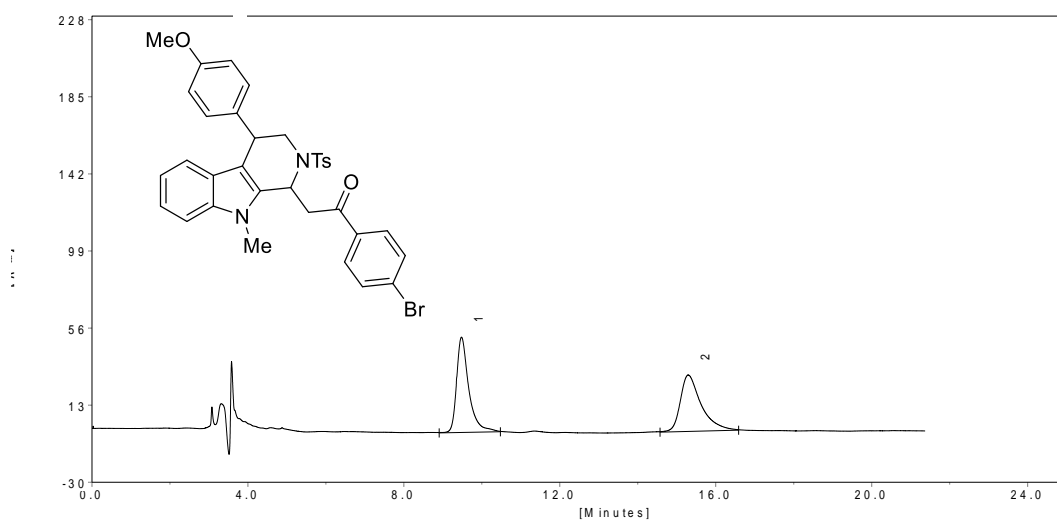

|   | Ret Time (min) | Height ( $\mu\text{V}$ ) | Area ( $\mu\text{V}\cdot\text{sec}$ ) | Area (%) |
|---|----------------|--------------------------|---------------------------------------|----------|
| 1 | 9.47750        | 52.96                    | 1136.40                               | 50.0876  |
| 2 | 15.29000       | 31.22                    | 1132.42                               | 49.9124  |

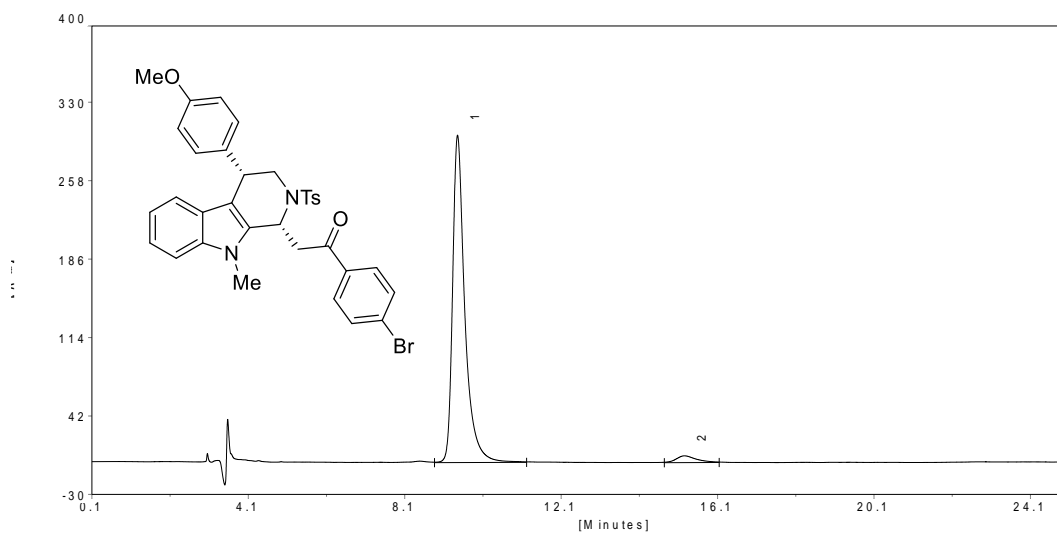

|   | Ret Time (min) | Height ( $\mu\text{V}$ ) | Area ( $\mu\text{V}\cdot\text{sec}$ ) | Area (%) |
|---|----------------|--------------------------|---------------------------------------|----------|
| 1 | 9.45250        | 300.14                   | 6490.53                               | 97.1084  |
| 2 | 15.25167       | 5.83                     | 193.27                                | 2.8916   |

HPLC chromatogram of compound **3e** (95% ee)

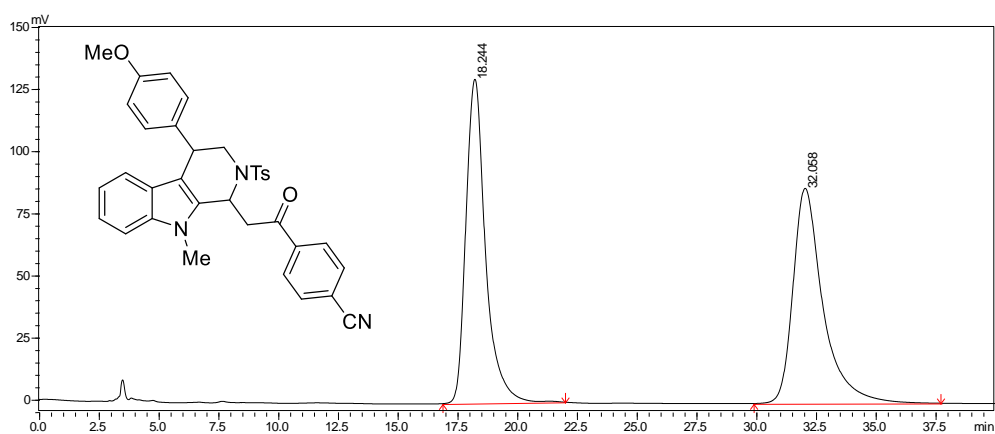

|   | Ret Time (min) | Height (μV) | Area (μV.sec) | Area (%) |
|---|----------------|-------------|---------------|----------|
| 1 | 18.244         | 130332      | 7434994       | 49.671   |
| 2 | 32.058         | 86542       | 7533450       | 50.329   |

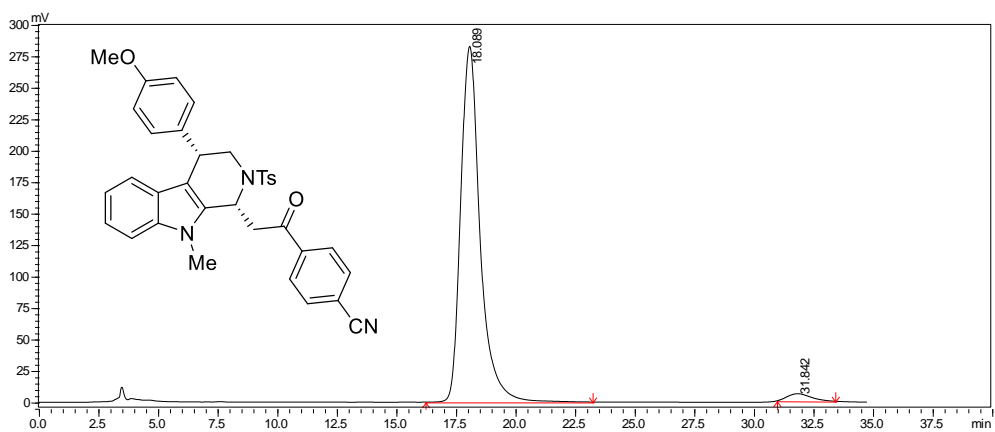

|   | Ret Time (min) | Height (μV) | Area (μV.sec) | Area (%) |
|---|----------------|-------------|---------------|----------|
| 1 | 18.089         | 282680      | 16017871      | 97.583   |
| 2 | 31.842         | 5808        | 396730        | 2.417    |

HPLC chromatogram of compound **3f** (93% ee)

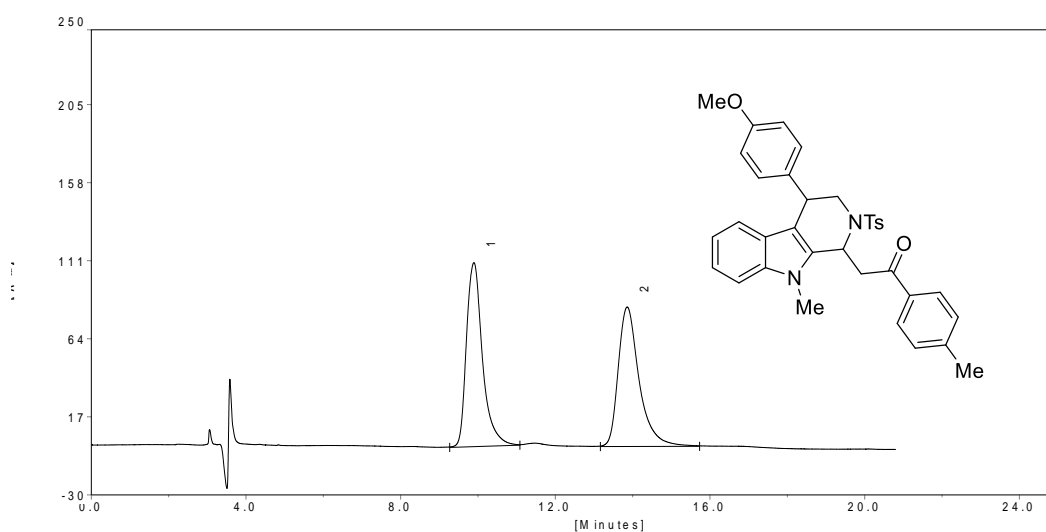

|   | Ret Time (min) | Height ( $\mu\text{V}$ ) | Area ( $\mu\text{V}\cdot\text{sec}$ ) | Area (%) |
|---|----------------|--------------------------|---------------------------------------|----------|
| 1 | 9.89500        | 110.51                   | 3159.43                               | 50.3766  |
| 2 | 13.86000       | 83.76                    | 3112.20                               | 49.6234  |

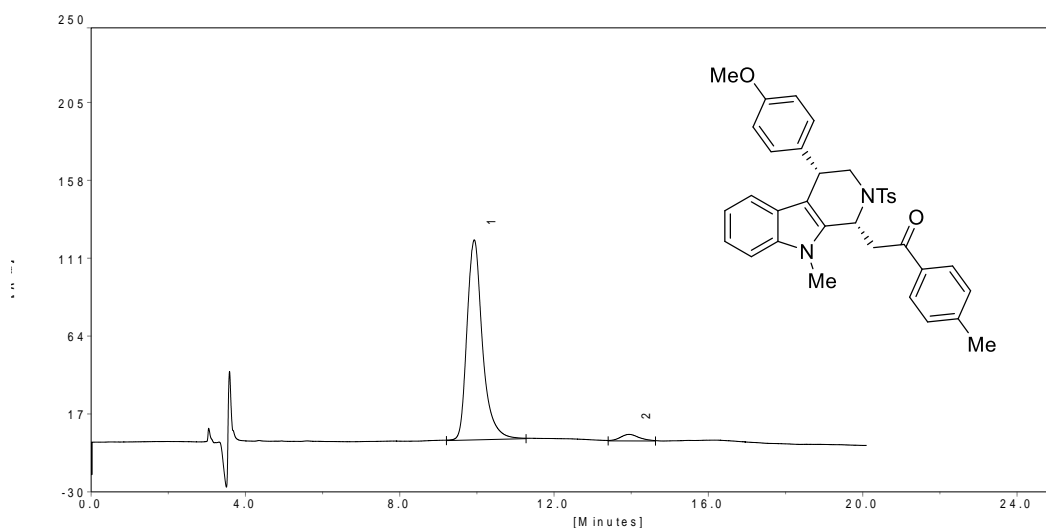

|   | Ret Time (min) | Height ( $\mu\text{V}$ ) | Area ( $\mu\text{V}\cdot\text{sec}$ ) | Area (%) |
|---|----------------|--------------------------|---------------------------------------|----------|
| 1 | 9.93250        | 120.50                   | 3332.84                               | 96.6480  |
| 2 | 13.93750       | 3.69                     | 115.59                                | 3.3520   |

HPLC chromatogram of compound **3g** (92% ee)

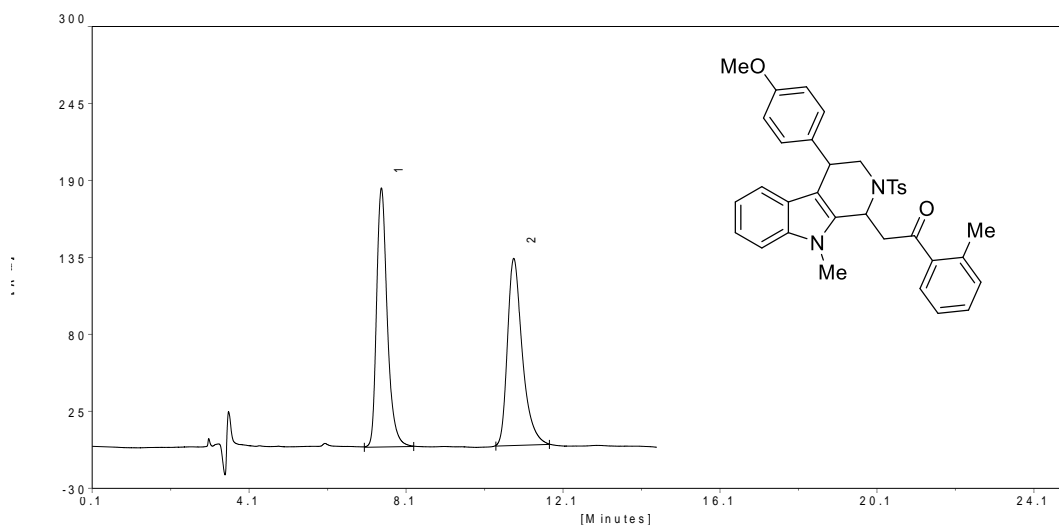

|   | Ret Time (min) | Height ( $\mu\text{V}$ ) | Area ( $\mu\text{V}\cdot\text{sec}$ ) | Area (%) |
|---|----------------|--------------------------|---------------------------------------|----------|
| 1 | 7.47167        | 184.83                   | 3480.32                               | 49.9441  |
| 2 | 10.84667       | 133.45                   | 3488.11                               | 50.0559  |

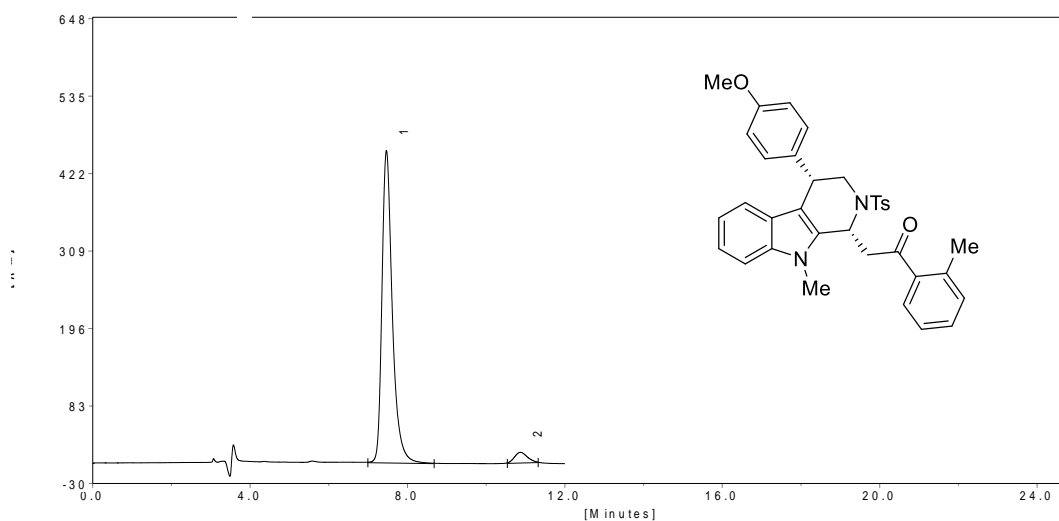

|   | Ret Time (min) | Height ( $\mu\text{V}$ ) | Area ( $\mu\text{V}\cdot\text{sec}$ ) | Area (%) |
|---|----------------|--------------------------|---------------------------------------|----------|
| 1 | 7.46500        | 455.20                   | 8297.99                               | 96.1813  |
| 2 | 10.86500       | 15.01                    | 329.46                                | 3.8187   |

HPLC chromatogram of compound **3h** (91% ee)

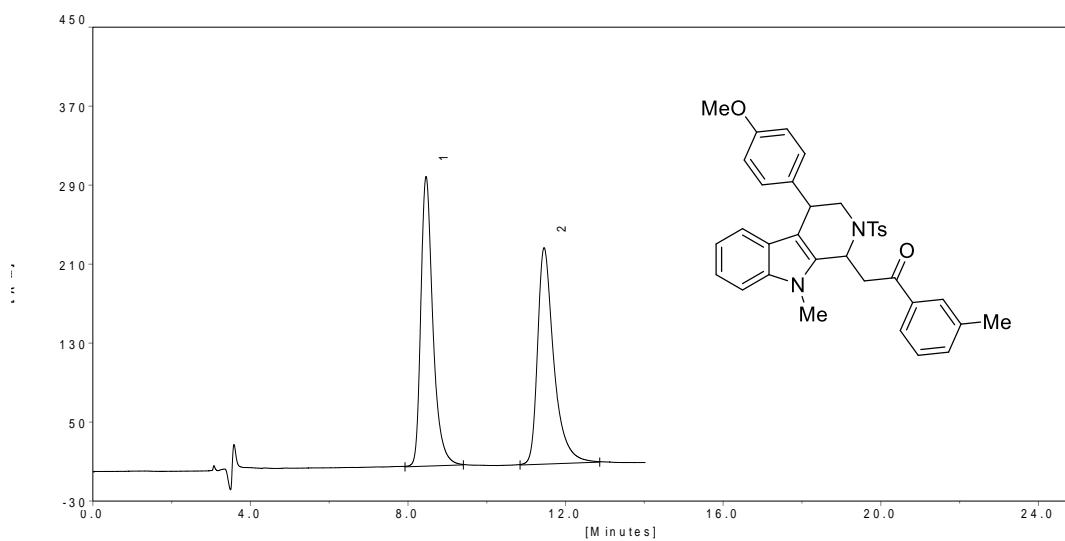

|   | Ret Time (min) | Height ( $\mu\text{V}$ ) | Area ( $\mu\text{V}\cdot\text{sec}$ ) | Area (%) |
|---|----------------|--------------------------|---------------------------------------|----------|
| 1 | 8.45833        | 293.00                   | 6201.94                               | 49.8837  |
| 2 | 11.45417       | 218.85                   | 6230.85                               | 50.1163  |

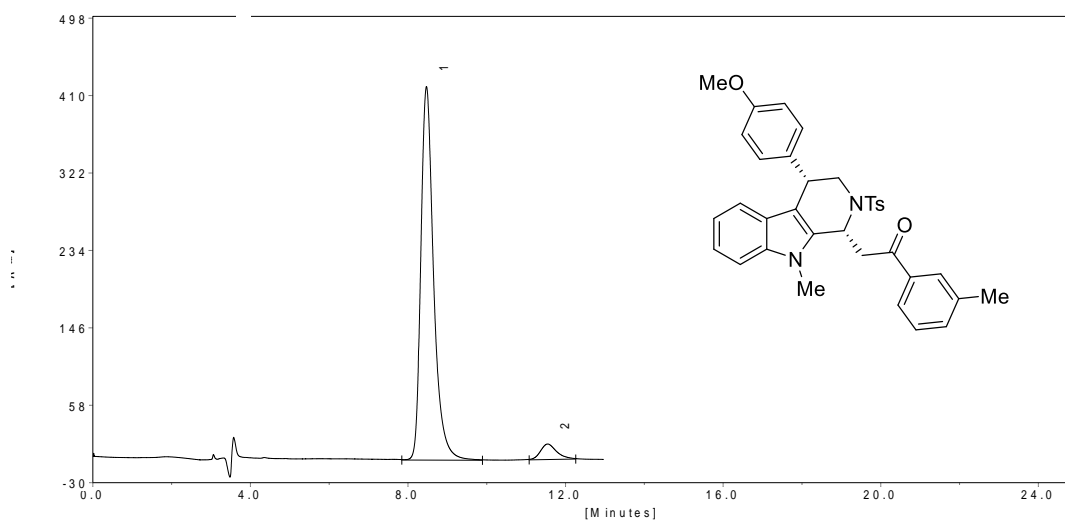

|   | Ret Time (min) | Height ( $\mu\text{V}$ ) | Area ( $\mu\text{V}\cdot\text{sec}$ ) | Area (%) |
|---|----------------|--------------------------|---------------------------------------|----------|
| 1 | 8.46833        | 424.07                   | 9505.45                               | 95.2914  |
| 2 | 11.54083       | 17.13                    | 469.69                                | 4.7086   |

HPLC chromatogram of compound **3i** (94% ee)

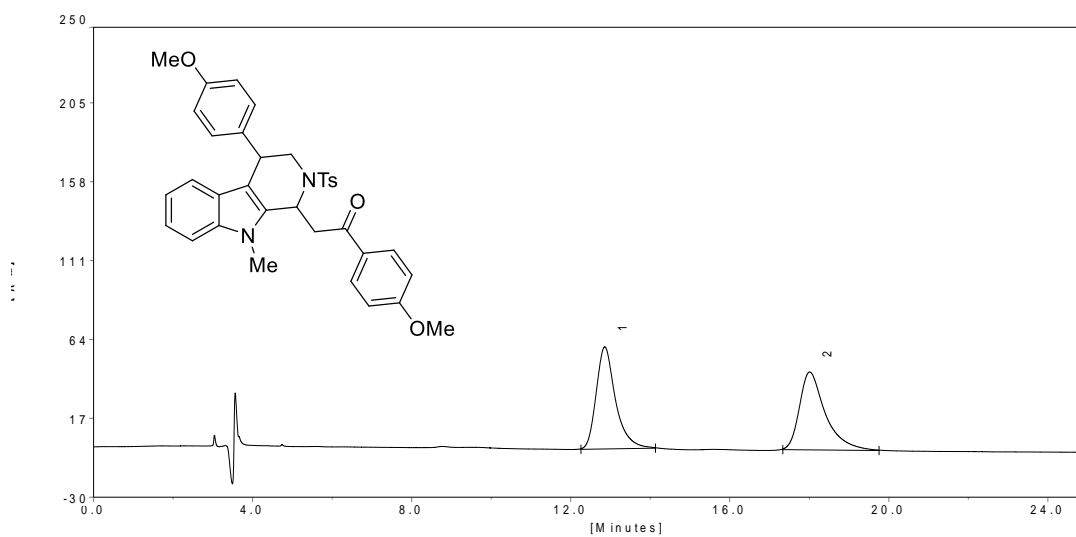

|   | Ret Time (min) | Height ( $\mu\text{V}$ ) | Area ( $\mu\text{V}\cdot\text{sec}$ ) | Area (%) |
|---|----------------|--------------------------|---------------------------------------|----------|
| 1 | 12.85917       | 60.62                    | 2024.33                               | 49.5881  |
| 2 | 18.00833       | 46.16                    | 2057.96                               | 50.4119  |

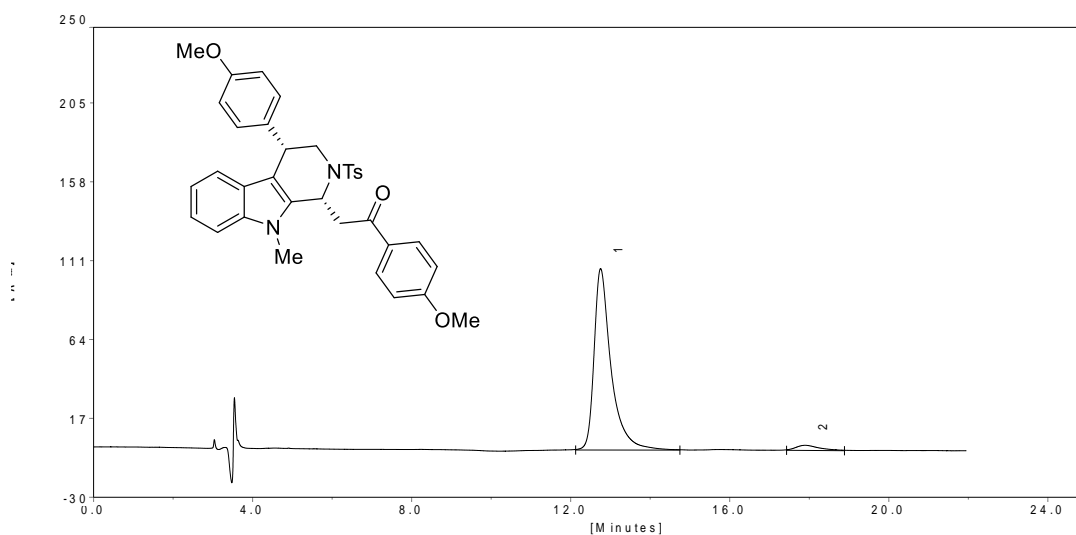

|   | Ret Time (min) | Height ( $\mu\text{V}$ ) | Area ( $\mu\text{V}\cdot\text{sec}$ ) | Area (%) |
|---|----------------|--------------------------|---------------------------------------|----------|
| 1 | 12.75167       | 107.89                   | 3178.17                               | 96.8045  |
| 2 | 17.90167       | 2.80                     | 104.91                                | 3.1955   |



HPLC chromatogram of compound **3j** (93% ee)

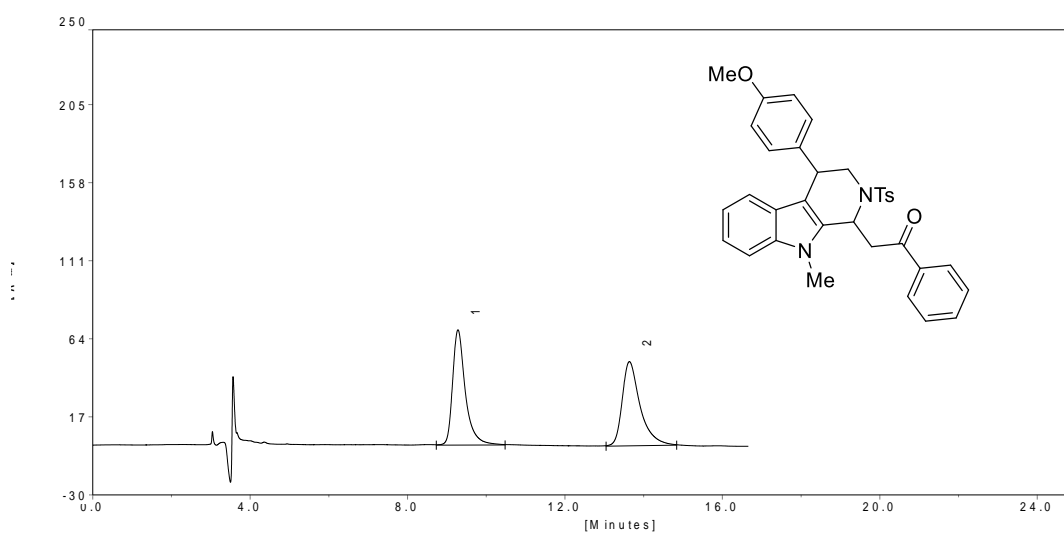

|   | Ret Time (min) | Height ( $\mu\text{V}$ ) | Area ( $\mu\text{V}\cdot\text{sec}$ ) | Area (%) |
|---|----------------|--------------------------|---------------------------------------|----------|
| 1 | 9.28167        | 69.14                    | 1538.36                               | 49.4357  |
| 2 | 13.63667       | 50.45                    | 1573.48                               | 50.5643  |

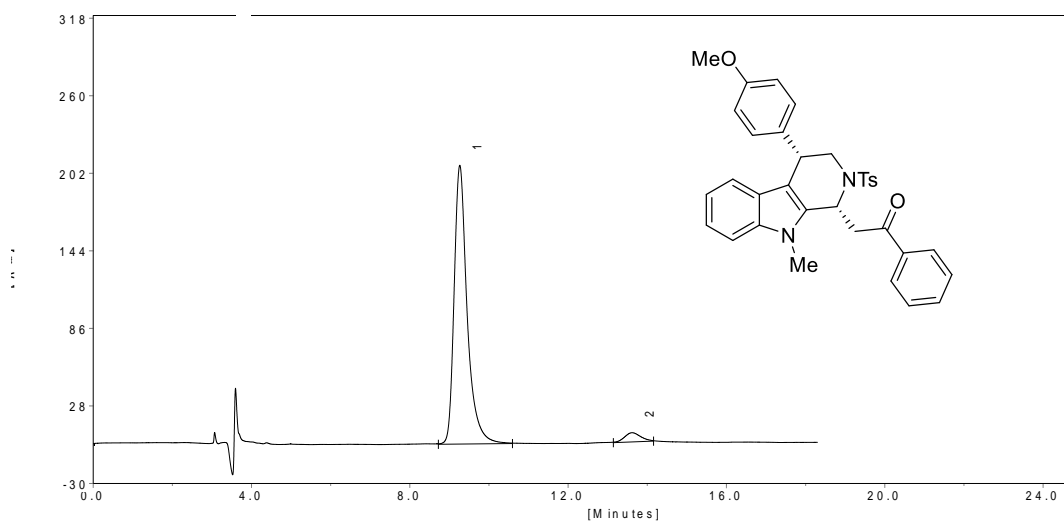

|   | Ret Time (min) | Height ( $\mu\text{V}$ ) | Area ( $\mu\text{V}\cdot\text{sec}$ ) | Area (%) |
|---|----------------|--------------------------|---------------------------------------|----------|
| 1 | 9.26333        | 208.21                   | 4730.25                               | 96.4141  |
| 2 | 13.61833       | 6.56                     | 175.93                                | 3.5859   |

HPLC chromatogram of compound **3k** (91% ee)

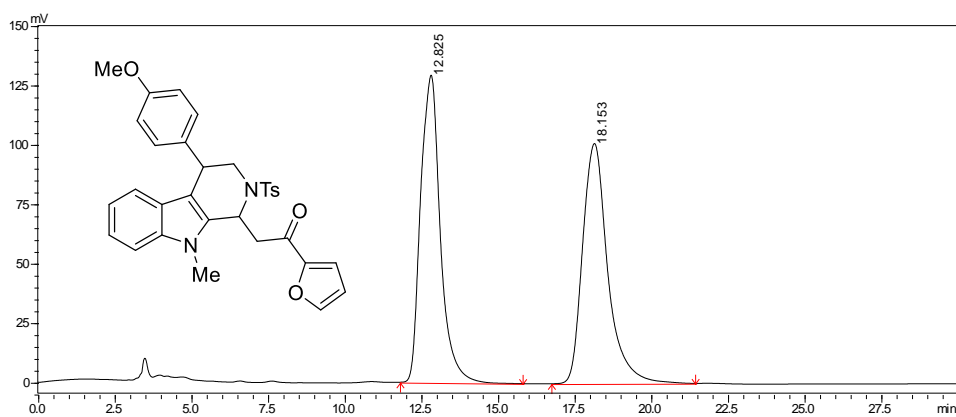

|   | Ret Time (min) | Height ( $\mu\text{V}$ ) | Area ( $\mu\text{V}\cdot\text{sec}$ ) | Area (%) |
|---|----------------|--------------------------|---------------------------------------|----------|
| 1 | 12.825         | 129308                   | 5772123                               | 50.010   |
| 2 | 18.153         | 101023                   | 5769740                               | 49.990   |

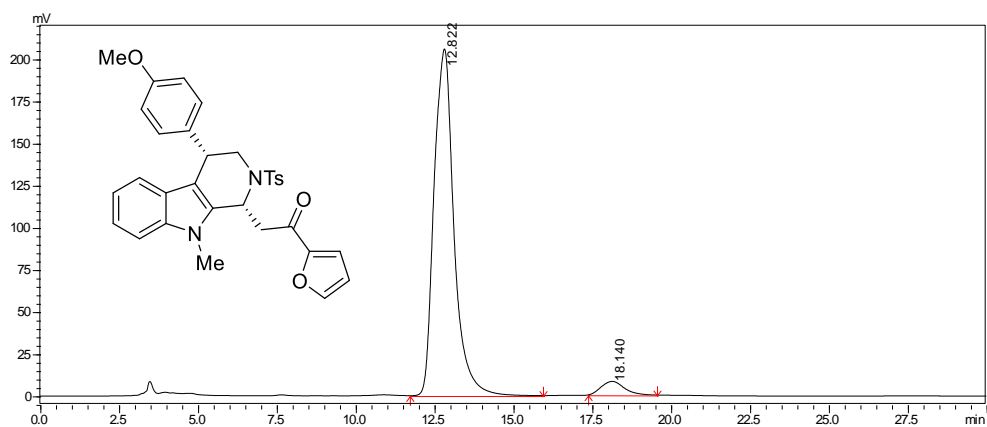

|   | Ret Time (min) | Height ( $\mu\text{V}$ ) | Area ( $\mu\text{V}\cdot\text{sec}$ ) | Area (%) |
|---|----------------|--------------------------|---------------------------------------|----------|
| 1 | 12.822         | 205734                   | 9017998                               | 95.648   |
| 2 | 18.140         | 8061                     | 410359                                | 4.352    |

HPLC chromatogram of compound **31** (92% ee)

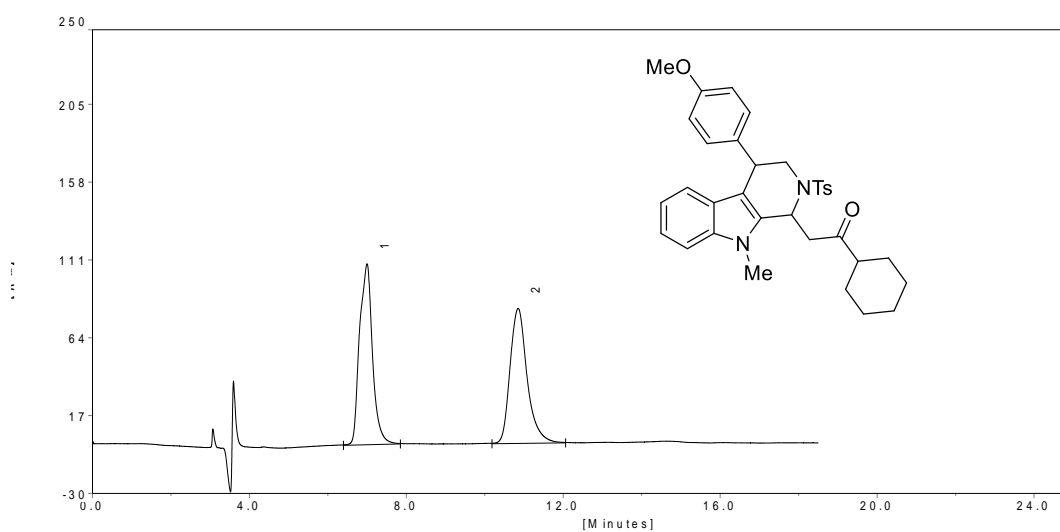

|   | Ret Time (min) | Height (μV) | Area (μV.sec) | Area (%) |
|---|----------------|-------------|---------------|----------|
| 1 | 6.99917        | 109.01      | 2479.51       | 50.4105  |
| 2 | 10.85167       | 81.31       | 2439.12       | 49.5895  |

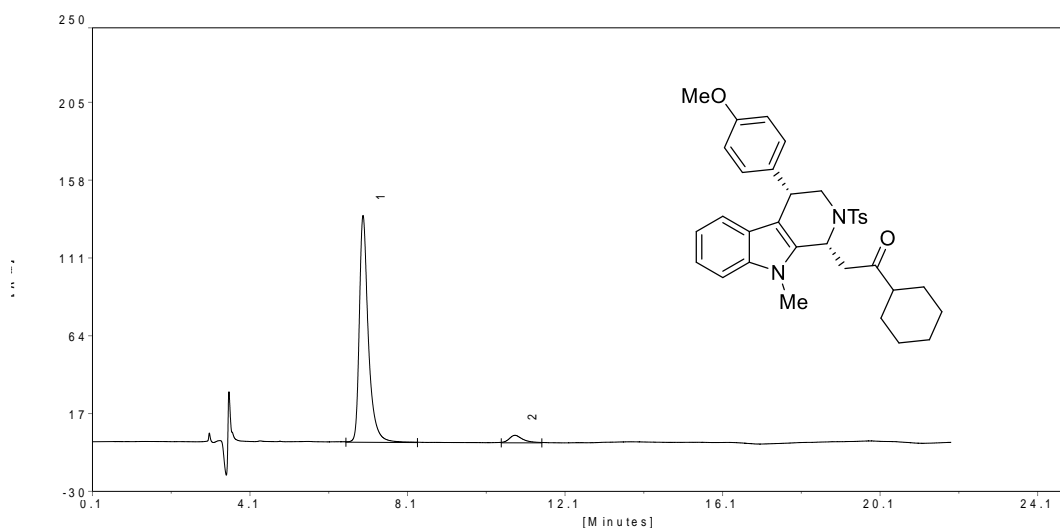

|   | Ret Time (min) | Height (μV) | Area (μV.sec) | Area (%) |
|---|----------------|-------------|---------------|----------|
| 1 | 6.97250        | 136.80      | 2153.41       | 95.7685  |
| 2 | 10.82583       | 4.30        | 95.15         | 4.2315   |

HPLC chromatogram of compound **3m** (89% ee)

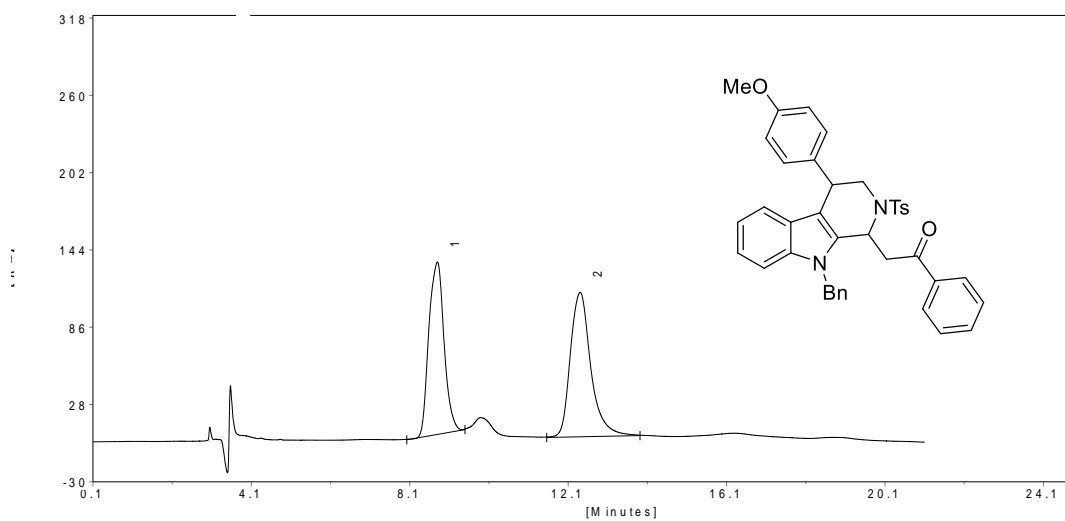

|   | Ret Time (min) | Height ( $\mu\text{V}$ ) | Area ( $\mu\text{V}\cdot\text{sec}$ ) | Area (%) |
|---|----------------|--------------------------|---------------------------------------|----------|
| 1 | 8.80000        | 129.05                   | 3414.62                               | 47.0523  |
| 2 | 12.40167       | 108.07                   | 3842.46                               | 52.9477  |

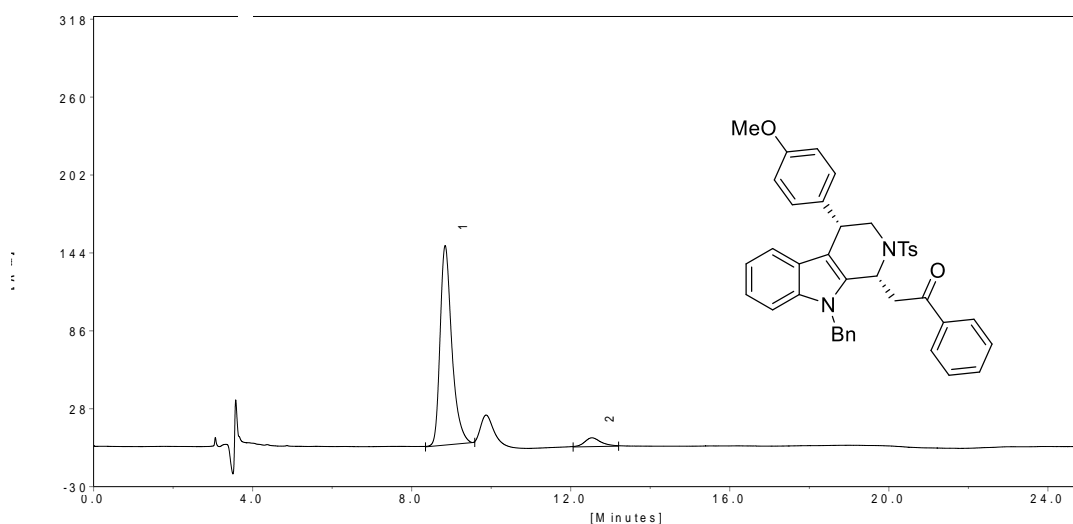

|   | Ret Time (min) | Height ( $\mu\text{V}$ ) | Area ( $\mu\text{V}\cdot\text{sec}$ ) | Area (%) |
|---|----------------|--------------------------|---------------------------------------|----------|
| 1 | 8.84167        | 148.21                   | 3011.36                               | 94.7043  |
| 2 | 12.53000       | 6.25                     | 168.39                                | 5.2957   |

HPLC chromatogram of compound **3n** (93% ee)

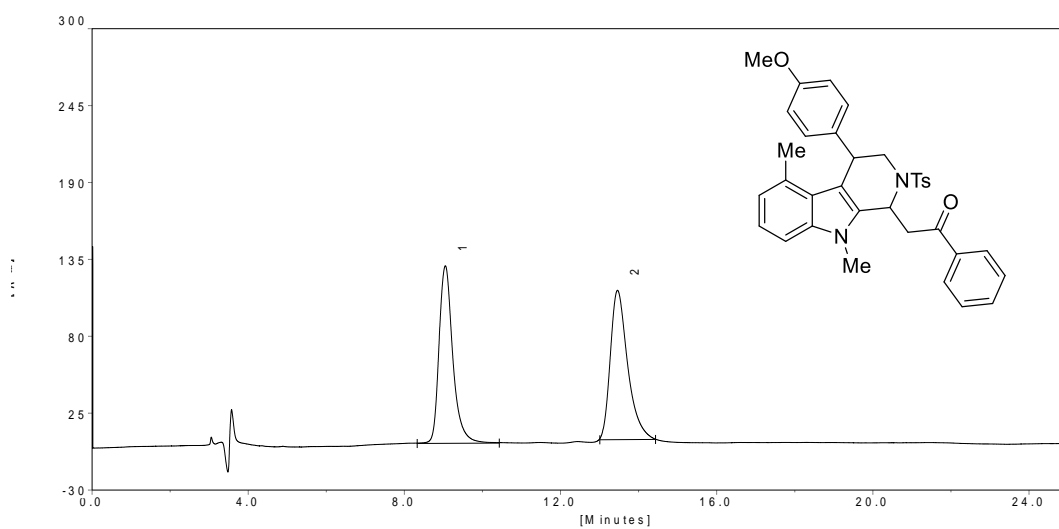

|   | Ret Time (min) | Height ( $\mu\text{V}$ ) | Area ( $\mu\text{V}\cdot\text{sec}$ ) | Area (%) |
|---|----------------|--------------------------|---------------------------------------|----------|
| 1 | 9.05000        | 126.73                   | 3080.35                               |          |
|   | 48.5193        |                          |                                       |          |
| 2 | 13.45917       | 106.55                   | 3268.36                               |          |
|   | 51.4807        |                          |                                       |          |

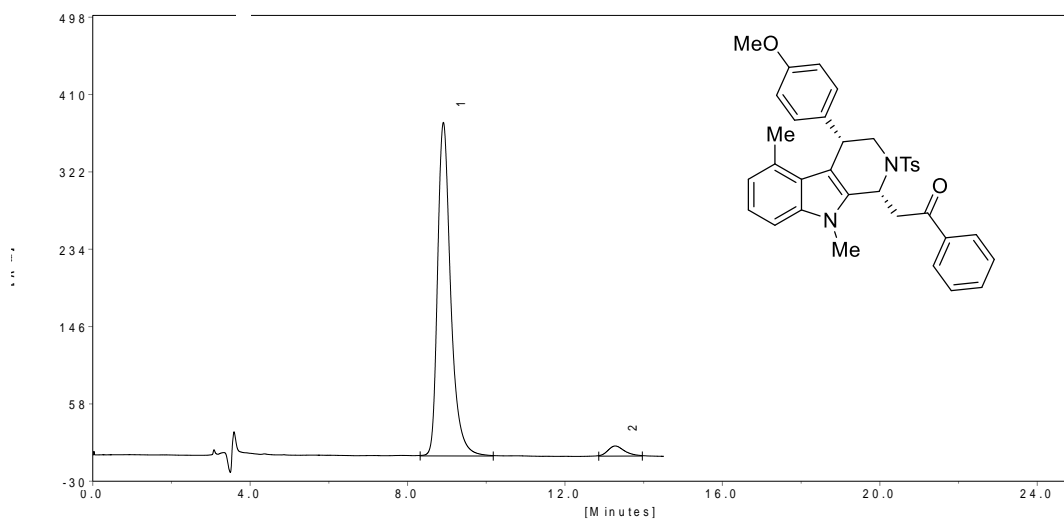

|   | Ret Time (min) | Height ( $\mu\text{V}$ ) | Area ( $\mu\text{V}\cdot\text{sec}$ ) | Area (%) |
|---|----------------|--------------------------|---------------------------------------|----------|
| 1 | 8.91083        | 379.09                   | 8725.42                               | 96.6102  |
| 2 | 13.27583       | 11.03                    | 306.16                                | 3.3898   |

HPLC chromatogram of compound **3o** (94% ee)

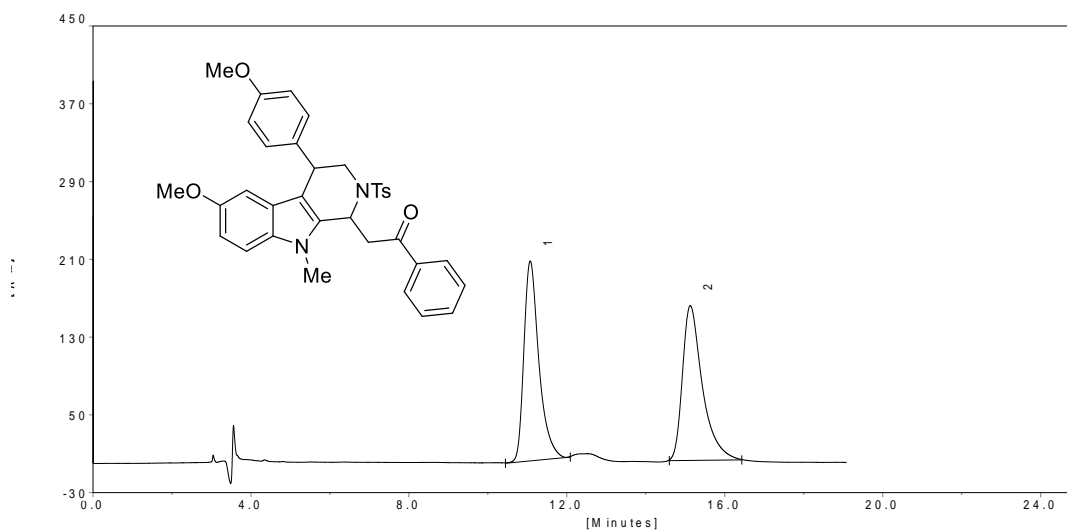

|   | Ret Time (min) | Height ( $\mu\text{V}$ ) | Area ( $\mu\text{V}\cdot\text{sec}$ ) | Area (%) |
|---|----------------|--------------------------|---------------------------------------|----------|
| 1 | 11.07333       | 205.22                   | 5380.43                               | 49.3030  |
| 2 | 15.12667       | 158.83                   | 5532.54                               | 50.6970  |

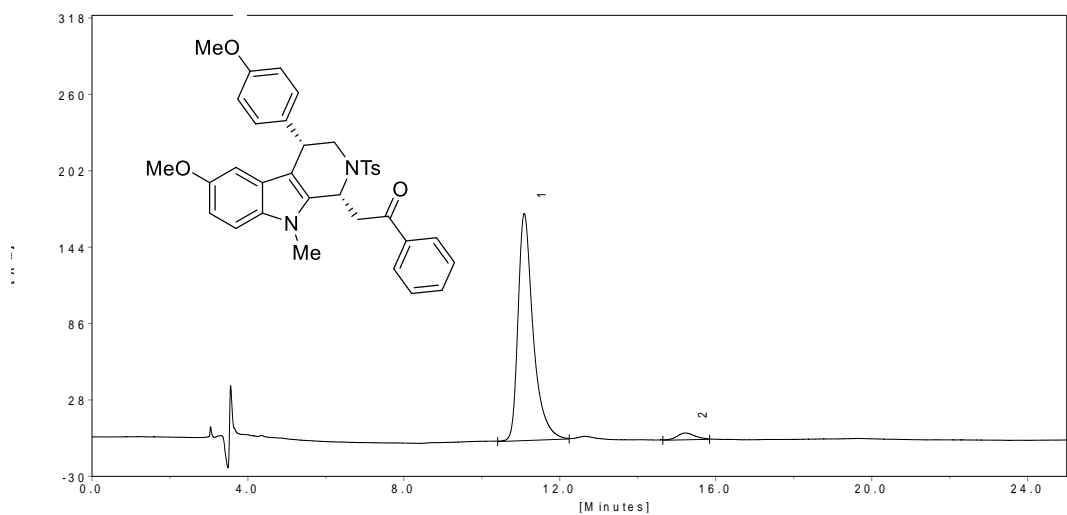

|   | Ret Time (min) | Height ( $\mu\text{V}$ ) | Area ( $\mu\text{V}\cdot\text{sec}$ ) | Area (%) |
|---|----------------|--------------------------|---------------------------------------|----------|
| 1 | 11.08917       | 172.22                   | 4602.48                               | 96.9515  |
| 2 | 15.22167       | 4.89                     | 144.72                                | 3.0485   |

HPLC chromatogram of compound **3p** (93% ee)

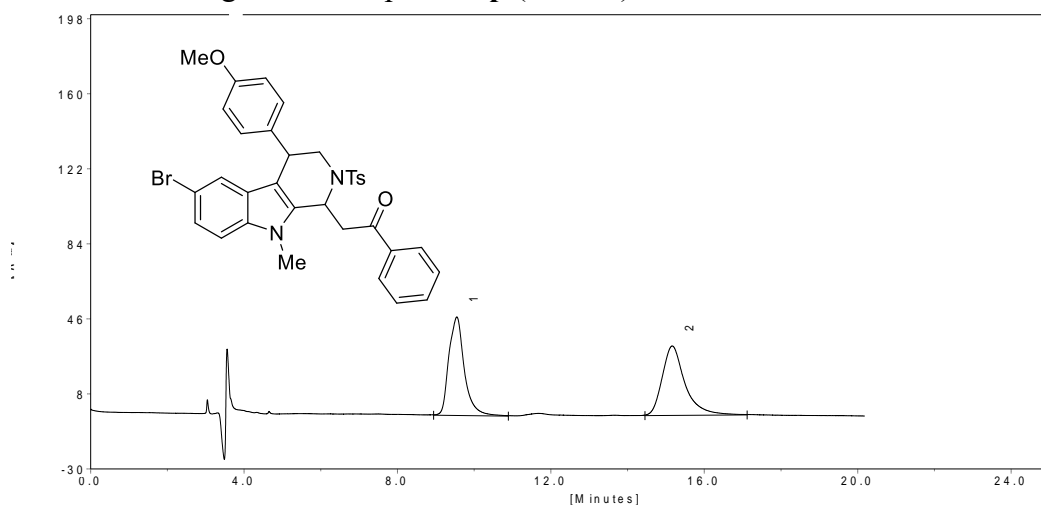

|   | Ret Time (min) | Height ( $\mu\text{V}$ ) | Area ( $\mu\text{V}\cdot\text{sec}$ ) | Area (%) |
|---|----------------|--------------------------|---------------------------------------|----------|
| 1 | 9.54917        | 49.73                    | 1374.23                               | 49.2150  |
| 2 | 15.16083       | 34.99                    | 1418.07                               | 50.7850  |

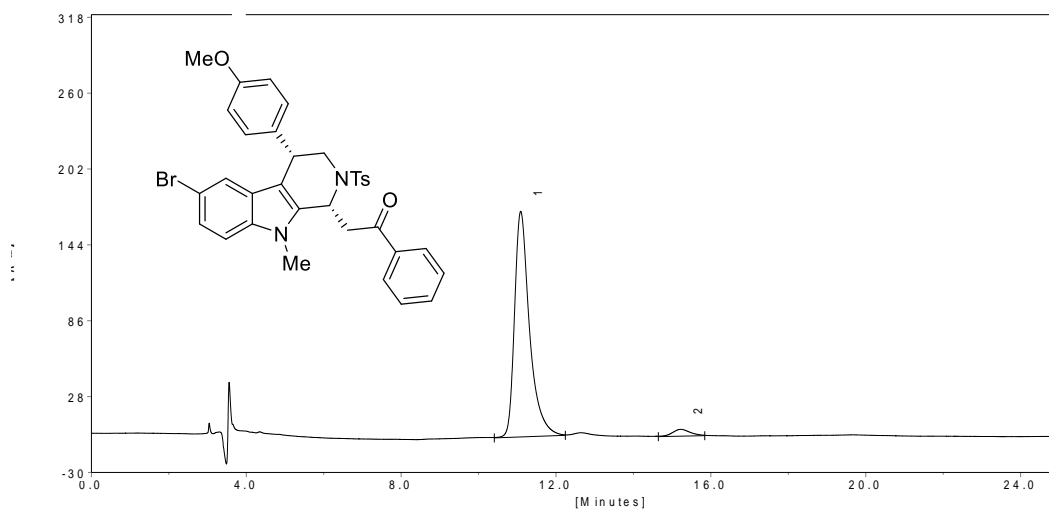

|   | Ret Time (min) | Height ( $\mu\text{V}$ ) | Area ( $\mu\text{V}\cdot\text{sec}$ ) | Area (%) |
|---|----------------|--------------------------|---------------------------------------|----------|
| 1 | 9.56250        | 181.24                   | 3943.55                               | 96.3499  |
| 2 | 15.28083       | 4.58                     | 149.40                                | 3.6501   |

HPLC chromatogram of compound **3q** (91% ee)

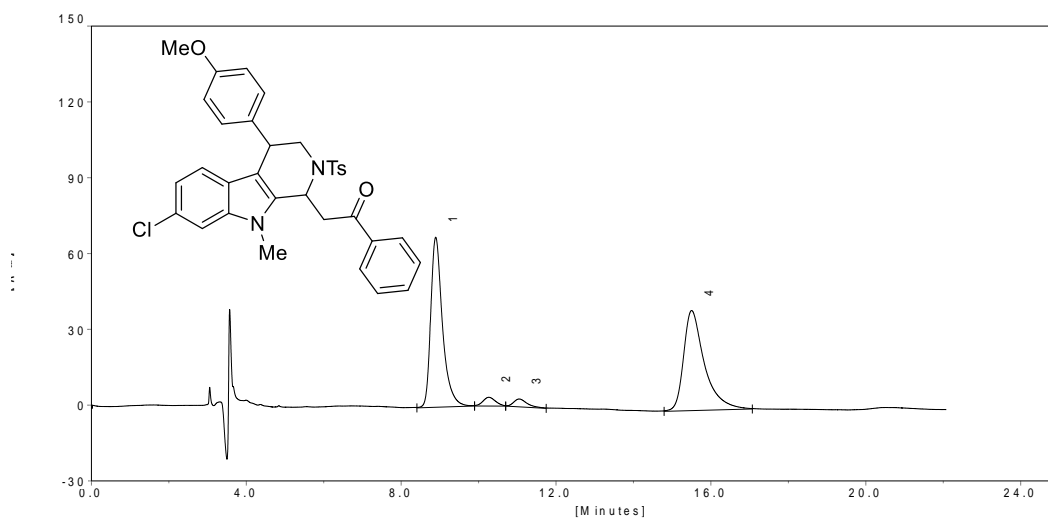

|   | Ret Time (min) | Height ( $\mu\text{V}$ ) | Area ( $\mu\text{V}\cdot\text{sec}$ ) | Area (%) |
|---|----------------|--------------------------|---------------------------------------|----------|
| 1 | 8.89333        | 67.15                    | 1405.87                               | 46.8250  |
| 2 | 10.26000       | 3.30                     | 70.46                                 | 2.3469   |
| 3 | 11.04583       | 2.97                     | 66.64                                 | 2.2195   |
| 4 | 15.50500       | 39.44                    | 1459.42                               | 48.6086  |

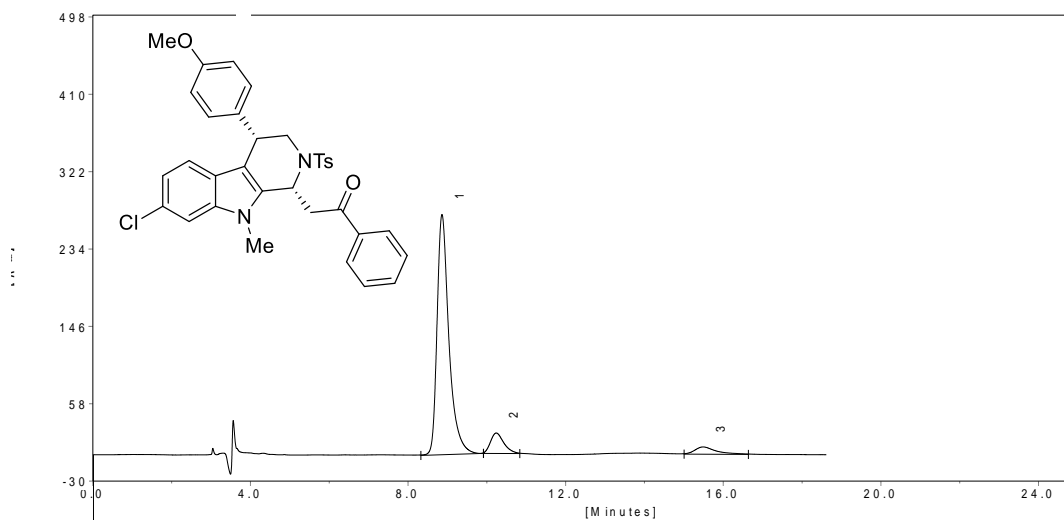

|   | Ret Time (min) | Height ( $\mu\text{V}$ ) | Area ( $\mu\text{V}\cdot\text{sec}$ ) | Area (%) |
|---|----------------|--------------------------|---------------------------------------|----------|
| 1 | 8.86167        | 272.78                   | 5663.76                               | 87.6911  |
| 2 | 10.23750       | 22.82                    | 521.43                                | 8.0733   |
| 3 | 15.48500       | 7.82                     | 273.57                                | 4.2357   |



### HPLC chromatogram of compound **3r** (94% ee)

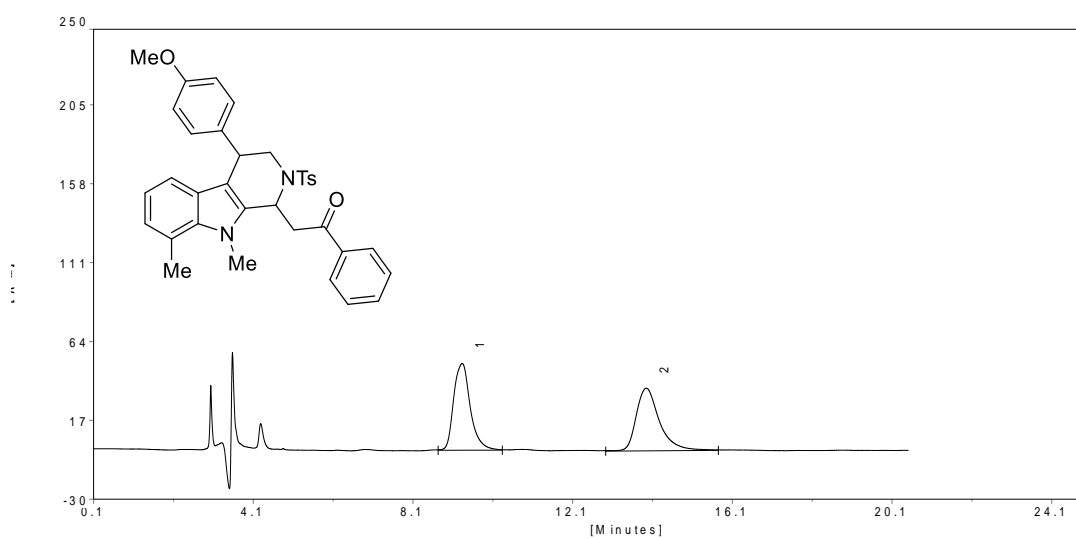

|   | Ret Time (min) | Height (μV) | Area (μV.sec) | Area (%) |
|---|----------------|-------------|---------------|----------|
| 1 | 9.33333        | 51.45       | 1470.74       | 50.1814  |
| 2 | 13.94750       | 37.11       | 1460.11       | 49.8186  |

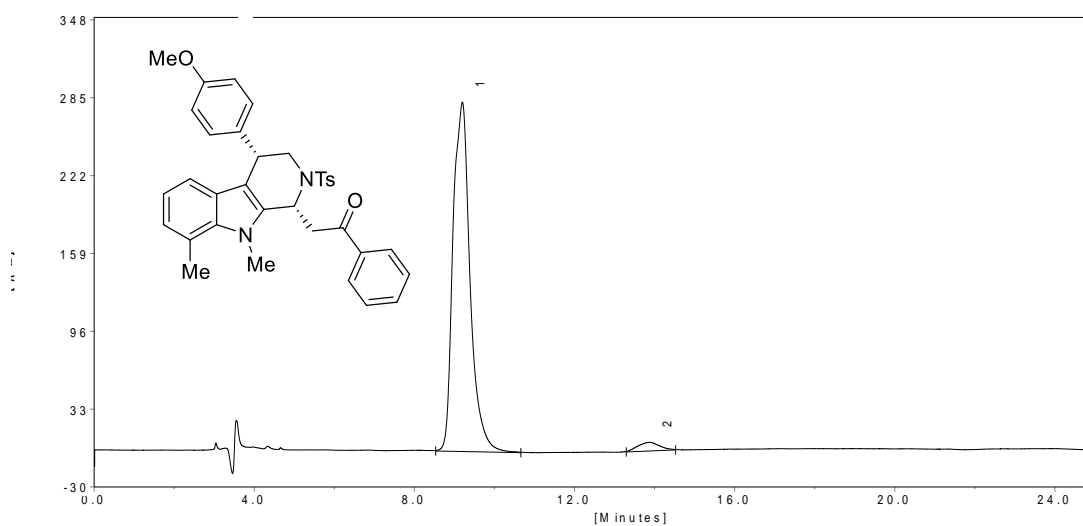

|   | Ret Time (min) | Height (μV) | Area (μV.sec) | Area (%) |
|---|----------------|-------------|---------------|----------|
| 1 | 9.20000        | 282.39      | 8316.58       | 97.1949  |
| 2 | 13.87417       | 6.64        | 240.02        | 2.8051   |

HPLC chromatogram of compound **3s** (94% ee)

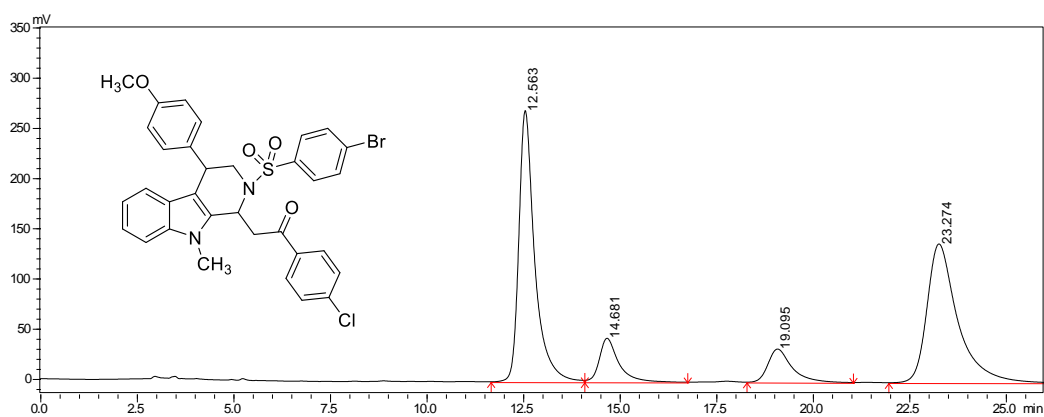

|   | Ret Time (min) | Height ( $\mu\text{V}$ ) | Area ( $\mu\text{V}\cdot\text{sec}$ ) | Area (%) |
|---|----------------|--------------------------|---------------------------------------|----------|
| 1 | 12.563         | 270057                   | 7723129                               | 42.202   |
| 2 | 14.681         | 43578                    | 1522921                               | 8.322    |
| 3 | 19.095         | 33047                    | 1411586                               | 7.713    |
| 4 | 23.274         | 138222                   | 7642778                               | 41.763   |

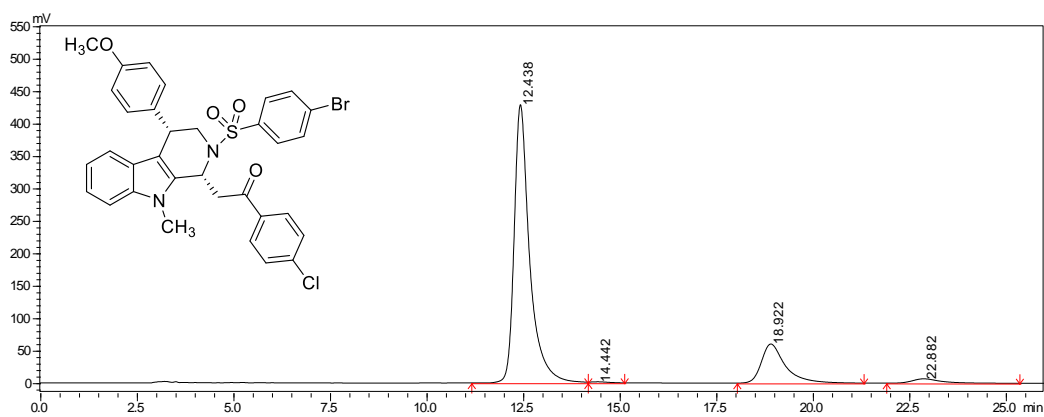

|   | Ret Time (min) | Height ( $\mu\text{V}$ ) | Area ( $\mu\text{V}\cdot\text{sec}$ ) | Area (%) |
|---|----------------|--------------------------|---------------------------------------|----------|
| 1 | 12.438         | 428797                   | 11949014                              | 79.972   |
| 2 | 14.442         | 1628                     | 52128                                 | 0.349    |
| 3 | 18.922         | 60262                    | 2595801                               | 17.373   |
| 4 | 22.882         | 6704                     | 344562                                | 2.306    |

HPLC chromatogram of compound **3t** (87% ee)

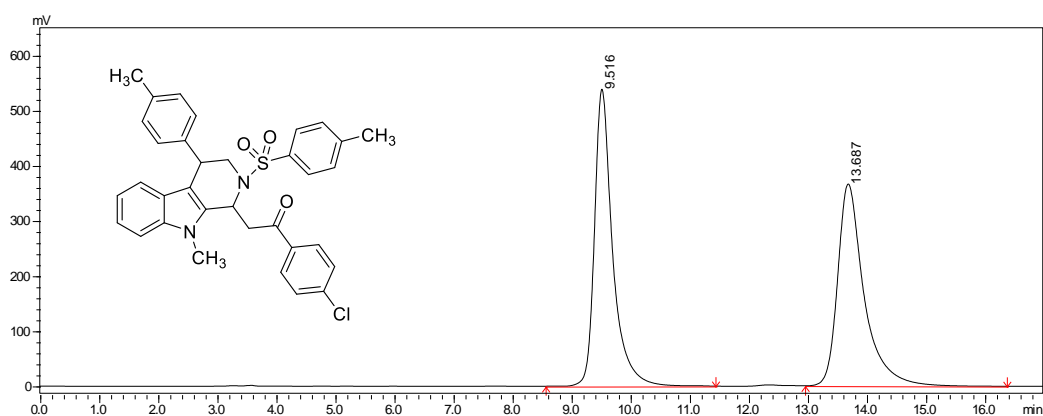

|   | Ret Time (min) | Height (μV) | Area (μV.sec) | Area (%) |
|---|----------------|-------------|---------------|----------|
| 1 | 9.516          | 538982      | 11498837      | 50.285   |
| 2 | 13.687         | 366432      | 11368453      | 49.715   |

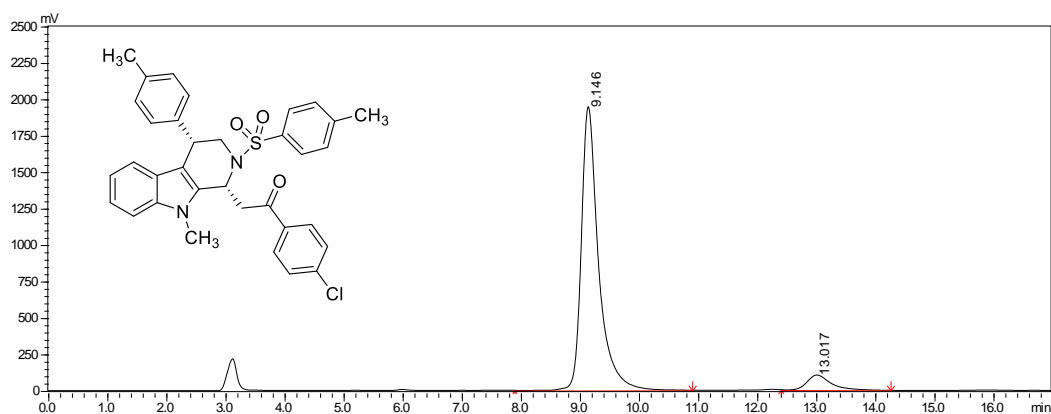

|   | Ret Time (min) | Height (μV) | Area (μV.sec) | Area (%) |
|---|----------------|-------------|---------------|----------|
| 1 | 9.146          | 1945246     | 39349885      | 93.348   |
| 2 | 13.017         | 102029      | 2804260       | 6.652    |

HPLC chromatogram of compound **3u** (96% ee)

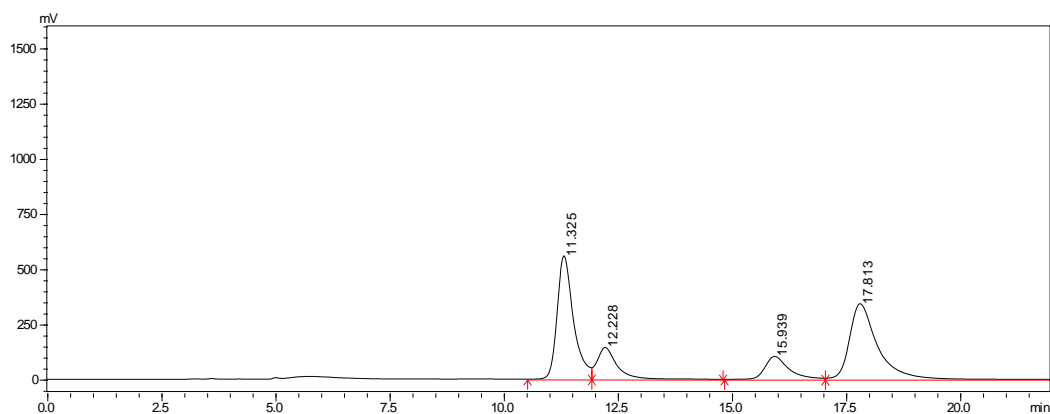

|   | Ret Time (min) | Height (μV) | Area (μV.sec) | Area (%) |
|---|----------------|-------------|---------------|----------|
| 1 | 11.325         | 558311      | 13892261      | 37.929   |
| 2 | 12.228         | 144130      | 4407309       | 12.033   |
| 3 | 15.939         | 103685      | 3742353       | 10.217   |
| 4 | 17.813         | 342323      | 14585379      | 39.821   |

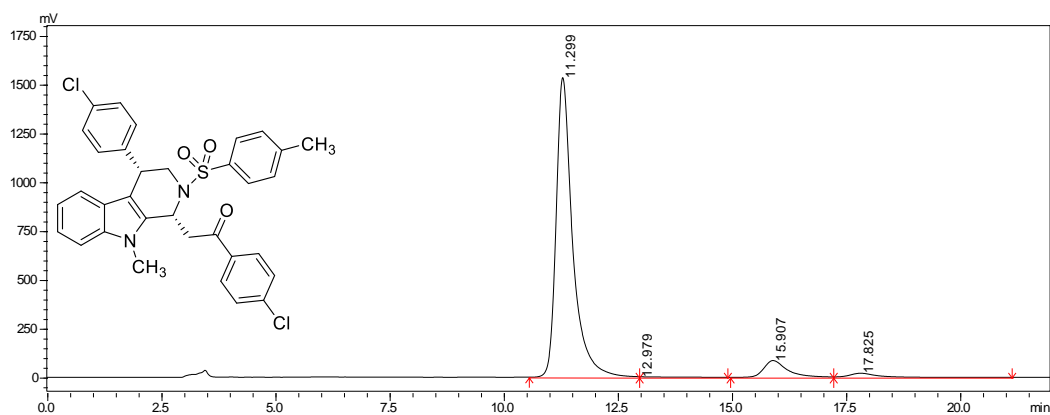

|   | Ret Time (min) | Height (μV) | Area (μV.sec) | Area (%) |
|---|----------------|-------------|---------------|----------|
| 1 | 11.299         | 1534316     | 38639559      | 90.527   |
| 2 | 12.979         | 2744        | 90162         | 0.211    |
| 3 | 15.907         | 85838       | 3064569       | 7.180    |
| 4 | 17.825         | 21002       | 888480        | 2.082    |

### HPLC chromatogram of compound **3v** (60% ee)

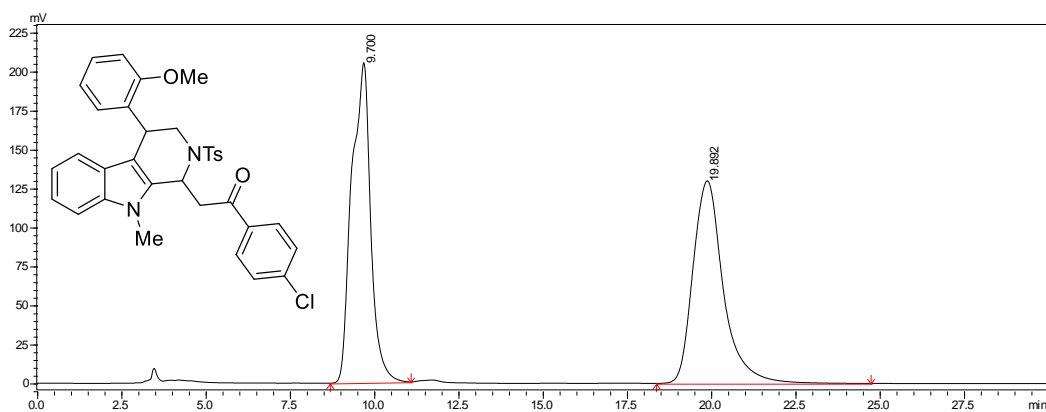

|   | Ret Time (min) | Height ( $\mu\text{V}$ ) | Area ( $\mu\text{V}\cdot\text{sec}$ ) | Area (%) |
|---|----------------|--------------------------|---------------------------------------|----------|
| 1 | 9.700          | 205276                   | 8042339                               | 49.737   |
| 2 | 19.892         | 129951                   | 8127300                               | 50.263   |

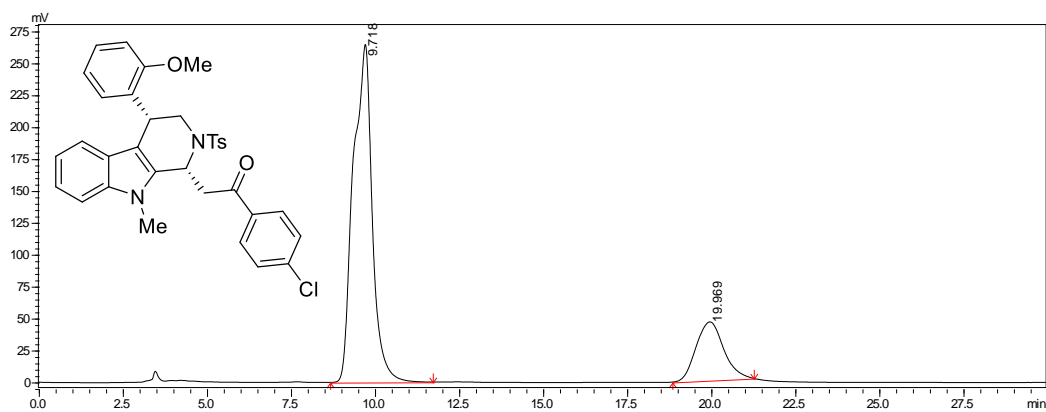

|   | Ret Time (min) | Height ( $\mu\text{V}$ ) | Area ( $\mu\text{V}\cdot\text{sec}$ ) | Area (%) |
|---|----------------|--------------------------|---------------------------------------|----------|
| 1 | 9.718          | 264594                   | 10388270                              | 79.880   |
| 2 | 19.969         | 45795                    | 2616553                               | 20.120   |

### HPLC chromatogram of compound **3w** (69% ee)

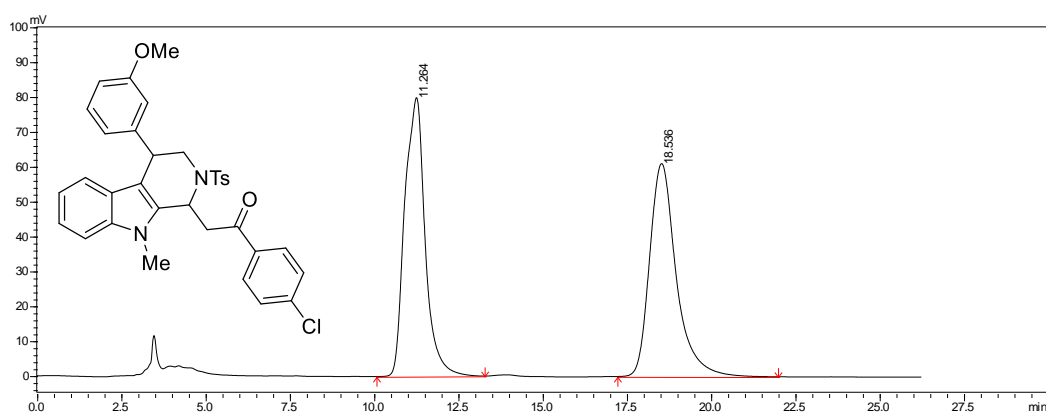

|   | Ret Time (min) | Height ( $\mu$ V) | Area ( $\mu$ V.sec) | Area (%) |
|---|----------------|-------------------|---------------------|----------|
| 1 | 11.264         | 79907             | 3362735             | 50.063   |
| 2 | 18.536         | 61047             | 3354223             | 49.937   |

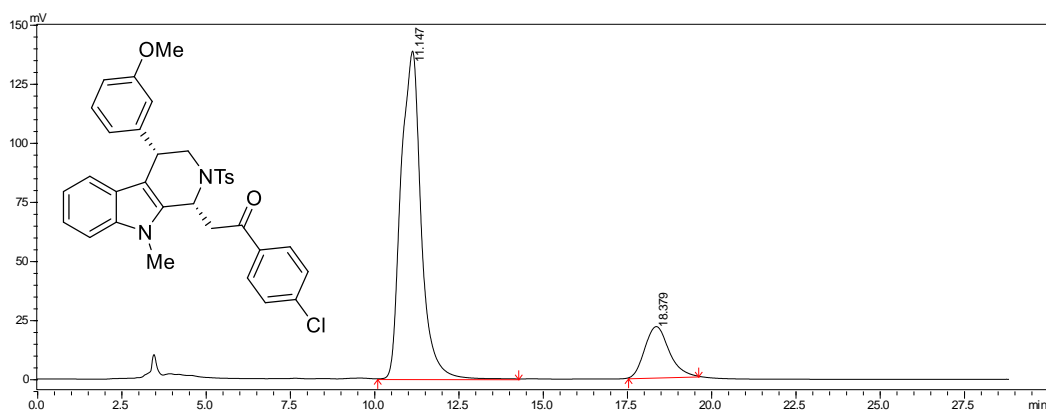

|   | Ret Time (min) | Height ( $\mu$ V) | Area ( $\mu$ V.sec) | Area (%) |
|---|----------------|-------------------|---------------------|----------|
| 1 | 11.147         | 138667            | 5730010             | 84.306   |
| 2 | 18.379         | 21434             | 1066661             | 15.694   |
